# Supplementary material for: Aromatic foldamers as scaffolds for metal second coordination sphere design
Source: Royal Society of Chemistry journal article supplement (doi:10.1039/d0sc05143h), 2020-01-01

## Electronic Supporting Information

### Aromatic foldamers as scaffolds for metal second coordination sphere design

Antoine Meunier,<sup>a#</sup> Michael L. Singleton,<sup>aS#</sup> Brice Kauffmann,<sup>b</sup> Thierry Granier,<sup>a</sup> Guillaume Lautrette,<sup>a</sup> Yann Ferrand,<sup>\*a</sup> and Ivan Huc<sup>\*a,c</sup>

<sup>a</sup> Université de Bordeaux, CNRS, Bordeaux Institut National Polytechnique, CBMN (UMR 5248), IECB, 2 Rue Escarpit, 33600 Pessac, France. E-mail: y.ferrand@iecb.u-bordeaux.fr

<sup>b</sup> Université de Bordeaux, CNRS, INSERM, Institut Européen de Chimie et Biologie (UMS 3033), 2 rue Robert Escarpit, 33600, Pessac, France

<sup>c</sup> Department of Pharmacy, Centre for Integrated Protein Science, Ludwig-Maximilians-Universität, Butenandtstraße 5-13, D-81377 Munich, Germany. E-mail: ivan.huc@cup.lmu.de

# A.M. and M.L.S. contributed equally to this work.

§ Current address: Institute of Condensed Matter and Nanosciences. Université Catholique de Louvain, Place Louis Pasteur 1, Louvain-la-Neuve, b1348, Belgium

#### This PDF file includes:

|                                                                                             | Page |
|---------------------------------------------------------------------------------------------|------|
| <b>1. Methods for NMR, Infrared Spectroscopy and X-ray Crystallography</b> .....            | S2   |
| <b>2. Materials and Methods for chemical synthesis</b> .....                                | S3   |
| 2.1 Synthesis of oligomer <b>1</b> .....                                                    | S3   |
| 2.2 Synthesis of oligomers <b>2</b> , <b>13</b> and <b>3</b> .....                          | S4   |
| 2.3 Synthesis of oligomers <b>4</b> and <b>5</b> .....                                      | S5   |
| 2.4 Synthesis of monomers <b>9</b> , <b>10</b> and <b>11</b> .....                          | S6   |
| 2.5 Synthesis of dimer <b>14</b> .....                                                      | S6   |
| 2.6 Synthesis of tetramer <b>23</b> .....                                                   | S7   |
| 2.7 Experimental procedures .....                                                           | S7   |
| <b>3. Solution studies by NMR</b> .....                                                     | S20  |
| 3.1 NMR study of monomer <b>9</b> .....                                                     | S20  |
| 3.2 NMR study of monomer <b>16</b> .....                                                    | S20  |
| 3.3 NMR study of dimer <b>20</b> .....                                                      | S21  |
| 3.4 NMR comparison of dimer <b>20</b> , tetramer <b>22</b> and oligomer <b>4</b> .....      | S21  |
| 3.5 NMR study of oligomer <b>5</b> .....                                                    | S22  |
| 3.6 Full Width at Half Maximum of carbonyl ligand signals .....                             | S25  |
| <b>4. Solid state X-Ray Crystallography</b> .....                                           | S28  |
| 4.1 X-Ray data for oligomer <b>1</b> .....                                                  | S28  |
| 4.2 X-Ray data for oligomer <b>3</b> .....                                                  | S30  |
| 4.3 X-Ray data for oligomer <b>4</b> .....                                                  | S32  |
| 4.4 X-Ray data for oligomer <b>5</b> .....                                                  | S34  |
| 4.5 X-Ray data for monomer <b>9</b> .....                                                   | S36  |
| <b>5. References</b> .....                                                                  | S37  |
| <b>6. <sup>1</sup>H NMR and <sup>13</sup>C NMR spectra of new synthetic compounds</b> ..... | S38  |

## 1. Methods for NMR, Infrared Spectroscopy and X-Ray Crystallography

**Nuclear Magnetic Resonance.** NMR spectra were recorded on 3 different NMR spectrometers: (1) an Avance II NMR spectrometer (Bruker BioSpin) with a vertical 7,05T standard-bore/ultrashield magnet operating at 300 MHz for  $^1\text{H}$  observation and 75 MHz for  $^{13}\text{C}$  observation by means of a 5mm BBFO BB- $^{19}\text{F}/^1\text{H}$  probe with Z-gradients capabilities; (2) an Avance III HD NMR spectrometer (Bruker BioSpin) with a vertical 9.39T standard-bore/ultrashield magnet operating at 400 MHz for  $^1\text{H}$  observation and 100 MHz for  $^{13}\text{C}$  observation by means of a 5mm “Smart Probe” BBFO BB- $^{19}\text{F}/^1\text{H}$  with Z-gradients. (3) an Avance III NMR spectrometer (Bruker BioSpin) with a vertical 16.45T standard-bore/ultrashield magnet operating at 700 MHz for  $^1\text{H}$  observation and 176 MHz for  $^{13}\text{C}$  observation by means of a 5mm BBO  $^1\text{H}$ - $^{19}\text{F}$ /BB probe with Z-or a 5mm TXI  $^1\text{H}/^{13}\text{C}/^{15}\text{N}$  probe with Z-gradients capabilities Each probe is connected to a Bruker Cooling Unit II. Chemical shifts are reported in parts per million (ppm,  $\delta$ ) and calibrated against residual  $^1\text{H}$  and  $^{13}\text{C}$  solvent signals.  $^1\text{H}$  NMR splitting patterns with observed first-order coupling are designated as singlet (s), doublet (d), triplet (t), or multiplet (m). Coupling constants ( $J$ ) are reported in hertz. Data processing was performed with TopSpin 3.2 software.

**Infrared spectroscopy.** Infrared spectra were recorded on a Bruker IFS 55 spectrometer in CaF<sub>2</sub> solution cell with a 0.1 mm path length from Specac (omni-cell).

**X-Ray Crystallography.** The data for crystal structures of compounds **1**, **2** and **3** have been collected at the European Synchrotron Radiation Facility (BM30A beamline). The data were processed using the XDS package.<sup>1</sup> The data for crystal structures of compounds **4** and **5** have been collected at the European Institute for Chemistry and Biology X-ray facility (UMS 3033) on a Rigaku FRX rotating anode at the CuK $\alpha$  wavelength. The system features a micro-focus x-ray source with the hybrid DECTRIS PILATUS 200K detector combined with the partial chi goniometer and the osmic® varimax multilayer optics. The system is driven and the data processed by the CrystalClear suite. The unit cell determinations have been performed using a combination of Fast Fourier and Difference Vector techniques. All the structures have been solved by direct methods with SHELXD or SHELXT and refined by full-matrix least-squares methods using SHELXL.<sup>2</sup> The Coot software<sup>3</sup> was used for modelling. Owing to the size of the molecules, and the thorough task of controlling bond angles and bond lengths, geometric restraints, generated with program PRODRG<sup>4</sup>, were applied to each model. It has to be noticed that all the crystals described below contain a large percentage of disordered solvent molecules and very few of them could be modeled in the Fourier difference density maps. Therefore, the SQUEEZE procedure<sup>5</sup> implemented in PLATON<sup>6</sup> was used for all structures in order to treat the regions with highly disordered solvent molecules (mainly chloroform, water, methanol, chlorobenzene or *n*-hexane molecules). Every time where solvent or side chain disorder could be modeled with partial occupancy, it was done so. SHELXL SIMU, DELU or RIGU restraints were used in the refinement strategy, when needed, as listed in the cif files. Hydrogen atoms were positioned theoretically on riding positions using AFIX command. The final cif files were checked using IUCR’s checkcif algorithm. Due to the characteristics of the crystals mentioned above (small size, large volume fractions of disordered solvent molecules, side chains disorder, weak diffraction intensity, incompleteness of the data and moderate resolution), a number of A-level and B-level alerts remain in the check cif file.

## 2. Materials and Methods for chemical synthesis

All reactions were carried out under a dry nitrogen atmosphere. Commercial reagents were purchased from Sigma-Aldrich, Alfa-Aesar or TCI and were used without further purification unless otherwise specified. Tetrahydrofuran (THF) dichloromethane ( $\text{CH}_2\text{Cl}_2$ ) and toluene were dried over alumina columns; chloroform ( $\text{CHCl}_3$ ) and diisopropylethylamine (DIEA) were distilled over calcium hydride ( $\text{CaH}_2$ ) prior to use. Reactions were monitored by thin layer chromatography (TLC) on Merck silica gel 60-F254 plates and observed under UV light. Column chromatography purifications were carried out on Merck GEDURAN Si60 (40-63  $\mu\text{m}$ ). Gel permeation chromatography was performed on an LC-9130G NEXT (Japan Analytical Industry Co., Ltd.) setup equipped with two preparative columns (Inner diameter of 20mm and length of 600mm): a JAIGEL 2.5H and a JAIGEL 3H. Column temperatures were regulated at 37  $^\circ\text{C}$  in an oven. A mixture of chloroform (HPLC grade, ethanol stabilized) and trimethylamine (0.5% vol/vol) was used for the separations. ESI mass spectra were obtained from the Mass Spectrometry Laboratory at the European Institute of Chemistry and Biology (UMS 3033 - IECB), Pessac, France.

### 2.1 Synthesis of oligomer 1

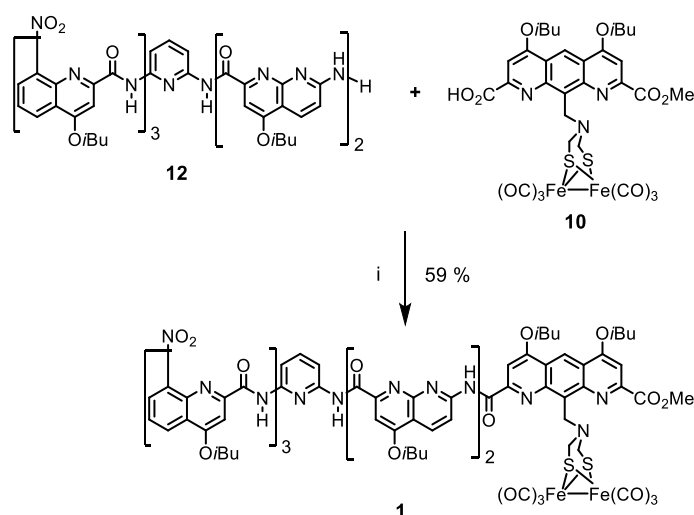

**Scheme S1.** i) PyBOP, DIEA,  $\text{CHCl}_3$ .

## 2.2 Synthesis of oligomers **2**, **13** and **3**

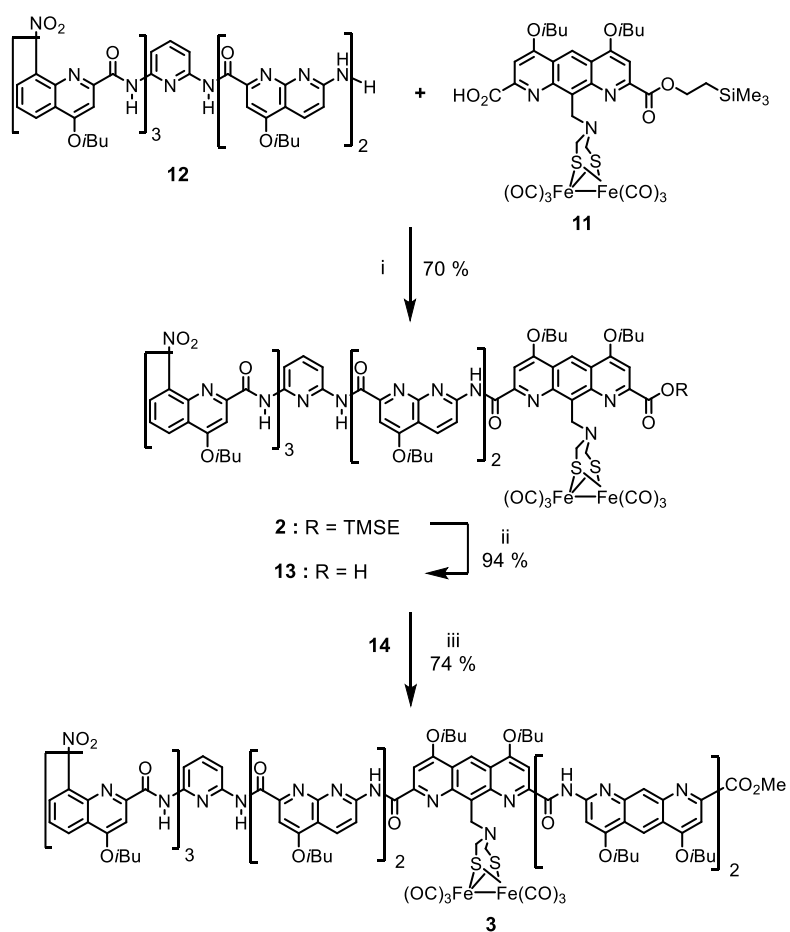

**Scheme S2.** i) PyBOP, DIEA, CH<sub>2</sub>Cl<sub>2</sub>, ii) TFA, CH<sub>2</sub>Cl<sub>2</sub>, iii) PyBOP, DIEA, CHCl<sub>3</sub>.

## 2.3 Synthesis of oligomers 4 and 5

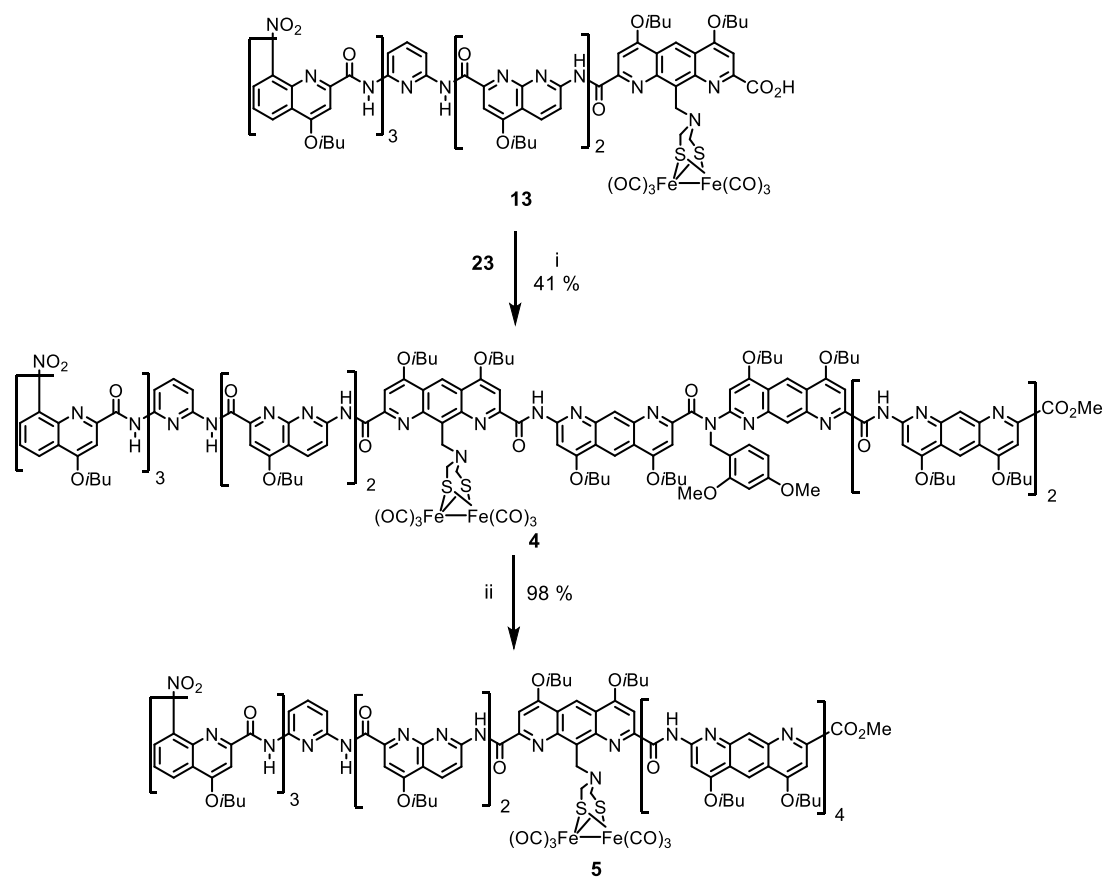

Scheme S3. i) PyBOP, DIEA,  $CHCl_3$ , ii) TFA,  $CH_2Cl_2$ .

## 2.4 Synthesis of oligomers 9, 10 and 11

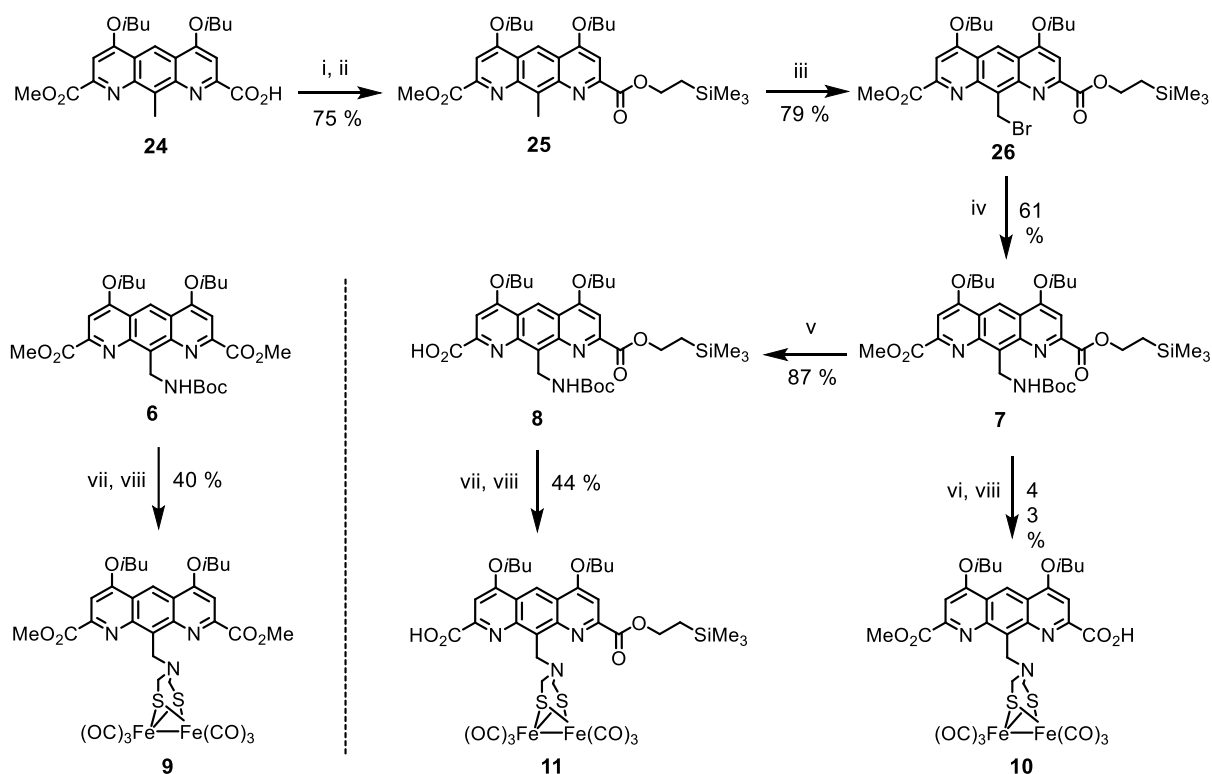

**Scheme S4.** i)  $(\text{COCl})_2$ ,  $\text{CH}_2\text{Cl}_2$ , ii)  $\text{TMSEOH}$ ,  $\text{CH}_2\text{Cl}_2$ , iii)  $\text{NBS}$  benzoyl peroxide, benzene,  $65^\circ\text{C}$  iv)  $\text{KNBoc}_2$ ,  $\text{DMF}$ ,  $50^\circ\text{C}$ , v)  $\text{LiI}$ ,  $\text{EtOAc}$ , dark,  $80^\circ\text{C}$ , vi)  $\text{TFA}$ ,  $\text{CH}_2\text{Cl}_2$ , vii)  $\text{HCl}$  4M, dioxane, viii)  $\text{Fe}_2(\text{SH})_2\text{CO}_6$ , formalin,  $\text{THF}$ .

## 2.5 Synthesis of dimer 14

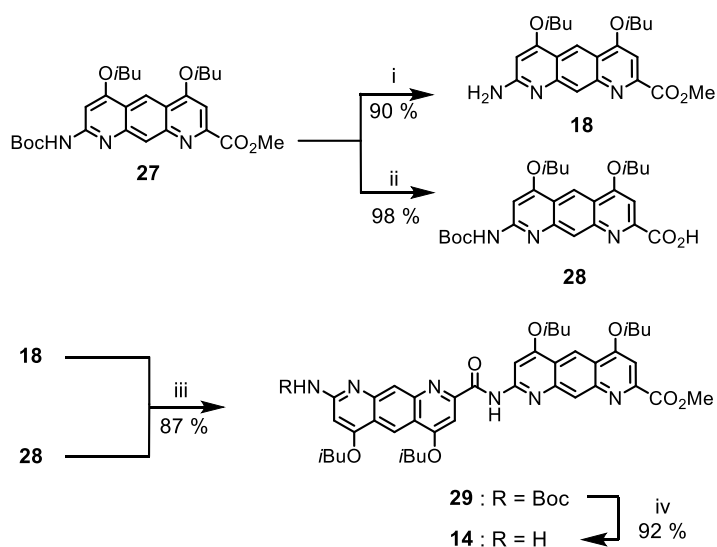

**Scheme S5.** i)  $\text{TFA}$ ,  $\text{CH}_2\text{Cl}_2$ , ii)  $\text{LiOH}\cdot\text{H}_2\text{O}$ ,  $\text{THF}/\text{MeOH}/\text{H}_2\text{O}$ , iii)  $\text{PyBOP}$ ,  $\text{DIEA}$ ,  $\text{CHCl}_3$ , iv)  $\text{TFA}$ ,  $\text{CH}_2\text{Cl}_2$ .

## 2.6 Synthesis of tetramer 23

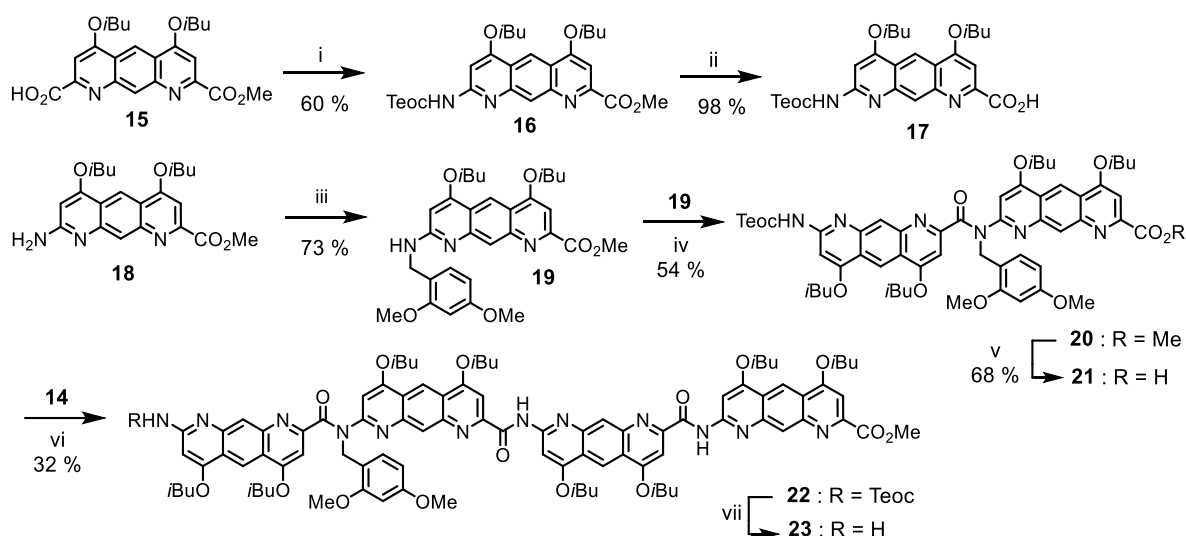

**Scheme S6.** i) DPPA, DIEA, TMSEOH, toluene, 100°C, ii) LiOH.H<sub>2</sub>O, THF, MeOH and H<sub>2</sub>O, room temperature, iii) 2,4-dimethoxybenzaldehyde, NaBH(OAc)<sub>3</sub>, DCE, 40°C, iv) PyBOP, DIEA, CH<sub>2</sub>Cl<sub>2</sub>, room temperature, v) LiI, EtOAc, dark, 80°C, vi) PyBOP, DIEA, CHCl<sub>3</sub>, room temperature, vii) TBAF, succinic acid, THF, DMF, room temperature.

## 2.7 Experimental procedures

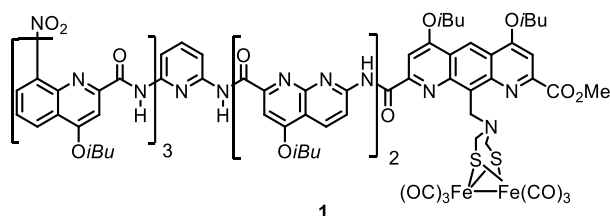

**Oligomer 1.** Hexamer amine **12**<sup>7</sup> (50 mg, 37  $\mu$ mol), monomer complex **10** (33 mg, 40  $\mu$ mol) and PyBOP (38 mg, 73  $\mu$ mol) were dissolved in dry chloroform (1 mL). Then, DIEA (12  $\mu$ L, 70  $\mu$ mol) was added and the reaction mixture was let to stir at room temperature. After 12 hours, the reaction mixture was diluted with dichloromethane and washed with an aqueous saturated solution of NH<sub>4</sub>Cl, distilled water and brine. Then, the organic layer was dried over MgSO<sub>4</sub>, filtered and solvents were removed under reduced pressure. The solid residue was purified by flash chromatography (SiO<sub>2</sub>) using cyclohexane:EtOAc (3:1 vol/vol) as eluent to give **1** (47 mg, 59%) as a red solid. <sup>1</sup>H NMR (300 MHz, CDCl<sub>3</sub>)  $\delta$  ppm = 11.92 (s, 1H), 11.55 (s, 1H), 11.46 (s, 1H), 11.13 (s, 1H), 10.37 (s, 1H), 9.78 (s, 1H), 8.98 (d, *J* = 9.0 Hz, 1H), 8.91 (s, 1H), 8.87 (d, *J* = 9.0 Hz, 1H), 8.83 (d, *J* = 1.5 Hz, 1H), 8.80 (d, *J* = 1.5 Hz, 1H), 8.46 – 8.40 (m, 2H), 8.29 (d, *J* = 7.5 Hz, 1H), 8.18 (d, *J* = 7.8 Hz, 1H), 7.87 (s, 1H), 7.86 – 7.84 (m, 3H), 7.80 (d, *J* = 7.9 Hz, 1H), 7.75 (s, 1H), 7.72 (d, *J* = 7.7 Hz, 1H), 7.24 (s, 2H), 7.14 (s, 1H), 7.05 (s, 1H), 7.02 (s, 1H), 6.59 (t, *J* = 8.0 Hz, 1H), 6.48 (s, 1H), 6.32 (t, *J* = 8.0 Hz, 1H), 5.05 (d, *J* = 13.6 Hz, 1H), 4.45 (d, *J* = 13.7 Hz, 1H), 4.35 – 4.24 (m, *J* = 15.9, 8.6 Hz, 4H), 4.21 (d, *J* = 6.4 Hz, 3H), 4.19 – 4.12 (m, *J* = 7.1 Hz,

1H), 4.08 – 3.93 (m, 3H), 3.87 – 3.80 (m, 1H), 3.62 (s, 3H), 3.56 (s, 1H), 3.49 – 3.43 (m, 1H), 3.33 – 3.24 (m, 2H), 2.51 – 2.25 (m, 6H), 1.30 (d,  $J = 6.7$  Hz, 6H), 1.27 – 1.21 (m, 24H), 0.78 (d,  $J = 6.2$  Hz, 3H), 0.52 (d,  $J = 6.5$  Hz, 3H).  $^{13}\text{C}$  NMR (176 MHz,  $\text{CDCl}_3$ )  $\delta$  ppm = 207.84, 166.07, 164.58, 164.12, 164.02, 164.00, 163.66, 163.27, 163.05, 162.99, 162.96, 162.64, 161.89, 161.59, 160.74, 154.91, 154.61, 154.58, 153.70, 153.53, 152.66, 151.63, 150.80, 150.15, 149.00, 148.95, 147.15, 145.09, 144.82, 143.74, 139.97, 139.05, 138.20, 135.85, 134.58, 134.43, 134.37, 134.28, 129.86, 128.25, 126.29, 126.12, 125.82, 124.14, 123.55, 122.78, 121.73, 121.31, 120.86, 118.03, 117.12, 115.77, 115.53, 115.50, 115.40, 115.00, 114.89, 114.38, 110.13, 108.46, 101.20, 99.31, 98.57, 98.51, 98.24, 96.92, 96.56, 76.05, 75.89, 75.61, 75.56, 75.40, 75.27, 74.94, 53.45, 53.08, 52.07, 45.95, 29.83, 28.48, 28.40, 28.33, 27.92, 19.64, 19.46, 19.35, 18.57. HRMS (ESI<sup>+</sup>):  $m/z$  calcd for  $\text{C}_{189}\text{H}_{196}\text{Fe}_2\text{N}_{30}\text{O}_{35}\text{S}_2$   $[\text{M}+2\text{H}]^{2+}$  2157.5625 found 2157.5688. IR ( $\text{cm}^{-1}$ ,  $\text{CH}_2\text{Cl}_2$ ):  $\nu(\text{CO})_{\text{complex}}$ , 2071, 2033, 1993.

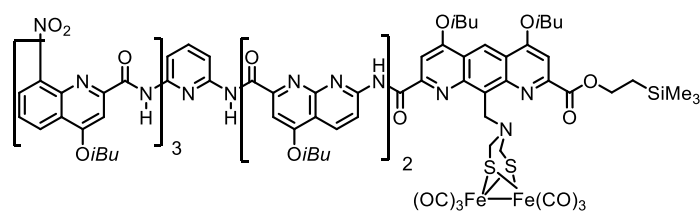

2

**Oligomer 2.** Amine hexamer **12** (120 mg, 89  $\mu\text{mol}$ ), diazaanthracene metal complex **11** (105 mg, 0.115 mmol) and PyBOP (140 mg, 0.27 mmol) were dissolved in dry dichloromethane (2 mL). Then, DIEA (50  $\mu\text{L}$ , 0.27 mmol) was added and the reaction mixture was let to stir at room temperature. After 5 hours, the reaction mixture was diluted with dichloromethane, washed with a saturated aqueous solution of  $\text{NH}_4\text{Cl}$ , distilled water and brine. Then, the organic layer was dried over  $\text{MgSO}_4$ , filtered and the solvent was removed under reduced pressure. The solid residue was purified by flash chromatography ( $\text{SiO}_2$ ) using cyclohexane:EtOAc (3:1 vol/vol) as eluent to give **2** (140 mg, 70 %) as a red solid.  $^1\text{H}$  NMR (300 MHz,  $\text{CDCl}_3$ )  $\delta$  ppm = 11.93 (s, 1H), 11.61 (s, 1H), 11.51 (s, 1H), 11.18 (s, 1H), 10.43 (s, 1H), 9.82 (s, 1H), 8.96 (d,  $J = 9.0$  Hz, 1H), 8.87 (s, 1H), 8.85 – 8.78 (m,  $J = 9.1, 4.2$  Hz, 3H), 8.43 (dd,  $J = 12.9, 4.9$  Hz, 2H), 8.30 (d,  $J = 7.7$  Hz, 1H), 8.26 (d,  $J = 7.7$  Hz, 1H), 7.85 (d,  $J = 2.1$  Hz, 3H), 7.78 (t,  $J = 7.9$  Hz, 2H), 7.73 – 7.67 (m,  $J = 3.8$  Hz, 2H), 7.23 – 7.12 (m,  $J = 7.6$  Hz, 3H), 7.04 (dd,  $J = 14.2, 8.3$  Hz, 2H), 6.66 (t,  $J = 8.0$  Hz, 1H), 6.40 (s, 1H), 6.34 (t,  $J = 8.0$  Hz, 1H), 4.78 (dd,  $J = 165.5, 13.5$  Hz, 2H), 4.36 – 4.25 (m,  $J = 5.9$  Hz, 4H), 4.21 (d,  $J = 6.5$  Hz, 4H), 4.07 (d,  $J = 6.3$  Hz, 1H), 3.98 (d,  $J = 6.5$  Hz, 2H), 3.90 – 3.72 (m,  $J = 13.9$  Hz, 3H), 3.61 (s, 1H), 3.56 (s, 3H), 3.31 (d,  $J = 6.1$  Hz, 2H), 2.54 – 2.20 (m, 7H), 1.40 – 1.08 (m, 38H), 0.80 (d,  $J = 6.3$  Hz, 3H), 0.55 (d,  $J = 6.3$  Hz, 3H), -0.10 (s, 9H).  $^{13}\text{C}$  NMR (75 MHz,  $\text{CDCl}_3$ )  $\delta$  ppm = 207.89, 165.67, 164.55, 164.00, 163.97, 163.87, 163.65, 163.10, 163.02, 162.91, 162.83, 162.55, 161.79, 161.46, 160.58, 154.86, 154.80, 154.53, 154.46, 153.66, 153.29, 152.62, 151.47, 150.74, 150.16, 149.69, 149.11, 147.04, 145.03, 144.71, 143.67, 139.87, 139.04, 139.02, 138.09, 135.47, 134.56, 134.30, 128.17, 126.32, 126.05, 125.79, 124.06, 123.48, 122.79, 121.49, 121.15, 120.76, 118.00, 117.06, 115.74, 115.46, 115.35, 114.93, 114.83, 114.24, 109.91, 108.41, 101.08, 99.36, 98.54, 98.35, 98.12, 96.76, 96.40, 75.99, 75.83, 75.58, 75.51, 75.41, 75.27, 74.85, 64.47, 53.38, 51.84, 28.43, 28.36, 28.31, 28.28, 27.89, 19.41, 19.33, 19.29, 18.59, 17.36, -1.60. HRMS (ESI<sup>+</sup>):  $m/z$  calcd for  $\text{C}_{109}\text{H}_{113}\text{Fe}_2\text{N}_{18}\text{O}_{23}\text{S}_2\text{Si}$   $[\text{M}+\text{H}]^+$  2243.6176 found 2243.6208. IR ( $\text{cm}^{-1}$ ,  $\text{CH}_2\text{Cl}_2$ ):  $\nu(\text{CO})_{\text{complex}}$ , 2071, 2033, 1993.



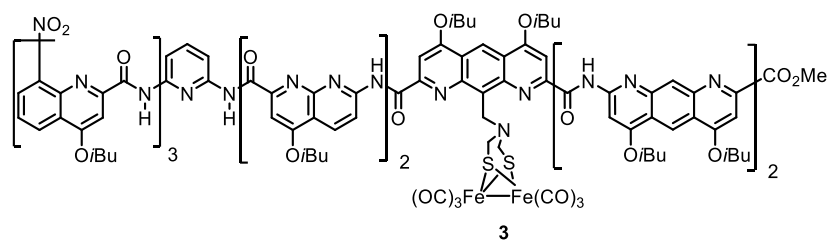

**Oligomer 3.** Heptamer complex acid **13** (50 mg, 23  $\mu\text{mol}$ ), dimer amine **14** (26 mg, 34  $\mu\text{mol}$ ) and PyBOP (36 mg, 69  $\mu\text{mol}$ ) were dissolved in dry chloroform (1 mL). Then, DIEA (22  $\mu\text{L}$ , 69  $\mu\text{mol}$ ) was added and the reaction mixture was let to stir at room temperature. After 12 hours, the reaction mixture was diluted with dichloromethane and washed with an aqueous saturated solution of  $\text{NH}_4\text{Cl}$ , distilled water and brine. Then, the organic layer was dried over  $\text{Na}_2\text{SO}_4$ , filtered and solvents were removed under reduced pressure. The solid residue was purified by flash chromatography ( $\text{SiO}_2$ ) using dichloromethane:acetone (95:5 vol/vol) as eluent to give **3** (50 mg, 74 %) as a red solid.  $^1\text{H}$  NMR (300 MHz,  $\text{CDCl}_3$ )  $\delta$  ppm = 11.71 (s, 1H), 11.36 (s, 2H), 11.14 (s, 1H), 10.83 (s, 1H), 10.79 (s, 1H), 10.09 (s, 1H), 9.43 (s, 1H), 9.21 (s, 1H), 9.17 (d,  $J = 9.0$  Hz, 1H), 8.95 (s, 1H), 8.91 (s, 1H), 8.89 (d,  $J = 9.0$  Hz, 1H), 8.25 (dd,  $J = 7.9, 1.7$  Hz, 1H), 8.16 (s, 1H), 8.00 (d,  $J = 7.3$  Hz, 2H), 7.97 – 7.89 (m,  $J = 8.5, 4.3$  Hz, 5H), 7.80 (s, 2H), 7.65 (s, 1H), 7.56 (s, 1H), 7.44 – 7.38 (m, 2H), 7.24 – 7.21 (m, 2H), 7.17 (t,  $J = 7.7$  Hz, 1H), 7.00 (d,  $J = 7.8$  Hz, 1H), 6.86 (d,  $J = 8.2$  Hz, 1H), 6.81 (s, 1H), 6.77 (d,  $J = 8.2$  Hz, 1H), 6.66 (s, 1H), 6.33 (t,  $J = 7.9$  Hz, 1H), 6.21 – 6.12 (m, 2H), 5.85 (t,  $J = 8.0$  Hz, 1H), 5.23 (d,  $J = 12.6$  Hz, 1H), 4.54 (d,  $J = 12.5$  Hz, 1H), 4.46 – 4.23 (m, 10H), 4.23 – 4.07 (m, 6H), 4.02 (s, 3H), 3.97 – 3.88 (m, 1H), 3.84 – 3.62 (m, 7H), 3.19 – 3.03 (m, 2H), 2.56 – 2.33 (m, 10H), 2.19 – 2.12 (m, 1H), 1.38 – 1.15 (m, 54H), 1.10 – 1.03 (m, 6H), 0.60 (d,  $J = 6.5$  Hz, 3H), 0.30 (d,  $J = 6.7$  Hz, 3H).  $^{13}\text{C}$  NMR (75 MHz,  $\text{CDCl}_3$ )  $\delta$  ppm = 207.69, 166.78, 164.50, 164.45, 164.28, 164.04, 163.64, 163.42, 163.24, 162.58, 162.31, 162.13, 161.96, 161.58, 161.38, 159.66, 155.48, 155.16, 154.26, 154.15, 153.56, 152.87, 152.60, 152.05, 151.98, 151.07, 150.89, 150.10, 149.00, 147.76, 147.70, 147.45, 147.16, 146.55, 144.92, 144.57, 143.69, 138.80, 138.57, 137.65, 134.38, 134.28, 134.07, 131.93, 128.04, 127.03, 126.63, 125.75, 123.99, 123.27, 122.58, 122.07, 121.87, 121.27, 120.86, 120.07, 119.66, 119.41, 118.23, 116.64, 116.53, 115.84, 115.71, 115.48, 115.35, 114.72, 113.58, 113.43, 108.32, 106.30, 101.67, 98.77, 98.31, 97.63, 96.76, 95.43, 95.31, 93.69, 92.43, 77.36, 75.97, 75.71, 75.52, 75.27, 75.17, 75.08, 53.92, 53.18, 52.60, 19.74, 19.41, 19.33, 19.29, 18.32, 1.13. HRMS (ESI<sup>+</sup>):  $m/z$  calcd for  $\text{C}_{147}\text{H}_{150}\text{Fe}_2\text{N}_{24}\text{O}_{29}\text{S}_2$  [ $\text{M}+2\text{H}$ ]<sup>2+</sup> 1445.9581 found 1445.9621. IR ( $\text{cm}^{-1}$ ,  $\text{CH}_2\text{Cl}_2$ ):  $\nu(\text{CO})$ , 2072, 2034, 1993.

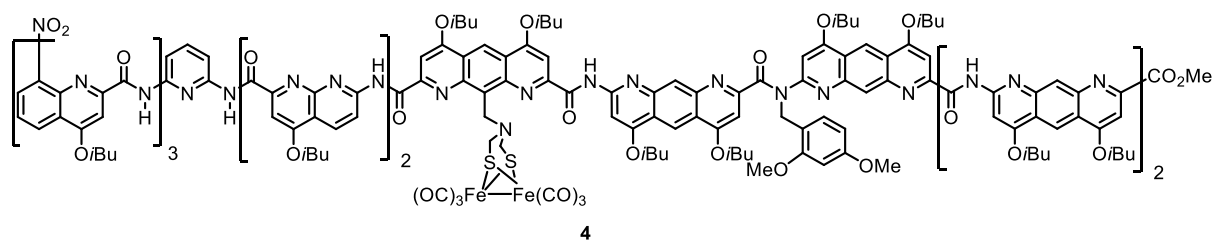

**Oligomer 4.** Tetramer **22** (70 mg, 39  $\mu\text{mol}$ ) was dissolved in dry DMF (10 mL). Then, a solution of tetrabutylammonium fluoride 1M in THF (2 mL) and succinic acid (50 mg, 0.4 mmol) was added and the reaction mixture was stirred at room temperature during 4 hours. After dilution with EtOAc, the organic layer was washed with a saturated aqueous solution of  $\text{NH}_4\text{Cl}$ , distilled water, brine then, the organic layer was dried over  $\text{MgSO}_4$  and filtered. The solvents were removed under reduced pressure to give **23** as a yellow solid that was used directly

in subsequent reaction without further purification. Heptamer complex acid **13** (70 mg, 33  $\mu\text{mol}$ ), tetramer amine (39  $\mu\text{mol}$ ) and PyBOP (51 mg, 98  $\mu\text{mol}$ ) were dissolved in dry chloroform (2 mL). Then, DIEA (10  $\mu\text{L}$ , 65  $\mu\text{mol}$ ) was added and the reaction mixture was stirred at room temperature during 12 hours. The reaction mixture was diluted with dichloromethane and washed with an aqueous saturated solution of  $\text{NH}_4\text{Cl}$ , distilled water and brine. Then, the organic layer was dried over  $\text{MgSO}_4$ , filtered and solvents were removed under reduced pressure. The solid residue was purified by GPC to give **4** (50 mg, 41 %) as a red solid.  $^1\text{H}$  NMR (300 MHz,  $\text{CDCl}_3$ )  $\delta$  ppm = 11.76 (s, 1H), 11.40 (s, 2H), 11.32 (s, 1H), 10.99 (s, 1H), 10.90 (s, 1H), 10.48 (s, 1H), 10.24 (s, 1H), 9.54 (s, 1H), 9.16 (s, 1H), 9.09 (s, 1H), 8.94 (s, 2H), 8.79 (d,  $J = 8.4$  Hz, 1H), 8.69 (s, 1H), 8.60 (s, 1H), 8.44 (s, 2H), 8.35 – 8.22 (m, 5H), 8.19 (d,  $J = 7.7$  Hz, 1H), 8.05 (d,  $J = 7.1$  Hz, 2H), 7.74 (s, 3H), 7.71 – 7.66 (m, 1H), 7.63 (s, 1H), 7.58 (s, 1H), 7.48 (s, 1H), 7.39 – 7.31 (m, 2H), 7.23 – 7.08 (m, 5H), 7.06 (d,  $J = 7.7$  Hz, 1H), 6.97 (d,  $J = 7.9$  Hz, 1H), 6.93 – 6.87 (m, 1H), 6.80 (s, 1H), 6.60 (s, 1H), 6.58 – 6.46 (m, 2H), 6.39 (t,  $J = 8.3$  Hz, 1H), 6.20 – 6.01 (m, 2H), 5.48 – 5.17 (m, 3H), 4.72 (d,  $J = 12.6$  Hz, 1H), 4.31 – 4.04 (m, 22H), 3.90 (d,  $J = 12.7$  Hz, 9H), 3.73 (d,  $J = 4.6$  Hz, 3H), 3.59 (s, 3H), 3.48 (s, 3H), 3.17 – 2.96 (m, 3H), 2.65 – 2.01 (m, 15H), 1.34 – 1.14 (m, 72H), 1.09 (d,  $J = 5.0$  Hz, 6H), 0.98 (d,  $J = 4.1$  Hz, 6H), 0.65 (d,  $J = 5.4$  Hz, 3H), 0.37 (d,  $J = 5.6$  Hz, 3H).  $^{13}\text{C}$  NMR (75 MHz,  $\text{CDCl}_3$ )  $\delta$  ppm = 207.80, 171.27, 166.24, 163.92, 163.40, 163.29, 162.50, 161.73, 161.27, 159.79, 159.63, 158.14, 157.05, 154.96, 154.69, 154.32, 153.65, 153.32, 152.74, 151.90, 151.54, 150.48, 149.30, 147.69, 147.37, 147.25, 147.04, 146.83, 146.45, 144.49, 143.56, 138.77, 138.18, 137.72, 134.33, 134.11, 133.66, 130.95, 128.06, 126.76, 125.94, 125.61, 123.77, 123.25, 122.49, 121.33, 120.78, 120.49, 119.69, 119.44, 118.99, 118.76, 117.71, 116.66, 116.09, 115.70, 115.25, 114.98, 114.58, 114.35, 113.74, 109.42, 106.89, 103.66, 101.15, 98.98, 98.03, 97.25, 96.10, 95.68, 95.51, 93.82, 92.01, 75.45, 75.14, 75.01, 55.12, 53.88, 53.06, 45.84, 29.73, 28.35, 27.64, 19.25, 18.32, 8.67, 1.05. HRMS (ESI<sup>+</sup>):  $m/z$  calcd for  $\text{C}_{198}\text{H}_{206}\text{Fe}_2\text{N}_{30}\text{O}_{37}\text{S}_2$   $[\text{M}+2\text{H}]^{2+}$  1884.6668 found 1884.6636. IR ( $\text{cm}^{-1}$ ,  $\text{CH}_2\text{Cl}_2$ ):  $\nu(\text{CO})_{\text{complex}}$ , 2072, 2030, 1992.

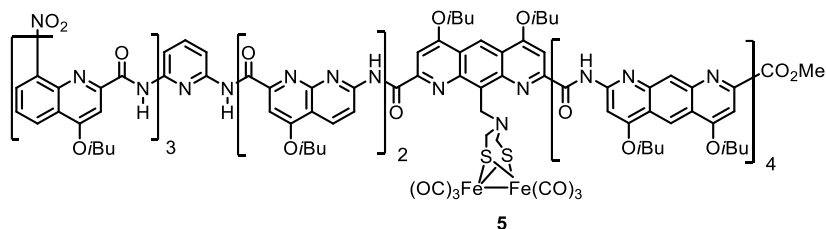

**Oligomer 5.** Oligomer **4** (25 mg, 0.16 mmol) was dissolved in dry dichloromethane (0.5 mL). Then, TFA (0.5 mL) was added slowly at  $0^\circ\text{C}$  and the reaction mixture was stirred at room temperature during 4 hours. The reaction mixture was diluted with dichloromethane and quenched with aqueous saturated  $\text{NaHCO}_3$  solution. The organic layer was washed with distilled water, brine, then the organic layer was dried over  $\text{Na}_2\text{SO}_4$  and filtered. The solvent was removed to give **5** (23 mg, 98%) as a red solid.  $^1\text{H}$  NMR (300 MHz,  $\text{CDCl}_3$ )  $\delta$  ppm = 11.81 (s, 1H), 11.54 (s, 1H), 11.41 (s, 1H), 11.27 (s, 1H), 11.18 (s, 1H), 10.88 (s, 1H), 10.76 (s, 1H), 10.71 (s, 1H), 10.36 (s, 1H), 9.73 (s, 1H), 9.08 (s, 1H), 9.06 (s, 1H), 8.98 (s, 1H), 8.85 (s, 1H), 8.42 (s, 1H), 8.39 (s, 1H), 8.31 (s, 1H), 8.26 (d,  $J = 7.4$  Hz, 1H), 8.16 (d,  $J = 8.3$  Hz, 1H), 8.11 (d,  $J = 7.0$  Hz, 1H), 8.06 (s, 1H), 8.04 (d,  $J = 7.2$  Hz, 1H), 8.02 (s, 1H), 7.98 (s, 1H), 7.88 (s, 1H), 7.83 (d,  $J = 8.3$  Hz, 1H), 7.79 (s, 1H), 7.78 (s, 1H), 7.73 (s, 1H), 7.70 (s, 1H), 7.46 (s, 1H), 7.44 (d,  $J = 8.3$  Hz, 1H), 7.33 (d,  $J = 8.4$  Hz, 1H), 7.19 (s, 1H), 7.18 (s, 2H), 7.14 (s, 1H), 7.13 – 7.11 (m, 2H), 7.09 (t,  $J = 7.2$  Hz, 1H), 6.97 (s, 1H), 6.86 (d,  $J = 7.2$  Hz, 1H), 6.76 (s, 1H), 6.67 (d,  $J = 7.8$  Hz, 1H), 6.52 (d,  $J = 7.6$  Hz, 1H), 6.41 – 6.38 (m, 2H), 6.18 (t,  $J = 7.3$  Hz, 1H), 6.04 (t,  $J = 7.3$  Hz, 1H), 5.89 (t,  $J =$

7.4 Hz, 1H), 4.80 (d,  $J = 14.7$  Hz, 1H), 4.67 – 4.59 (m,  $J = 15.6$  Hz, 4H), 4.44 – 4.35 (m, 6H), 4.26 (t,  $J = 6.7$  Hz, 1H), 4.24 – 4.19 (m, 3H), 4.16 (t,  $J = 6.2$  Hz, 1H), 4.14 – 4.10 (m, 2H), 4.08 (t,  $J = 7.0$  Hz, 1H), 3.99 (t,  $J = 6.1$  Hz, 1H), 3.95 – 3.92 (m, 2H), 3.90 – 3.89 (m, 2H), 3.83 (t,  $J = 6.3$  Hz, 1H), 3.78 – 3.68 (m, 10H), 3.46 (t,  $J = 7.4$  Hz, 1H), 2.84 – 2.81 (m, 1H), 2.52 – 2.42 (m, 8H), 2.39 – 2.20 (m, 7H), 2.16 – 2.11 (m,  $J = 6.8$  Hz, 1H), 1.35 – 1.18 (m, 69H), 1.13 (d,  $J = 6.6$  Hz, 3H), 1.12 – 1.08 (m, 12H), 0.49 (d,  $J = 6.9$  Hz, 3H), 0.26 (d,  $J = 6.6$  Hz, 3H).  $^{13}\text{C}$  NMR (176 MHz,  $\text{CDCl}_3$ )  $\delta$  ppm = 208.54, 166.58, 164.30, 164.17, 164.11, 163.88, 163.71, 163.54, 163.39, 163.25, 163.11, 163.01, 162.97, 162.65, 162.55, 162.47, 162.39, 162.34, 162.15, 161.90, 161.50, 161.15, 160.28, 154.77, 154.40, 154.31, 154.20, 153.36, 153.18, 152.90, 152.56, 152.45, 152.33, 152.26, 151.94, 151.49, 151.40, 151.15, 150.69, 150.24, 149.93, 149.53, 148.30, 147.66, 147.47, 147.06, 147.00, 146.89, 146.79, 146.64, 146.36, 146.19, 144.72, 144.59, 143.74, 138.85, 138.18, 137.22, 134.63, 134.45, 134.13, 131.72, 131.61, 130.91, 127.92, 127.34, 126.61, 126.29, 125.76, 125.53, 123.77, 123.38, 122.61, 121.04, 120.73, 120.57, 120.31, 120.18, 119.82, 119.66, 119.48, 118.84, 117.31, 116.41, 115.65, 115.40, 115.28, 114.47, 113.88, 113.47, 112.86, 108.25, 106.72, 101.22, 99.28, 97.48, 97.00, 96.83, 96.77, 95.83, 95.53, 95.26, 95.10, 94.76, 93.97, 93.86, 92.98, 92.64, 75.33, 75.23, 75.15, 75.08, 74.97, 74.84, 74.63, 55.96, 54.51, 52.85, 29.84, 28.73, 28.65, 28.57, 28.55, 28.49, 28.45, 28.40, 28.33, 28.29, 28.23, 28.12, 27.53, 19.60, 19.57, 19.50, 19.44, 19.42, 19.40, 19.35, 19.29, 19.27, 19.16, 18.33, 1.16. HRMS (ESI<sup>+</sup>):  $m/z$  calcd for  $\text{C}_{189}\text{H}_{196}\text{Fe}_2\text{N}_{30}\text{O}_{35}\text{S}_2$   $[\text{M}+2\text{H}]^{2+}$  1809.6327 found 1809.6343. IR ( $\text{cm}^{-1}$ ,  $\text{CH}_2\text{Cl}_2$ ):  $\nu(\text{CO})_{\text{complex}}$ , 2072, 2030, 1992, 1969 (sh).

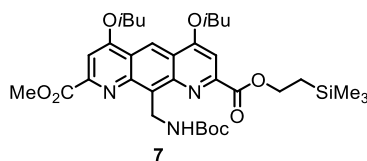

**Monomer 7.** Bromo-benzyl diazaanthracene **26** (6.5 g, 10.5 mmol) and potassium di-*tert*-butyliminodicarbonate (3.2 g, 12.6 mmol) were dissolved in anhydrous DMF (30 mL). The reaction mixture was stirred for 12 hours at 50°C. After solvent removal on a vacuum line, solid residue and magnesium perchlorate (235 mg, 1.05 mmol) were dissolved in acetonitrile (20 mL) and heated to reflux during 1h. During return to room temperature, a precipitate formed and was filtered, giving **7** as a yellow solid (4.2 g, 61 %).  $^1\text{H}$  NMR (300 MHz,  $\text{CDCl}_3$ )  $\delta$  ppm = 9.21 (s, 1H), 7.49 (s, 1H), 7.48 (s, 1H), 5.79 (d,  $J = 6.1$  Hz, 2H), 4.61 – 4.53 (m, 2H), 4.13 (d,  $J = 6.4$  Hz, 4H), 4.08 (s, 3H), 2.42 – 2.30 (m, 2H), 1.42 (s, 9H), 1.35 – 1.26 (m, 3H), 1.19 (d,  $J = 6.7$  Hz, 12H), 0.14 (s, 9H).  $^{13}\text{C}$  NMR (75 MHz,  $\text{CDCl}_3$ )  $\delta$  ppm = 166.45, 165.94, 163.53, 163.46, 156.22, 150.69, 150.41, 145.76, 145.32, 136.51, 121.63, 121.59, 115.83, 98.77, 75.25, 64.67, 53.22, 38.05, 28.65, 28.36, 19.23, 17.58, -1.33. HRMS (ESI<sup>+</sup>):  $m/z$  calcd for  $\text{C}_{34}\text{H}_{50}\text{N}_3\text{O}_8\text{Si}$   $[\text{M}+\text{H}]^+$  656.3361 found 656.3351.

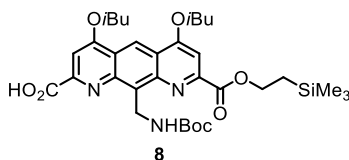

**Monomer 8.** Methyl ester diazaanthracene **7** (655 mg, 1 mmol) and lithium iodide (160 mg, 1.2 mmol) were dissolved in degassed EtOAc (6 mL). The reaction mixture was stirred at 80°C and protected from light. After 5 hours, the reaction mixture was diluted with EtOAc, washed with an aqueous solution of citric acid (5% wt),

distilled water and brine, then, the organic layer was dried over  $\text{MgSO}_4$ , filtered and solvent was removed. The solid residue was purified by flash chromatography ( $\text{SiO}_2$ ) using dichloromethane:methanol:acetic acid (94:5:1) as eluent. The pure fractions were washed with aqueous saturated solution of  $\text{NaHCO}_3$ , aqueous solution of citric acid (5% wt), water and brine then, the organic layer was dried over  $\text{Na}_2\text{SO}_4$ , filtered and solvents were removed to give **8** as a yellow solid (560 mg, 87%).  $^1\text{H NMR}$  (300 MHz,  $\text{CDCl}_3$ )  $\delta$  ppm = 9.24 (s, 1H), 7.59 (s, 1H), 7.48 (s, 1H), 5.76 (d,  $J = 6.6$  Hz, 2H), 5.44 (t,  $J = 6.4$  Hz, 1H), 4.63 – 4.55 (m,  $J = 9.0, 7.7$  Hz, 2H), 4.15 (dd,  $J = 6.3, 5.0$  Hz, 4H), 2.43 – 2.31 (m, 2H), 1.42 (s, 9H), 1.31 – 1.24 (m, 2H), 1.19 (dd,  $J = 6.7, 3.4$  Hz, 13H), 0.15 (s, 9H).  $^{13}\text{C NMR}$  (75 MHz,  $\text{CDCl}_3$ )  $\delta$  ppm = 165.69, 165.66, 164.21, 163.30, 156.49, 151.41, 149.17, 145.56, 144.01, 136.18, 121.48, 121.40, 116.37, 98.98, 97.28, 79.67, 75.55, 75.29, 64.72, 35.20, 28.56, 28.33, 28.27, 19.21, 19.16, 17.51, -1.29. HRMS (ESI<sup>+</sup>):  $m/z$  calcd for  $\text{C}_{33}\text{H}_{48}\text{N}_3\text{O}_8\text{Si}$   $[\text{M}+\text{H}]^+$  642.3205 found 642.3205.

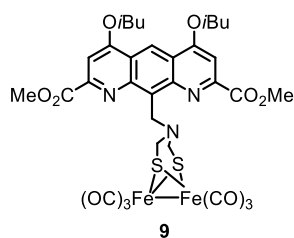

**Monomer 9.** Boc-protected diazaanthracene **6**<sup>8</sup> (570 mg, 1 mmol) was dissolved in dioxane (8 mL). A solution of HCl 4 M in dioxane (2 mL, 8 mmol) was slowly added at 0°C and the reaction mixture was stirred during 1 hour at room temperature. The solvent was removed under reduced pressure and the resulting ammonium chloride salt was dried under high vacuum. In the meantime, complex  $\text{Fe}_2\text{S}_2(\text{CO})_6$  (344 mg, 1 mmol)<sup>9</sup> was dissolved in dry THF (7.4 mL) and maintained at -78°C. Then, a solution of lithium triethylborohydride 1M in THF (2.2 mL, 2.2 mmol) was added slowly and the reaction mixture was allowed to stir at -78°C. After 30 minutes, TFA (0.18 mL, 2.4 mmol) was slowly added and the reaction mixture was allowed to stir at room temperature. After 1 hour, formalin (0.195 mL, 2.6 mmol) was added and the reaction mixture was allowed to stir 2 more hours at room temperature. Then, the last reaction mixture was added to the previous ammonium chloride salt and the whole was stirred during 12 hours at room temperature. Solvent was removed under reduced pressure and the crude was purified by flash chromatography ( $\text{SiO}_2$ ) using cyclohexane:EtOAc (90/10) as eluent, followed by precipitation in hexane to give **9** as a red solid (340 mg, 40 %).  $^1\text{H NMR}$  (300 MHz,  $\text{CDCl}_3$ )  $\delta$  ppm = 9.18 (s, 1H), 7.46 (s, 2H), 5.32 (s, 2H), 4.27 – 4.01 (m, 14H), 2.44 – 2.26 (m, 2H), 1.18 (d,  $J = 6.3$  Hz, 12H).  $^{13}\text{C NMR}$  (75 MHz,  $\text{CDCl}_3$ )  $\delta$  ppm = 208.34, 166.36, 163.59, 150.53, 145.68, 136.78, 121.88, 116.19, 98.92, 75.39, 53.38, 53.30, 49.82, 28.40, 19.28. HRMS (ESI<sup>+</sup>):  $m/z$  calcd for  $\text{C}_{33}\text{H}_{34}\text{Fe}_2\text{N}_3\text{O}_{12}\text{S}_2$   $[\text{M}+\text{H}]^+$  840.0277 found 840.0296. IR ( $\text{cm}^{-1}$ ,  $\text{CH}_2\text{Cl}_2$ ):  $\nu(\text{CO})_{\text{complex}}$ , 2070, 2031, 1993.

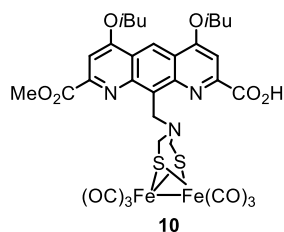

**Monomer 10.** Boc-protected diazaanthracene **7** (400 mg, 0.61 mmol) was dissolved in dry dichloromethane (3 mL) then, TFA (3 mL) was slowly added at 0°C and the reaction mixture was let to stir at room temperature. After

2 hours, toluene was added and the solvents were removed by rotary evaporation. The resulting ammonium TFA salt diazaanthracene was dried under high vacuum. In the meantime, complex  $\text{Fe}_2\text{S}_2(\text{CO})_6$  (210 mg, 0.61 mmol) was dissolved in dry THF (4.4 mL) and maintained at  $-78^\circ\text{C}$ . Then, a solution of lithium triethylborohydride 1M in THF (1.3 mL, 1.3 mmol) was added slowly and the reaction mixture was allowed to stir at  $-78^\circ\text{C}$ . After 30 minutes, TFA (0.11 mL, 1.5 mmol) was slowly added and the reaction mixture was allowed to stir at room temperature. After 1 hour, formalin (0.120 mL, 1.6 mmol) was added and the reaction mixture was allowed to stir 2 more hours at room temperature. Then, the last reaction mixture was added to the previous ammonium TFA salt diazaanthracene and the whole was stirred during 12 hours at room temperature. Solvent was removed under reduced pressure and the residue was purified by flash chromatography ( $\text{SiO}_2$ ) using dichloromethane:methanol (98/2) as eluent, followed by precipitation in hexane to give **10** as a red solid (225 mg, 43 %).  $^1\text{H}$  NMR (300 MHz,  $\text{CDCl}_3$ )  $\delta$  ppm = 9.27 (s, 1H), 7.59 (s, 1H), 7.51 (s, 1H), 5.28 (s, 2H), 4.18 (d,  $J = 6.4$  Hz, 2H), 4.14 (d,  $J = 6.4$  Hz, 2H), 4.10 (s, 3H), 3.98 (s, 4H), 2.44 – 2.30 (m, 2H), 1.19 (d,  $J = 6.1$  Hz, 12H).  $^{13}\text{C}$  NMR (75 MHz,  $\text{CDCl}_3$ )  $\delta$  ppm = 207.84, 165.89, 165.06, 163.48, 150.89, 146.06, 134.58, 121.89, 121.62, 117.04, 99.32, 75.83, 75.41, 53.25, 53.10, 49.47, 28.24, 19.09. HRMS (ESI<sup>+</sup>):  $m/z$  calcd for  $\text{C}_{32}\text{H}_{32}\text{Fe}_2\text{N}_3\text{O}_{12}\text{S}_2$   $[\text{M}+\text{H}]^+$  826.0120 found 826.0147. IR ( $\text{cm}^{-1}$ ,  $\text{CH}_2\text{Cl}_2$ ):  $\nu(\text{CO})_{\text{complex}}$ , 2072, 2033, 1995.

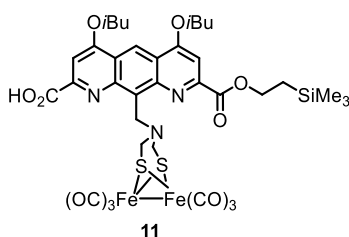

**Monomer 11.** Boc-protected diazaanthracene **8** (640 mg, 1 mmol) was dissolved in dioxane (8 mL). A solution of HCl 4M in dioxane (2 mL, 8 mmol) was slowly added at  $0^\circ\text{C}$  and the reaction mixture was stirred during 1 hour at room temperature. The solvent was removed under reduced pressure and the resulting ammonium chloride salt diazaanthracene was dried under high vacuum. In the meantime, complex  $\text{Fe}_2\text{S}_2(\text{CO})_6$  (344 mg, 1 mmol) was dissolved in dry THF (7.4 mL) and maintained at  $-78^\circ\text{C}$ . Then, a solution of lithium triethylborohydride 1M in THF (2.2 mL, 2.2 mmol) was added slowly and the reaction mixture was allowed to stir at  $-78^\circ\text{C}$ . After 30 minutes, TFA (0.18 mL, 2.4 mmol) was slowly added and the reaction mixture was allowed to stir at room temperature. After 1 hour, formalin (0.195 mL, 2.6 mmol) was added and the reaction mixture was allowed to stir 2 more hours at room temperature. Then, the last reaction mixture was added to the previous ammonium chloride salt diazaanthracene and the whole was stirred during 12 hours at room temperature. The solvent was removed under reduced pressure and the crude was purified by precipitation in diethyl ether to give **11** as a red solid (400 mg, 44%).  $^1\text{H}$  NMR (300 MHz,  $\text{CDCl}_3$ )  $\delta$  ppm = 9.26 (s, 1H), 7.58 (s, 1H), 7.50 (s, 1H), 5.26 (s, 2H), 4.60 – 4.53 (m,  $J = 9.5, 7.8$  Hz, 2H), 4.18 (d,  $J = 6.3$  Hz, 2H), 4.13 (d,  $J = 6.4$  Hz, 2H), 3.98 (s, 4H), 2.44 – 2.28 (m, 2H), 1.34 – 1.27 (m,  $J = 9.6, 7.7$  Hz, 2H), 1.19 (dd,  $J = 6.7, 1.8$  Hz, 12H), 0.14 (s, 9H).  $^{13}\text{C}$  NMR (75 MHz,  $\text{CDCl}_3$ )  $\delta$  ppm = 207.99, 165.74, 165.21, 164.24, 163.64, 151.59, 149.61, 146.37, 143.97, 134.84, 122.17, 121.78, 117.25, 99.43, 97.02, 75.96, 75.52, 64.93, 53.38, 49.86, 28.39, 19.24, 17.88, -1.30. HRMS (ESI<sup>+</sup>):  $m/z$  calcd for  $\text{C}_{36}\text{H}_{42}\text{Fe}_2\text{N}_3\text{O}_{12}\text{S}_2\text{Si}$   $[\text{M}+\text{H}]^+$  912.0672 found 912.0674. IR ( $\text{cm}^{-1}$ ,  $\text{CH}_2\text{Cl}_2$ ):  $\nu(\text{CO})_{\text{complex}}$ , 2072, 2033, 1997.

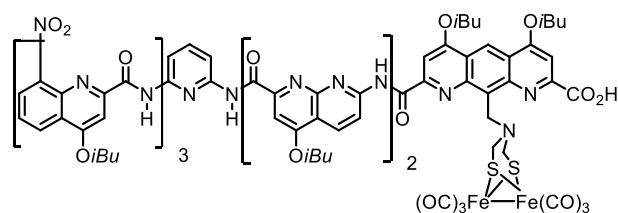

13

**Oligomer 13.** Oligomer **2** (350 mg, 0.16 mmol) was dissolved in dry dichloromethane (2 mL). Then, TFA (4 mL) was added slowly at 0°C and the reaction mixture was let to stir at room temperature. After 2 hours, the reaction mixture was diluted with dichloromethane and quenched with aqueous saturated  $NaHCO_3$  solution. The organic layer was washed with distilled water, brine then, dried over  $Na_2SO_4$  and filtered. The solvent was removed under reduced pressure to give **13** (315 mg, 94 %) as a red solid.  $^1H$  NMR (300 MHz,  $CDCl_3$ )  $\delta$  ppm = 11.91 (s, 1H), 11.54 (s, 1H), 11.39 (s, 1H), 11.27 (s, 1H), 10.18 (s, 1H), 9.74 (s, 1H), 9.12 (s, 1H), 9.00 (d,  $J = 8.9$  Hz, 1H), 8.92 – 8.75 (m, 3H), 8.46 (d,  $J = 7.2$  Hz, 2H), 8.24 (d,  $J = 7.5$  Hz, 1H), 8.10 (d,  $J = 7.7$  Hz, 1H), 8.05 (s, 1H), 7.95 – 7.69 (m, 6H), 7.31 (s, 1H), 7.23 (s, 1H), 7.15 (s, 1H), 7.09 (d,  $J = 7.9$  Hz, 1H), 7.03 (d,  $J = 8.1$  Hz, 1H), 6.65 (s, 1H), 6.53 (t,  $J = 7.6$  Hz, 1H), 6.37 (t,  $J = 7.8$  Hz, 1H), 4.74 (dd,  $J = 173.3, 11.5$  Hz, 2H), 4.40 – 4.14 (m, 8H), 4.03 (d,  $J = 23.3$  Hz, 3H), 3.86 (s, 1H), 3.70 (s, 1H), 3.55 (s, 1H), 3.36 (d,  $J = 17.1$  Hz, 4H), 2.61 – 2.17 (m, 7H), 1.37 – 1.13 (m, 36H), 0.76 (s, 3H), 0.50 (s, 3H).  $^{13}C$  NMR (75 MHz,  $CDCl_3$ )  $\delta$  ppm = 207.50, 164.63, 164.51, 164.21, 164.11, 164.00, 163.90, 163.79, 163.42, 163.14, 163.09, 162.41, 162.11, 161.59, 160.38, 155.00, 154.94, 154.58, 153.80, 153.68, 152.83, 152.62, 150.67, 149.83, 148.75, 148.45, 147.59, 145.12, 144.91, 143.65, 140.19, 139.04, 138.34, 134.60, 134.44, 133.21, 128.29, 126.47, 126.28, 125.68, 124.13, 123.62, 122.82, 122.07, 121.38, 121.08, 118.10, 117.30, 117.02, 115.81, 115.65, 115.43, 114.99, 114.83, 114.59, 110.26, 109.03, 101.25, 99.44, 98.73, 98.52, 97.52, 97.32, 96.60, 76.05, 75.93, 75.83, 75.75, 75.66, 75.44, 75.13, 53.32, 51.63, 28.48, 28.41, 28.33, 27.95, 19.48, 19.44, 19.37, 19.33, 19.27. HRMS (ESI<sup>+</sup>):  $m/z$  calcd for  $C_{104}H_{101}Fe_2N_{18}O_{23}S_2$   $[M+H]^+$  2143.5468 found 2143.5520. IR ( $cm^{-1}$ ,  $CH_2Cl_2$ ):  $\nu(CO)_{complex}$ , 2073, 2035, 1995.

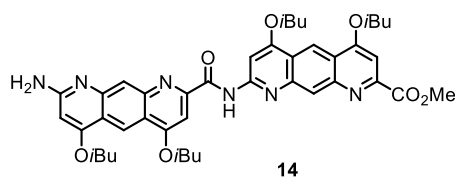

14

**Dimer 14.** Boc-protected dimer **29** (500 mg, 0.58 mmol) was dissolved in dichloromethane (3 mL). Then, TFA (3 mL) was added slowly at 0°C and the reaction mixture was let to stir at room temperature. After 2 hours, the reaction mixture was diluted with dichloromethane and quenched with aqueous saturated  $NaHCO_3$  solution. The organic solvent was removed by rotary evaporation allowing precipitation of the dimer amine in basic aqueous solution. The precipitate was collected by filtration and washed with distilled water on the filter. Then, the solid was dissolved again in dichloromethane then, the organic layer was dried over  $Na_2SO_4$ , filtered and solvents were removed under reduced pressure to give **14** as a yellow solid (410 mg, 92 %).  $^1H$  NMR (300 MHz,  $CDCl_3$ )  $\delta$  ppm = 11.13 (s, 1H), 9.17 (s, 1H), 9.00 (s, 1H), 8.82 (s, 1H), 8.44 (s, 1H), 8.22 (s, 1H), 7.63 (s, 1H), 7.47 (s, 1H), 6.08 (s, 1H), 4.23 – 4.09 (m, 11H), 4.00 (d,  $J = 6.1$  Hz, 2H), 2.43 – 2.30 (m, 4H), 1.20 (t,  $J = 7.5$  Hz, 24H). HRMS (ESI<sup>+</sup>):  $m/z$  calcd for  $C_{43}H_{51}N_6O_7$   $[M+H]^+$  763.3813 found 763.3812.

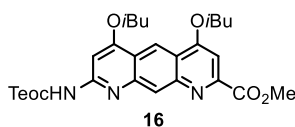

**Monomer 16.** Mono-acid diazaanthracene **15**<sup>8</sup> (3 g, 7 mmol) was dispersed in dry toluene (105 mL) and the mixture was sonicated to obtain a fine slurry. Then, DIEA (2.4 mL, 14 mmol), diphenylphosphoryl azide (3 mL, 14 mmol) and 2-trimethylsilylethanol (6 mL, 42 mmol) were added to the slurry. The reaction mixture was stirred vigorously at 100°C for 3 hours. The solvents were removed under reduced pressure and the residue was dissolved in dichloromethane, washed with a 2M NaOH aqueous solution, distilled water and brine. Then the organic layer was dried over Na<sub>2</sub>SO<sub>4</sub>, filtered and the solvent was removed under reduced pressure. The residue was purified by flash chromatography (SiO<sub>2</sub>) using dichloromethane:acetone (95:5 vol/vol) as eluent to give **16** (2.3 g, 60 %) as a yellow solid. <sup>1</sup>H NMR (300 MHz, CDCl<sub>3</sub>) δ ppm = 9.11 (s, 1H), 8.62 (s, 1H), 7.78 – 7.61 (m, 2H), 7.45 (s, 1H), 4.36 – 4.28 (m, 2H), 4.15 – 4.06 (m, 7H), 2.42 – 2.26 (m, 2H), 1.18 (dd, *J* = 6.7, 4.7 Hz, 12H), 1.13 – 1.05 (m, 2H), 0.09 (s, 9H). <sup>13</sup>C NMR (75 MHz, CDCl<sub>3</sub>) δ ppm = 166.51, 163.61, 154.59, 153.99, 151.05, 148.14, 147.18, 126.20, 120.68, 119.48, 116.80, 98.34, 92.47, 75.16, 75.05, 64.18, 53.44, 28.42, 19.32, 19.28, 17.59, -1.42. HRMS (ESI<sup>+</sup>): *m/z* calcd for C<sub>28</sub>H<sub>40</sub>N<sub>3</sub>O<sub>6</sub>Si [M+H]<sup>+</sup> 542.2680 found 542.2683.

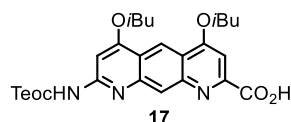

**Monomer 17.** Methyl ester diazaanthracene **16** (2.3 g, 4.25 mmol) was dissolved in THF (30 mL) then, distilled water (10 mL) and lithium hydroxide monohydrate (360 mg, 8.5 mmol) were added. The reaction mixture was let to stir at room temperature. After 2 hours, the reaction mixture was quenched by addition of citric acid monohydrate (3.57 g, 17 mmol) dissolved in distilled water (30 mL). The organic solvent was removed by rotary evaporation allowing precipitation of the acid diazaanthracene in acidic aqueous solution. The precipitate was collected by filtration and washed with distilled water on the filter. Then, the solid residue was dissolved in dichloromethane, the organic layer was dried over Na<sub>2</sub>SO<sub>4</sub>, filtered and the solvent was removed under reduced pressure to give **17** as yellow solid (2.1 g, 98 %). <sup>1</sup>H NMR (300 MHz, CDCl<sub>3</sub>) δ 9.01 (s, 1H), 8.86 (s, 1H), 7.78 (s, 1H), 7.63 (s, 1H), 4.35 – 4.27 (m, 2H), 4.21 (d, *J* = 6.1 Hz, 2H), 4.08 (d, *J* = 6.3 Hz, 2H), 2.40 – 2.30 (m, 2H), 1.18 (dd, *J* = 6.6, 4.1 Hz, 12H), 1.11 – 1.04 (m, 2H), 0.06 (s, 9H). <sup>13</sup>C NMR (75 MHz, CDCl<sub>3</sub>) δ 166.43, 163.69, 163.54, 155.37, 153.86, 152.38, 146.92, 142.82, 121.17, 120.22, 118.38, 117.53, 97.81, 92.60, 76.02, 75.08, 64.25, 28.18, 19.08, 18.97, 17.51, -1.57. HRMS (ESI<sup>+</sup>): *m/z* calcd for C<sub>27</sub>H<sub>38</sub>N<sub>3</sub>O<sub>6</sub>Si [M+H]<sup>+</sup> 528.2524 found 528.2530.

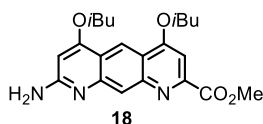

**Monomer 18.** Boc-protected diazaanthracene **27**<sup>8</sup> (1.8 g, 3.6 mmol) was dissolved in dichloromethane (8 mL). Then, TFA (4 mL) was added slowly at 0°C and the reaction mixture was let to stir at room temperature. After 2 hours, the reaction mixture was diluted with dichloromethane and quenched with aqueous saturated NaHCO<sub>3</sub> solution. The organic solvent was removed by rotary evaporation allowing precipitation of the amine diazaanthracene in basic aqueous solution. The precipitate was collected by filtration and washed with distilled water on the filter. Then, the solid residue was dissolved in dichloromethane, the organic layer was dried over

Na<sub>2</sub>SO<sub>4</sub>, filtered and solvent was removed under reduced pressure to give **18** as a yellow solid (1.3 g, 90 %). <sup>1</sup>H NMR (300 MHz, CDCl<sub>3</sub>) δ ppm = 8.99 (s, 1H), 8.43 (s, 1H), 7.41 (s, 1H), 6.05 (s, 1H), 4.98 (s, 1H), 4.13 – 4.06 (m, 5H), 3.96 (d, *J* = 6.3 Hz, 2H), 2.39 – 2.26 (m, 2H), 1.18 (dd, *J* = 6.7, 2.8 Hz, 12H). <sup>13</sup>C NMR (75 MHz, d<sup>6</sup>-DMSO) δ ppm = 165.77, 162.61, 160.55, 150.08, 149.28, 147.91, 121.19, 119.31, 116.14, 115.00, 97.50, 92.33, 74.27, 73.78, 52.64, 27.81, 27.71, 18.82. HRMS (ESI<sup>+</sup>): *m/z* calcd for C<sub>22</sub>H<sub>28</sub>N<sub>3</sub>O<sub>4</sub> [M+H]<sup>+</sup> 398.2074 found 398.2061.

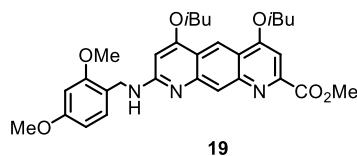

**Monomer 19.** Amine diazaanthracene **18** (398 mg, 1 mmol) and 2,4-dimethoxybenzaldehyde (498 mg, 3 mmol) were dissolved in 1,2-dichloroethane (5mL) then, sodium triacetoxyborohydride (635 mg, 3 mmol) was added and the reaction mixture was let to stir at 40°C. After 5 days, the reaction mixture was diluted with dichloromethane and quenched with aqueous saturated NaHCO<sub>3</sub> solution. The organic layer was washed with distilled water, brine then, dried over MgSO<sub>4</sub>, filtered and the solvents were removed under reduced pressure. The residue was purified by flash chromatography (SiO<sub>2</sub>) using dichloromethane:acetone (8:2 vol/vol) as eluent to give **19** (400 mg, 73 %) as a yellow solid. <sup>1</sup>H NMR (300 MHz, CDCl<sub>3</sub>) δ ppm = 8.91 (s, 1H), 8.45 (s, 1H), 7.41 (d, *J* = 8.2 Hz, 1H), 7.37 (s, 1H), 6.48 (d, *J* = 2.3 Hz, 1H), 6.44 (dd, *J* = 8.2, 2.4 Hz, 1H), 5.96 (s, 1H), 5.30 (s, 1H), 4.68 (d, *J* = 5.5 Hz, 2H), 4.11–4.06 (m, 5H), 3.90 (d, *J* = 6.4 Hz, 2H), 3.86 (s, 3H), 3.79 (s, 3H), 2.39–2.21 (m, 2H), 1.15 (dd, *J* = 8.9, 6.8 Hz, 12H). <sup>13</sup>C NMR (75 MHz, CDCl<sub>3</sub>) δ ppm = 166.68, 163.42, 161.57, 160.29, 158.79, 158.59, 150.15, 149.34, 148.67, 130.97, 123.49, 120.21, 119.65, 117.36, 115.85, 103.87, 98.48, 97.52, 91.21, 74.75, 74.21, 55.36, 55.30, 53.15, 40.72, 28.30, 28.18, 19.15, 19.13. HRMS (ESI<sup>+</sup>): *m/z* calcd for C<sub>31</sub>H<sub>38</sub>N<sub>3</sub>O<sub>6</sub> [M+H]<sup>+</sup> 548.2755 found 548.2755.

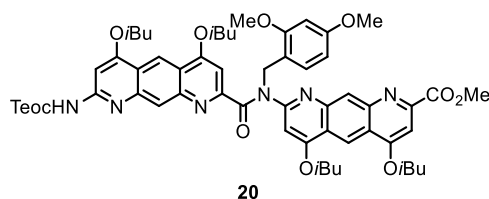

**Dimer 20.** Secondary amine diazaanthracene **19** (620 mg, 1.14 mmol), acid diazaanthracene **17** (600 mg, 1.14 mmol) and PyBOP (1.18 g, 2.27 mmol) were dissolved in dry dichloromethane (5 mL). Then, DIEA (0.290 mL, 1.7 mmol) was added and the reaction mixture was let to stir at room temperature. After 3 hours, the reaction mixture was diluted with dichloromethane, washed with a saturated aqueous solution of NH<sub>4</sub>Cl, distilled water and brine then, the organic layer was dried over MgSO<sub>4</sub>, filtered and the solvent was removed under reduced pressure. The residue was purified by GPC to give **20** (650 mg, 54 %) as a yellow solid. <sup>1</sup>H NMR (300 MHz, CDCl<sub>3</sub>) δ ppm = 8.96 (s, 2H), 8.44 (s, 1H), 7.95 (s, 1H), 7.66 (d, *J* = 8.4 Hz, 1H), 7.59 (s, 1H), 7.49 (s, 1H), 7.36 (s, 1H), 7.08 (s, 1H), 6.81 (s, 1H), 6.45 (dd, *J* = 8.4, 2.4 Hz, 1H), 6.32 (d, *J* = 2.2 Hz, 1H), 5.46 (s, 2H), 4.31 – 4.22 (m, 2H), 4.11 – 3.93 (m, 9H), 3.82 (d, *J* = 6.4 Hz, 2H), 3.75 (s, 3H), 3.51 (s, 3H), 2.38 – 2.21 (m, 3H), 2.21 – 2.08 (m, 1H), 1.21 – 1.08 (m, 18H), 1.09 – 0.97 (m, 8H), 0.05 (s, 9H). <sup>13</sup>C NMR (75 MHz, CDCl<sub>3</sub>) δ ppm = 170.79, 166.19, 164.15, 163.35, 162.79, 162.45, 160.19, 158.23, 158.11, 157.92, 154.20, 153.98, 150.71, 147.57,



147.42, 146.61, 130.68, 127.41, 123.11, 120.56, 120.07, 119.05, 118.84, 118.09, 116.98, 116.43, 104.23, 98.74, 98.33, 98.20, 97.68, 91.73, 75.09, 75.01, 74.94, 74.80, 64.19, 55.28, 55.15, 53.28, 46.04, 28.22, 28.02, 19.15, 19.12, 19.04, 17.39, -1.58. HRMS (ESI<sup>+</sup>): *m/z* calcd for C<sub>58</sub>H<sub>73</sub>N<sub>6</sub>O<sub>11</sub>Si [M+H]<sup>+</sup> 1057.5101 found 1057.5116.

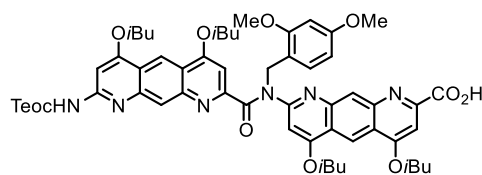

**21**

**Dimer 21.** Diazaanthracene dimer **20** (215 mg, 0.2 mmol) and lithium iodide (136 mg, 1 mmol) were dissolved in degassed EtOAc (5 mL). The reaction mixture was stirred at 80°C and protected from light. After 4 hours, the reaction mixture was let to reach room temperature and the precipitate that formed during the reaction was filtered. The precipitate was dissolved in dichloromethane, washed with an aqueous solution of citric acid (5% wt), distilled water and brine then, the organic layer was dried over Na<sub>2</sub>SO<sub>4</sub>, filtered and solvent was removed to give **21** as a yellow solid (145 mg, 68 %). <sup>1</sup>H NMR (300 MHz, CDCl<sub>3</sub>) δ ppm = 9.03 (s, 1H), 8.99 (s, 1H), 8.32 (s, 1H), 7.96 (s, 1H), 7.63 (s, 1H), 7.61 (s, 1H), 7.47 (s, 1H), 7.09 (s, 1H), 6.82 (s, 1H), 6.47 (d, *J* = 7.6 Hz, 1H), 6.32 (s, 1H), 5.49 (s, 2H), 4.32 – 4.24 (m, 2H), 4.11 (d, *J* = 6.4 Hz, 2H), 4.08 – 3.98 (m, 4H), 3.81 (d, *J* = 5.7 Hz, 2H), 3.76 (s, 3H), 3.47 (s, 3H), 2.37 – 2.24 (m, 4H), 1.14 (dd, *J* = 6.6, 3.1 Hz, 18H), 1.10 – 0.99 (m, 8H), 0.06 (s, 9H). <sup>13</sup>C NMR (75 MHz, CDCl<sub>3</sub>) δ ppm = 170.74, 165.48, 164.91, 162.81, 162.62, 160.33, 158.71, 158.22, 154.22, 153.62, 151.10, 147.96, 147.09, 144.50, 130.40, 124.62, 120.83, 119.80, 119.40, 118.09, 117.54, 104.36, 99.28, 98.37, 97.19, 91.35, 75.80, 75.18, 74.99, 64.85, 55.41, 55.23, 46.18, 29.78, 28.49, 28.07, 19.18, 19.10, 17.63, -1.44. HRMS (ESI<sup>+</sup>): *m/z* calcd for C<sub>57</sub>H<sub>71</sub>N<sub>6</sub>O<sub>11</sub>Si [M+H]<sup>+</sup> 1043.4944 found 1043.4988.

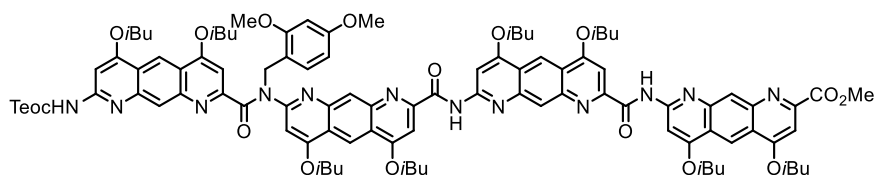

**22**

**Tetramer 22.** Acid dimer **21** (100 mg, 0.096 mmol), amine dimer **14** (95 mg, 0.12 mmol) and PyBOP (150 mg, 0.29 mmol) were dissolved in dry chloroform (2 mL). Then, DIEA (40 μL, 0.23 mmol) was added and the reaction mixture was let to stir at room temperature. After 12 hours, the reaction mixture was diluted with dichloromethane, washed with a saturated aqueous solution of NH<sub>4</sub>Cl, distilled water and brine then, the organic layer was dried over MgSO<sub>4</sub>, filtered and the solvents were removed under reduced pressure. The residue was purified by GPC to give **22** (55 mg, 32 %) as a yellow solid. <sup>1</sup>H NMR (300 MHz, CDCl<sub>3</sub>) δ ppm = 11.10 (s, 1H), 11.01 (s, 1H), 9.08 (d, *J* = 5.8 Hz, 2H), 8.99 (d, *J* = 3.5 Hz, 2H), 8.82 (s, 1H), 8.73 (s, 1H), 8.58 (s, 1H), 8.18 (d, *J* = 6.8 Hz, 2H), 8.08 (s, 1H), 7.69 (d, *J* = 8.5 Hz, 2H), 7.61 (s, 1H), 7.60 (s, 1H), 7.56 (s, 1H), 7.43 (s, 1H), 7.09 (s, 1H), 6.91 (s, 1H), 6.51 (dd, *J* = 8.5, 2.3 Hz, 1H), 6.37 (d, *J* = 2.2 Hz, 1H), 5.57 (s, 2H), 4.30 – 4.23 (m, 2H), 4.19 – 4.04 (m, 15H), 4.01 (d, *J* = 6.4 Hz, 2H), 3.86 – 3.75 (m, 5H), 3.58 (s, 3H), 2.45 – 2.22 (m, 8H), 1.26 – 0.99 (m, 50H), 0.05 (s, 9H). <sup>13</sup>C NMR (75 MHz, CDCl<sub>3</sub>) δ ppm = 170.80, 166.46, 163.86, 163.62, 163.44, 162.83, 162.20, 160.13, 158.26, 157.89, 157.62, 153.64, 151.93, 151.72, 150.92, 148.03, 147.59, 147.40, 147.10, 146.93, 146.75, 130.47, 127.04, 126.82, 125.97, 124.50, 120.86, 120.73, 120.60, 120.20, 119.64, 118.84, 118.48, 116.74, 116.59, 104.21, 98.59,

98.23, 95.63, 93.66, 93.53, 91.57, 75.14, 74.98, 74.85, 64.05, 55.37, 55.24, 53.35, 46.37, 29.71, 28.36, 28.23, 28.01, 19.27, 19.17, 19.05, 17.55, -1.47. HRMS (ESI<sup>+</sup>): *m/z* calcd for C<sub>100</sub>H<sub>119</sub>N<sub>12</sub>O<sub>17</sub>Si [M+H]<sup>+</sup> 1787.8580 found 1787.8652.

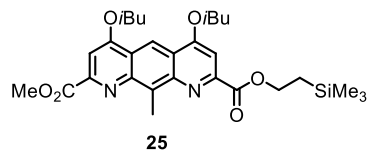

**Monomer 25.** Monoacid 9-méthyldiazaanthracene **24**<sup>8</sup> (10 g, 21.6 mmol) was dissolved in dry dichloromethane (44 mL). A needle was inserted into the septum to act as a gas vent while oxalyl chloride (5.56 mL, 64.8 mmol) was added slowly to the mixture and the reaction mixture was let to stir at room temperature. After 3 hours, solvent was removed under vacuum and the resulting acyl chloride diazaanthracene was dried under high vacuum. Then, the solid was dissolved in dry dichloromethane (44 mL), 2-trimethylsilylethanol (3.18 mL, 23.8 mmol) was added and the reaction mixture was let to stir at room temperature. After 12 hours, the reaction mixture was quenched with aqueous saturated NaHCO<sub>3</sub> solution, the organic layer was washed with water and brine then, dried over MgSO<sub>4</sub>, filtered and solvent was removed under reduced pressure. The residue was dissolved in dichloromethane then, methanol was added and dichloromethane was slowly removed by rotary evaporation allowing precipitation of the diazaanthracene. The precipitate was filtered, washed with cold methanol on the filter and dried under vacuum to give **25** (8.84 g, 75%) as a yellow solid. <sup>1</sup>H NMR (300 MHz, CDCl<sub>3</sub>) δ ppm = 9.17 (s, 1H), 7.53 (s, 1H), 7.52 (s, 1H), 4.66 – 4.59 (m, 2H), 4.17 (dd, *J* = 6.3, 2.2 Hz, 4H), 4.13 (s, 3H), 3.53 (d, *J* = 0.7 Hz, 3H), 2.45 – 2.34 (m, 2H), 1.36 – 1.28 (m, 2H), 1.27 – 1.21 (m, 12H), 0.18 (s, 9H). <sup>13</sup>C NMR (75 MHz, CDCl<sub>3</sub>) δ ppm = 166.52, 166.18, 163.40, 163.31, 150.27, 149.71, 146.00, 145.87, 139.24, 121.60, 121.52, 113.34, 98.75, 98.69, 75.10, 75.07, 64.63, 53.25, 28.40, 19.25, 17.45, 13.18, -1.26. HRMS (ESI<sup>+</sup>): *m/z* calcd for C<sub>29</sub>H<sub>41</sub>N<sub>2</sub>O<sub>6</sub>Si [M+H]<sup>+</sup> 541.2728 found 541.2718.

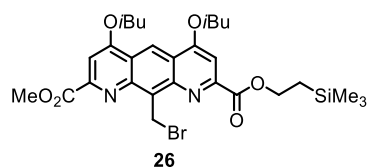

**Monomer 26.** Diazaanthracene **25** (4.4 g, 8.13 mmol), recrystallized N-bromosuccinimide (1.88 g, 10.5 mmol) and benzoyl peroxide (492 mg, 2 mmol) were dissolved in benzene (40 mL) then, the reaction mixture was let to stir at 65°C. After 12 hours, the reaction mixture was washed with a sodium bisulfite aqueous solution, until a negative starch iodide test for peroxides. Solvent was removed under reduced pressure and the residue was dissolved in dichloromethane, washed with water and brine then, the organic layer was dried over Na<sub>2</sub>SO<sub>4</sub>, filtered and solvent was removed under reduced pressure. The residue was dissolved in dichloromethane then, methanol was added and dichloromethane was slowly removed by rotary evaporation allowing precipitation of the diazaanthracene. The precipitate was filtered, washed with cold methanol on the filter and dried under vacuum to give **26** (4 g, 79%) as a yellow solid. <sup>1</sup>H NMR (300 MHz, CDCl<sub>3</sub>) δ ppm = 9.27 (s, 1H), 7.50 (d, *J* = 1.8 Hz, 2H), 6.16 (s, 2H), 4.64 – 4.55 (m, 2H), 4.16 – 4.11 (m, 4H), 4.10 (s, 3H), 2.42 – 2.30 (m, *J* = 13.1, 6.7 Hz, 2H), 1.31 – 1.23 (m, *J* = 10.9, 5.5 Hz, 2H), 1.19 (d, *J* = 6.7 Hz, 12H), 0.16 (s, 9H). <sup>13</sup>C NMR (75 MHz, CDCl<sub>3</sub>) δ ppm =

166.47, 166.11, 163.52, 163.43, 151.50, 150.94, 145.22, 145.15, 136.02, 121.89, 121.80, 117.12, 99.41, 99.37, 75.35, 75.32, 64.77, 53.34, 28.39, 25.26, 19.25, 17.43, -1.18. HRMS (ESI<sup>+</sup>): *m/z* calcd for C<sub>29</sub>H<sub>40</sub>BrN<sub>2</sub>O<sub>6</sub>Si [M+H]<sup>+</sup> 619.1833 found 619.1824.

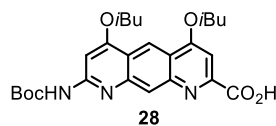

**Monomer 28.** Methyl ester diazaanthracene **27**<sup>8</sup> (1.6 g, 3.2 mmol) was dissolved in a mixture of THF/MeOH/H<sub>2</sub>O (30 mL, 8:1:1 vol/vol) and lithium hydroxide monohydrate (270 mg, 6.4 mmol) were added. The reaction mixture was let to stir at room temperature. After 2 hours, the reaction mixture was quenched by addition of an aqueous citric acid solution (5% weight). The organic solvent was removed by rotary evaporation allowing precipitation of the acid diazaanthracene in acidic aqueous solution. The precipitate was collected by filtration and washed with distilled water on the filter. Then, the solid residue was dissolved in dichloromethane, the organic layer was dried over Na<sub>2</sub>SO<sub>4</sub>, filtered and the solvent was removed under reduced pressure to give **28** as yellow solid (1.52 g, 98 %). <sup>1</sup>H NMR (300 MHz, CDCl<sub>3</sub>) δ 9.15 (s, 1H), 8.41 (s, 1H), 7.74 (s, 1H), 7.54 (s, 1H), 4.17 (d, *J* = 6.4 Hz, 2H), 4.12 (d, *J* = 6.3 Hz, 2H), 2.44 – 2.28 (m, 2H), 1.57 (s, 9H), 1.19 (d, *J* = 6.7 Hz, 12H). <sup>13</sup>C NMR (75 MHz, CDCl<sub>3</sub>) δ 165.92, 164.17, 163.66, 155.34, 152.55, 150.60, 123.02, 120.93, 119.14, 117.87, 96.75, 92.74, 81.94, 75.95, 75.20, 28.48, 28.39, 19.35, 19.22. HRMS (ESI<sup>+</sup>): *m/z* calcd for C<sub>26</sub>H<sub>34</sub>N<sub>3</sub>O<sub>6</sub> [M+H]<sup>+</sup> 484.2442 found 484.2436.

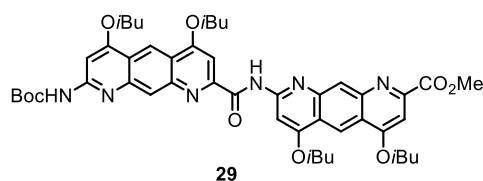

**Dimer 29.** Amine diazaanthracene **27** (500 mg, 1.26 mmol), acid diazaanthracene **20** (608 mg, 1.26 mmol) and PyBOP (1.31 g, 2.52 mmol) were dissolved in dry chloroform (10 mL). Then, DIEA (0.43 mL, 2.52 mmol) was added and the reaction mixture was let to stir at 45°C. After 12 hours, the reaction mixture was diluted with dichloromethane, washed with a saturated aqueous solution of NH<sub>4</sub>Cl, distilled water and brine then, the organic layer was dried over MgSO<sub>4</sub>, filtered and the solvent was removed under reduced pressure. The residue was dissolved in dichloromethane then, methanol was added and dichloromethane was slowly removed by rotary evaporation allowing precipitation of the dimer. The precipitate was filtered, washed with cold methanol on the filter and dried under vacuum to give **29** (940 mg, 87 %) as a yellow solid. <sup>1</sup>H NMR (300 MHz, CDCl<sub>3</sub>) δ ppm = 11.14 (s, 1H), 9.17 (s, 1H), 9.13 (s, 1H), 8.82 (s, 1H), 8.61 (s, 1H), 8.23 (s, 1H), 7.83 (s, 1H), 7.72 (s, 1H), 7.64 (s, 1H), 7.47 (s, 1H), 4.22 – 4.09 (m, 11H), 2.45 – 2.32 (m, 4H), 1.59 (s, 9H), 1.25 – 1.16 (m, 24H). <sup>13</sup>C NMR (75 MHz, CDCl<sub>3</sub>) δ ppm = 166.48, 163.98, 163.82, 163.39, 154.90, 153.62, 152.89, 151.77, 150.86, 147.98, 147.32, 147.15, 146.98, 126.73, 125.27, 120.81, 120.42, 119.57, 119.28, 116.67, 116.52, 98.22, 95.48, 93.54, 92.58, 81.60, 75.18, 75.07, 74.95, 53.42, 28.45, 19.35, 19.27. HRMS (ESI<sup>+</sup>): *m/z* calcd for C<sub>48</sub>H<sub>59</sub>N<sub>6</sub>O<sub>9</sub> [M+H]<sup>+</sup> 863.4338 found 863.4344.

### 3. Solution studies by NMR

#### 3.1 NMR study of monomer **9**

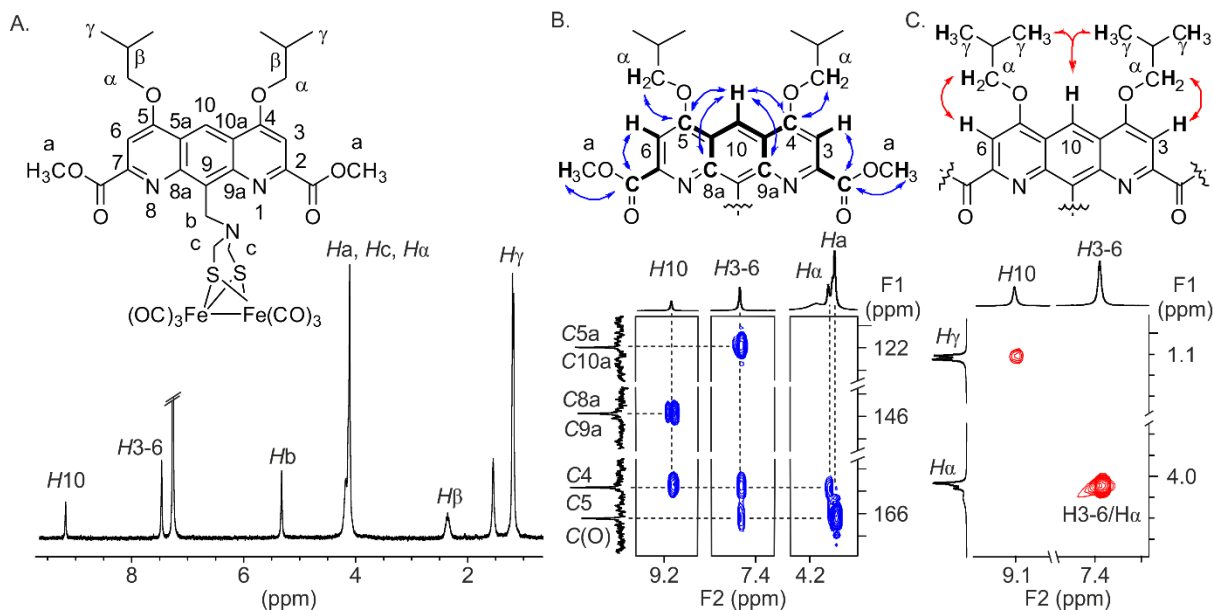

**Figure S1.** (A) Full  $^1\text{H}$  NMR spectrum (400 MHz) at 298 K of monomer **9** in  $\text{CDCl}_3$  with signals attribution. (B) Excerpt of HMBC spectrum (400 MHz) at 298 K of monomer **9** in  $\text{CDCl}_3$ . (C) Excerpt of  $^1\text{H}$ - $^1\text{H}$  NOESY spectrum (400 MHz,  $\tau = 300$  ms) at 298 K of monomer **9** in  $\text{CDCl}_3$  showing correlations between aromatic and lateral chain protons.

#### 3.2 NMR study of monomer **16**

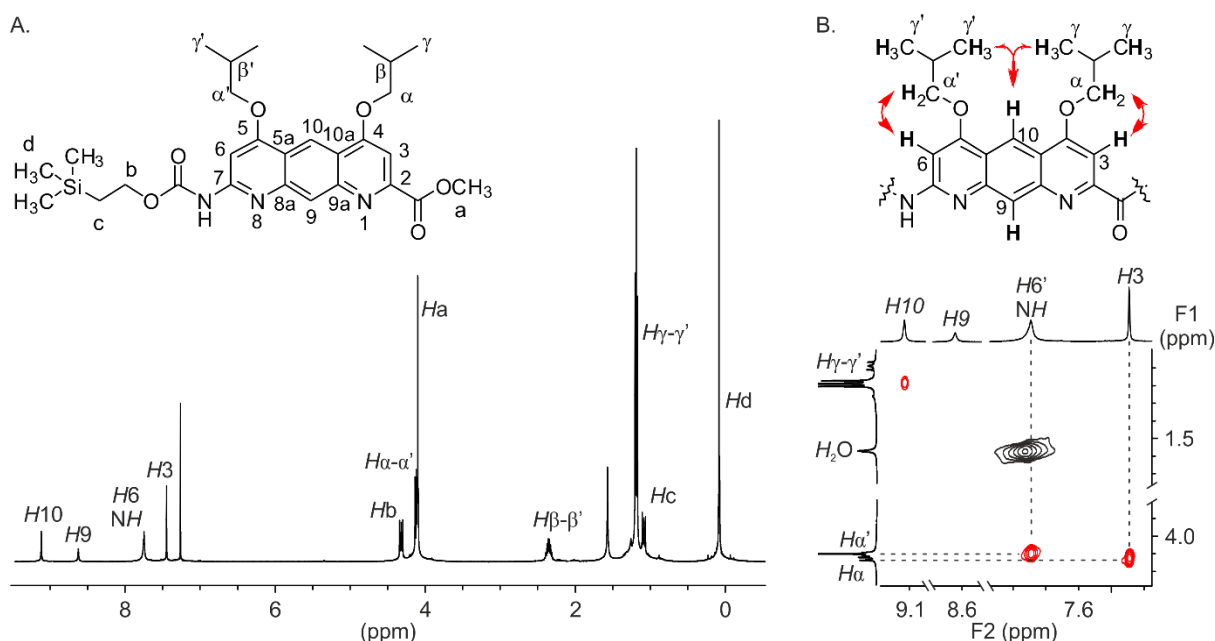

**Figure S2.** (A) Full  $^1\text{H}$  NMR spectrum (400 MHz) at 298 K of monomer **16** in  $\text{CDCl}_3$  with signals attribution. (B) Excerpt of  $^1\text{H}$ - $^1\text{H}$  NOESY spectrum (400 MHz,  $\tau = 300$  ms) at 298 K of monomer **16** in  $\text{CDCl}_3$  showing correlations between aromatic and lateral chain protons.

### 3.3 NMR study of dimer 20

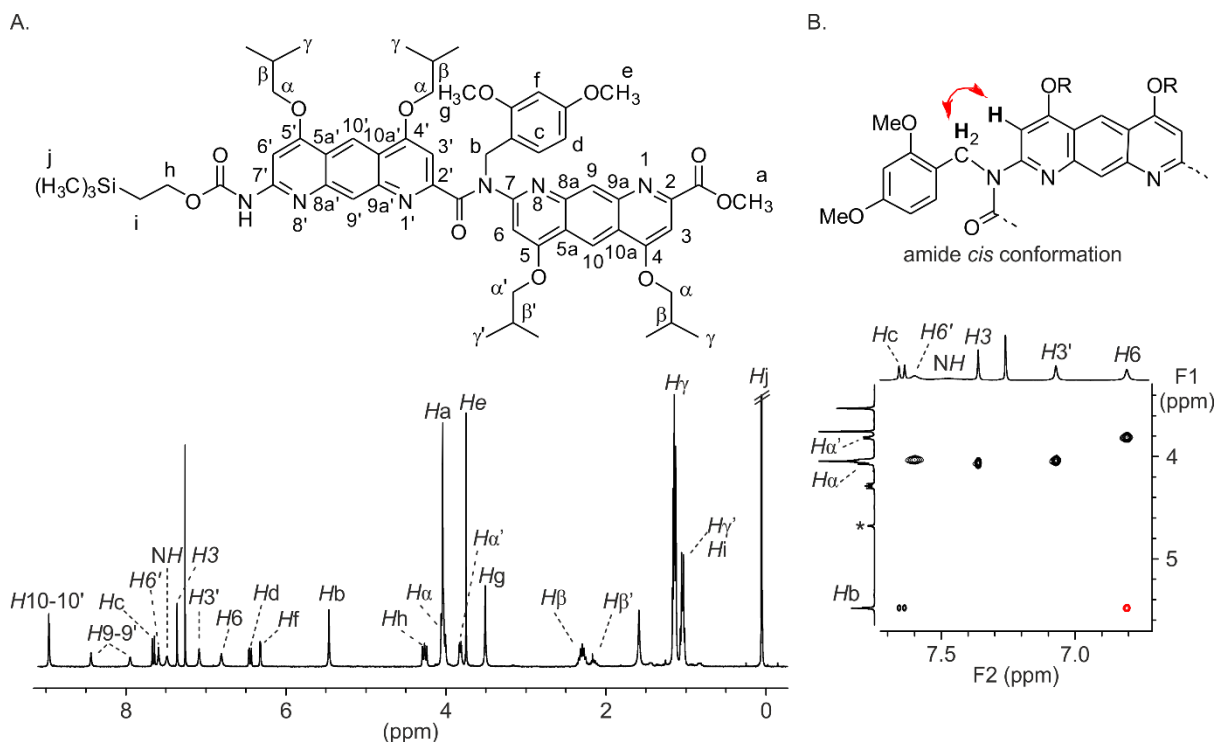

**Figure S3.** (A) Full  $^1\text{H}$  NMR spectrum (400 MHz) at 298 K of dimer **20** in  $\text{CDCl}_3$  with signals attribution. (B) Excerpt of  $^1\text{H}$ - $^1\text{H}$  NOESY spectrum (400 MHz,  $\tau = 300$  ms) at 298 K of dimer **20** in  $\text{CDCl}_3$  showing the correlation between the aromatic proton  $H6$  and the benzylic protons  $Hb$  in red due to tertiary amide *cis* conformation.

### 3.4 NMR comparison of dimer 20, tetramer 22 and oligomer 4

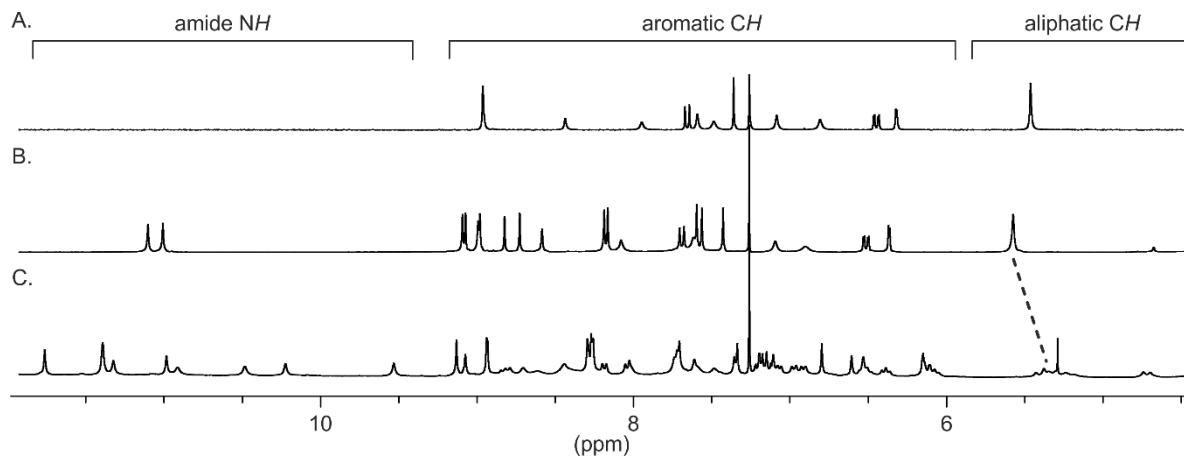

**Figure S4.** Part of  $^1\text{H}$  NMR spectrum (300 MHz) at 298 K in  $\text{CDCl}_3$  of dimer **20** (A), tetramer **22** (B) and oligomer **4** (C) with appearance of benzyl protons anisochronicity (dotted line).

### 3.5 NMR study of oligomer **5**

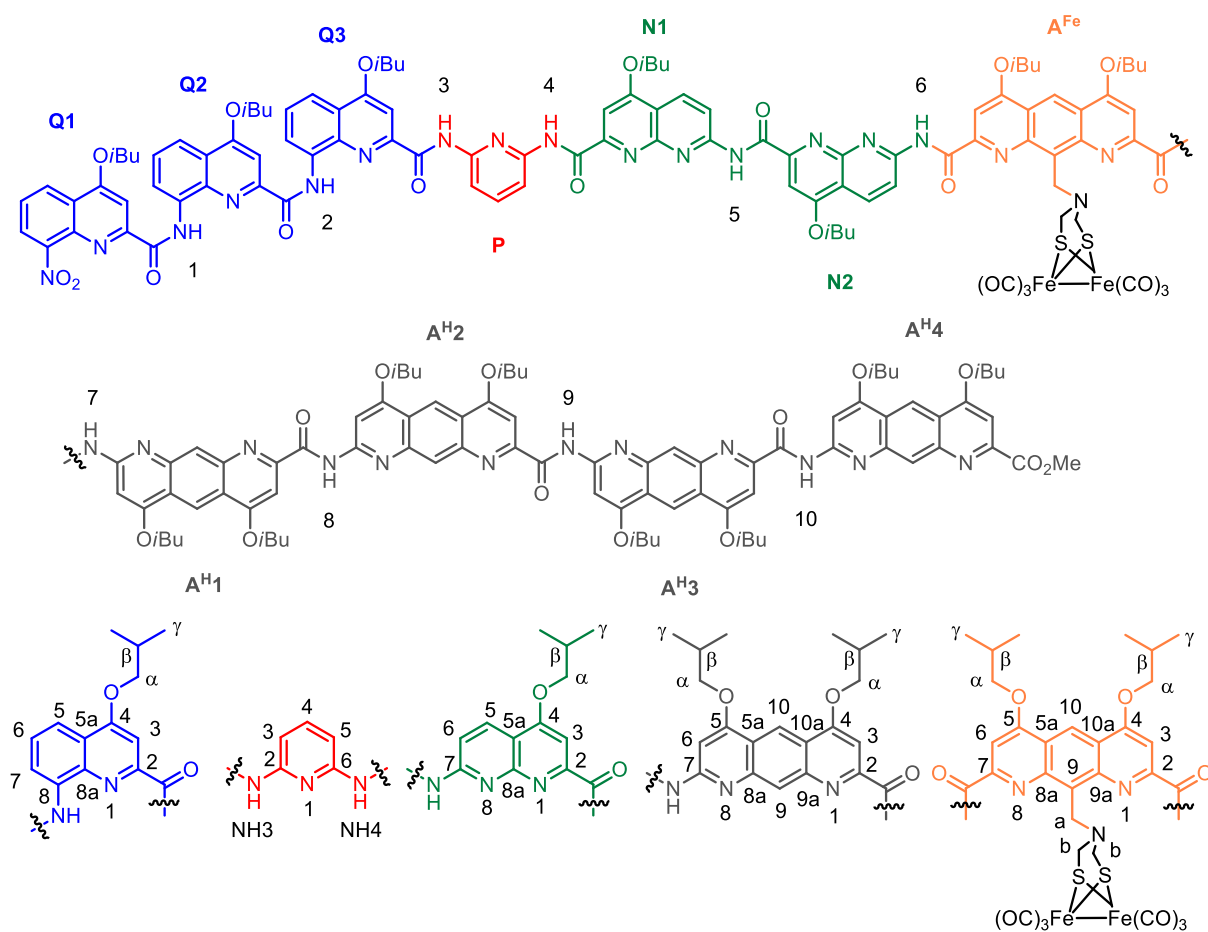

**Figure S5.** Monomers and atoms numbering for oligomer **5**.

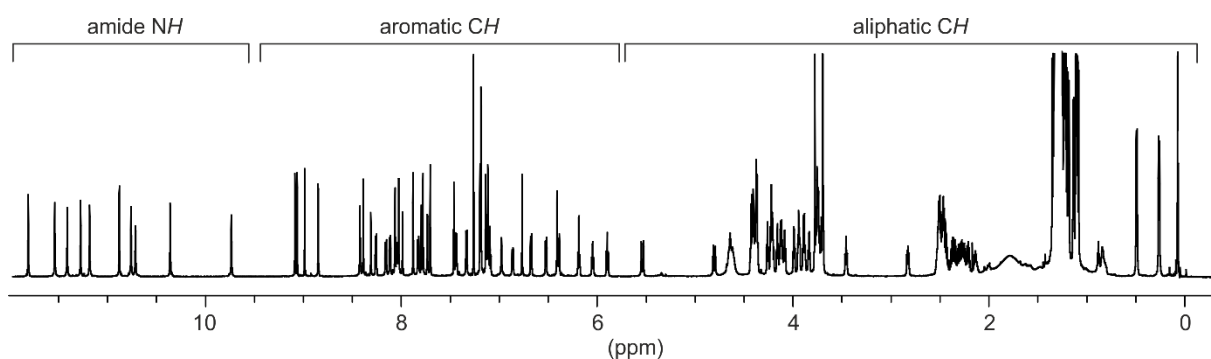

**Figure S6.** Full <sup>1</sup>H NMR spectrum (700 MHz) at 298 K of oligomer **5** in CDCl<sub>3</sub>.

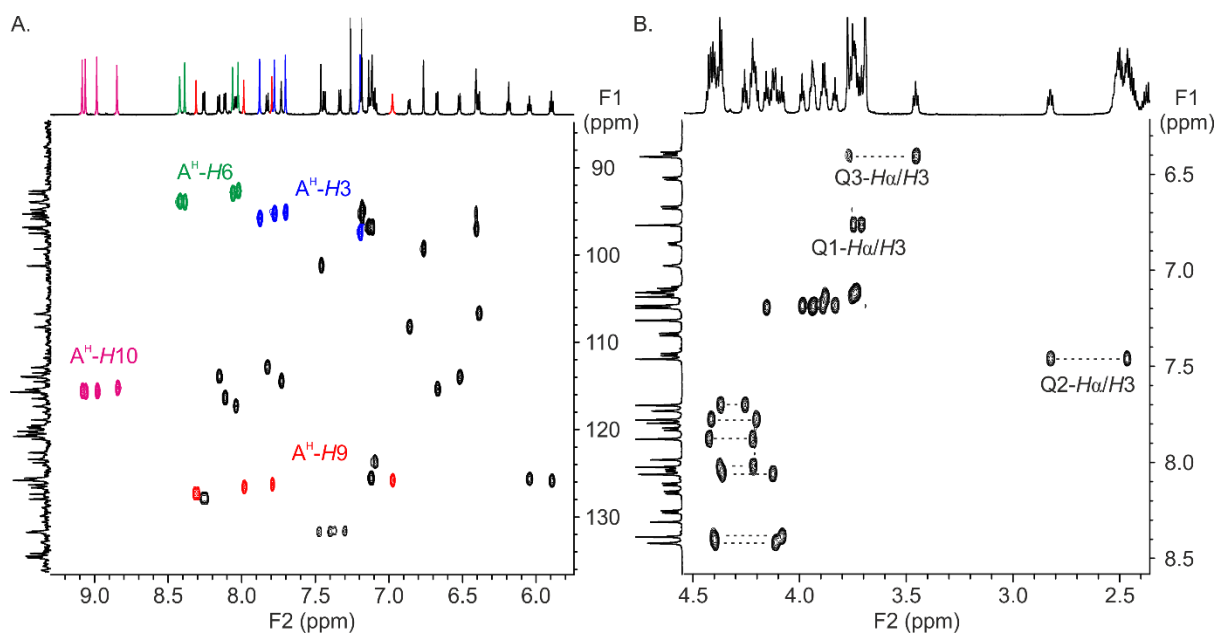

**Figure S7.** (A) Excerpt of HMBC spectrum (700 MHz) at 298 K of oligomer **5** in CDCl<sub>3</sub> showing the different aromatic protons from the A<sup>H</sup> units. (B) Excerpt of <sup>1</sup>H-<sup>1</sup>H NOESY spectrum (700 MHz, τ = 300 ms) at 298 K of oligomer **5** in CDCl<sub>3</sub> showing correlations between lateral chain protons H<sub>α</sub> due to anisochronicity.

**Table S1.** Partial attribution of  $^1\text{H}$  and  $^{13}\text{C}$  chemical shifts for oligomer **5** in  $\text{CDCl}_3$ , measured at 700 MHz and 176 MHz, respectively, 298 K.

|                                 | Chemical shift (ppm) |                 |                                          | Chemical shift (ppm) |                 |                                  | Chemical shift (ppm) |                 |
|---------------------------------|----------------------|-----------------|------------------------------------------|----------------------|-----------------|----------------------------------|----------------------|-----------------|
|                                 | $^1\text{H}$         | $^{13}\text{C}$ |                                          | $^1\text{H}$         | $^{13}\text{C}$ |                                  | $^1\text{H}$         | $^{13}\text{C}$ |
| <i>Q1-CH7</i>                   | 7.11 (d)             | 125.7           | <i>NH3</i>                               | 9.73 (s)             |                 |                                  | 11.27 (s)            |                 |
| <i>Q1-CH6</i>                   | 7.09 (t)             | 123.5           | <i>P-CH3</i>                             | 6.38 (d)             | 106.7           | <i>NH8,9,10</i>                  | 10.80 (s)            |                 |
| <i>Q1-CH5</i>                   | 8.25 (d)             | 127.7           | <i>P-CH4</i>                             | 6.18 (t)             | 137.1           |                                  | 10.35 (s)            |                 |
| <i>Q1-CH3</i>                   | 6.76 (s)             | 99.2            | <i>P-CH5</i>                             | 6.85 (d)             | 108.2           | <i>A<sup>H</sup>1-CH6</i>        | 8.02 (s)             | 92.6            |
| <i>Q1-C4</i>                    |                      | 162.3           | <i>NH4</i>                               | 10.71 (s)            |                 |                                  | 8.06 (s)             | 92.7            |
| <i>Q1-C10</i>                   |                      | 123.3           | <i>N1-CH3</i>                            | 7.13 (s)             | 96.7            | <i>A<sup>H</sup>2,3,4-CH6</i>    | 8.42 (s)             | 93.7            |
| <i>Q1-CH<math>\alpha</math></i> | 3.70 (t)<br>3.74 (t) | 74.9            | <i>N1-CH5</i>                            | 7.33 (d)             | 131             |                                  | 8.38 (s)             | 93.8            |
| <i>NH1</i>                      | 11.80 (s)            |                 | <i>N1-CH6</i>                            | 7.82 (d)             | 112.8           |                                  | 7.70 (s)             | 95              |
| <i>Q2-CH7</i>                   | 8.11 (d)             | 116.6           | <i>N1-C5a</i>                            |                      | 113.5           | <i>A<sup>H</sup>1,2,3-CH3</i>    | 7.77 (s)             | 95.1            |
| <i>Q2-CH6</i>                   | 5.89 (t)             | 125.9           | <i>N1-CH<math>_2\alpha</math></i>        | 3.75 (t)             | 75              |                                  | 7.87 (s)             | 95.7            |
| <i>Q2-CH5</i>                   | 6.68 (d)             | 115.2           | <i>NH5</i>                               | 11.40 (s)            |                 | <i>A<sup>H</sup>4-CH3</i>        | 7.19 (s)             | 97.4            |
| <i>Q2-CH3</i>                   | 7.46 (s)             | 101.3           | <i>N2-CH3</i>                            | 7.11 (s)             | 96.8            |                                  | 8.31 (s)             | 127.3           |
| <i>Q2-C4</i>                    |                      | 163.4           | <i>N2-CH5</i>                            | 7.44 (d)             | 131             |                                  | 7.98 (s)             | 126.5           |
| <i>Q2-C10</i>                   |                      | 122.2           | <i>N2-CH6</i>                            | 8.15 (d)             | 113.8           | <i>A<sup>H</sup>1,2,3,4-CH9</i>  | 7.79 (s)             | 126.2           |
| <i>Q2-CH<math>\alpha</math></i> | 2.82 (t)<br>2.46 (t) | 75              | <i>N2-C5a</i>                            |                      | 113.9           |                                  | 6.97 (s)             | 125.7           |
| <i>NH2</i>                      | 11.53                |                 | <i>N2-CH<math>_2\alpha</math></i>        | 3.74 (t)             | 75              |                                  | 9.08 (s)             | 115.5           |
| <i>Q3-CH7</i>                   | 8.04 (d)             | 117.3           | <i>NH6</i>                               | 11.18 (s)            |                 |                                  | 9.06 (s)             | 115.6           |
| <i>Q3-CH6</i>                   | 6.04 (t)             | 125.5           | <i>A<sup>Fe</sup>-CH3/CH6</i>            | 7.18 (s)             | 95              | <i>A<sup>H</sup>1,2,3,4-CH10</i> | 8.98 (s)             | 115.5           |
| <i>Q3-CH5</i>                   | 6.52 (d)             | 113.9           | <i>A<sup>Fe</sup>-CH10</i>               | 7.73 (s)             | 114.5           |                                  | 8.84(s)              | 115.2           |
| <i>Q3-CH3</i>                   | 6.40 (s)             | 95.2            |                                          | 4.80 (d)             |                 | <i>CH<math>_3</math>-Ester</i>   | 3.69 (s)             | 52.9            |
| <i>Q3-C4</i>                    |                      | 161.5           | <i>A<sup>Fe</sup>-CH<math>_2a</math></i> | 5.53 (d)             | 50.5            |                                  |                      |                 |
| <i>Q3-C10</i>                   |                      | 120.5           | <i>A<sup>Fe</sup>-CH<math>_2b</math></i> | 4.63 (m)             | 54.5            |                                  |                      |                 |
| <i>Q3-CH<math>\alpha</math></i> | 3.45 (t)<br>3.76 (t) | 74.6            | <i>NH7</i>                               | 10.75 (s)            |                 |                                  |                      |                 |



### 3.6 Full Width at Half Maximum of carbonyl ligand signals

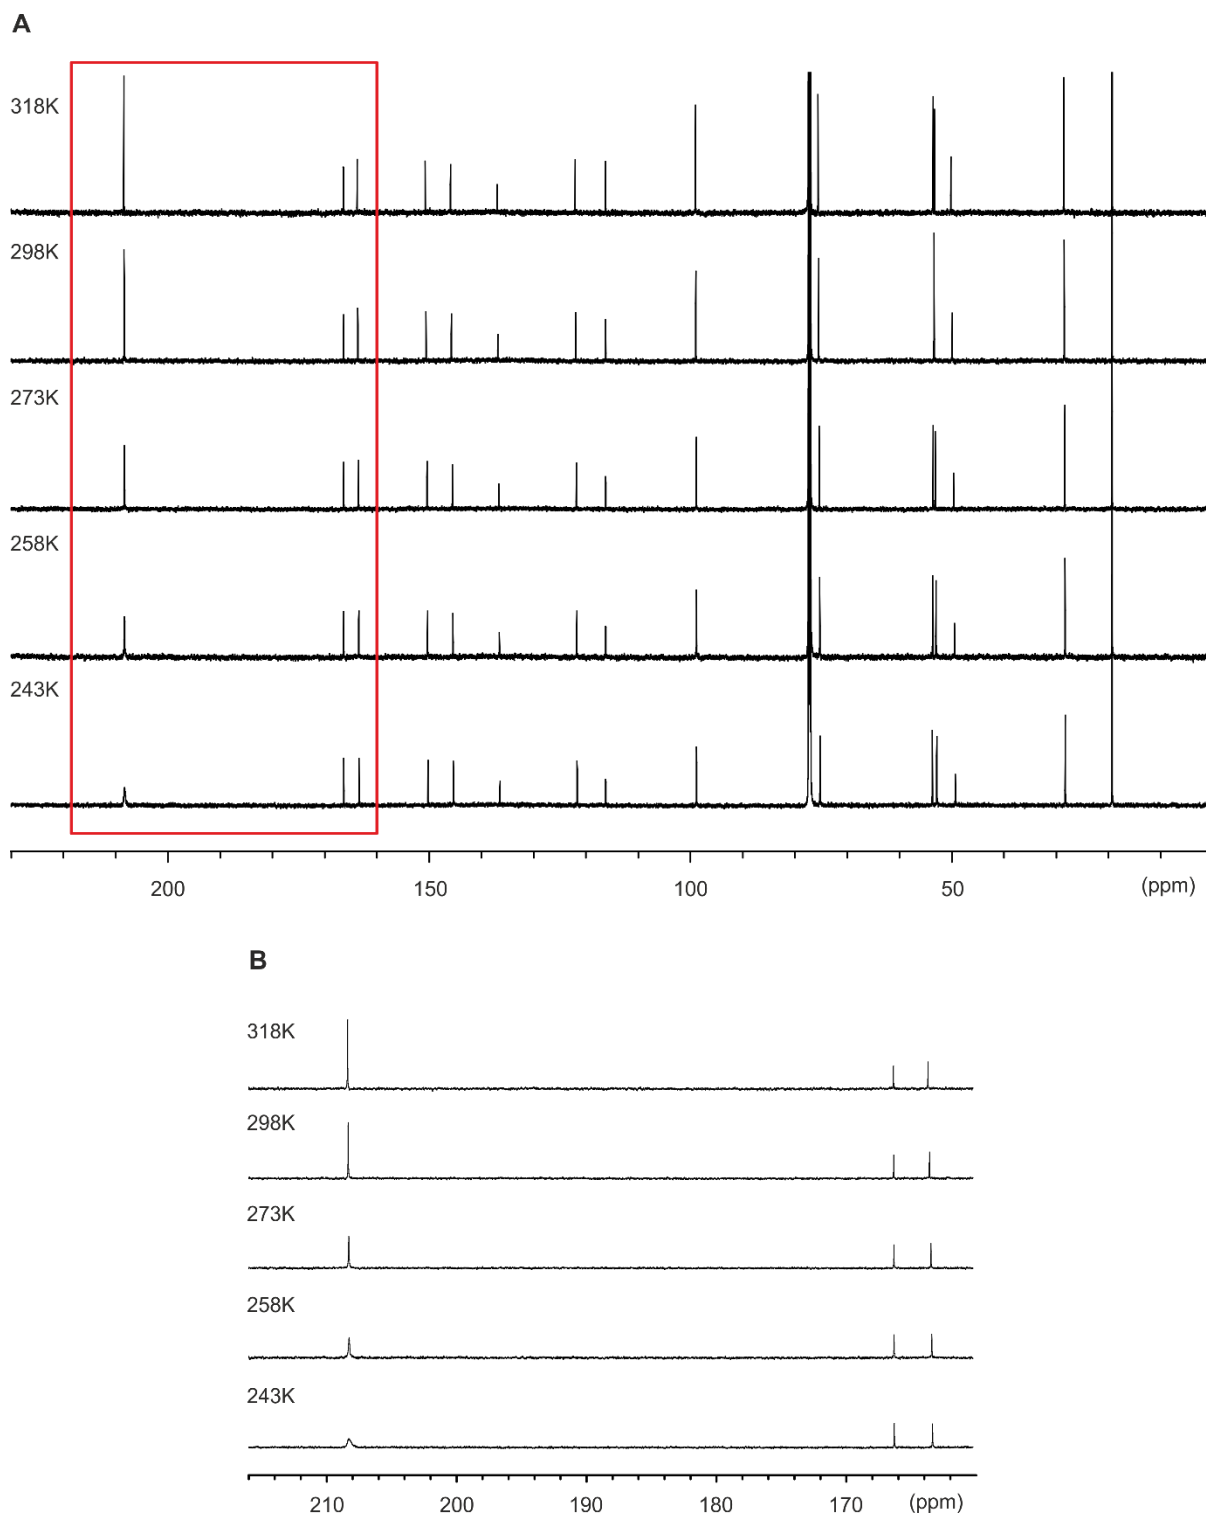

**Figure S8.** (A) Full  $^{13}\text{C}$  NMR spectra (176 MHz) of monomer **9** in  $\text{CDCl}_3$  at variable temperatures. (B) Excerpt of  $^{13}\text{C}$  NMR spectra (176 MHz) of monomer **9** in  $\text{CDCl}_3$  at variable temperatures.

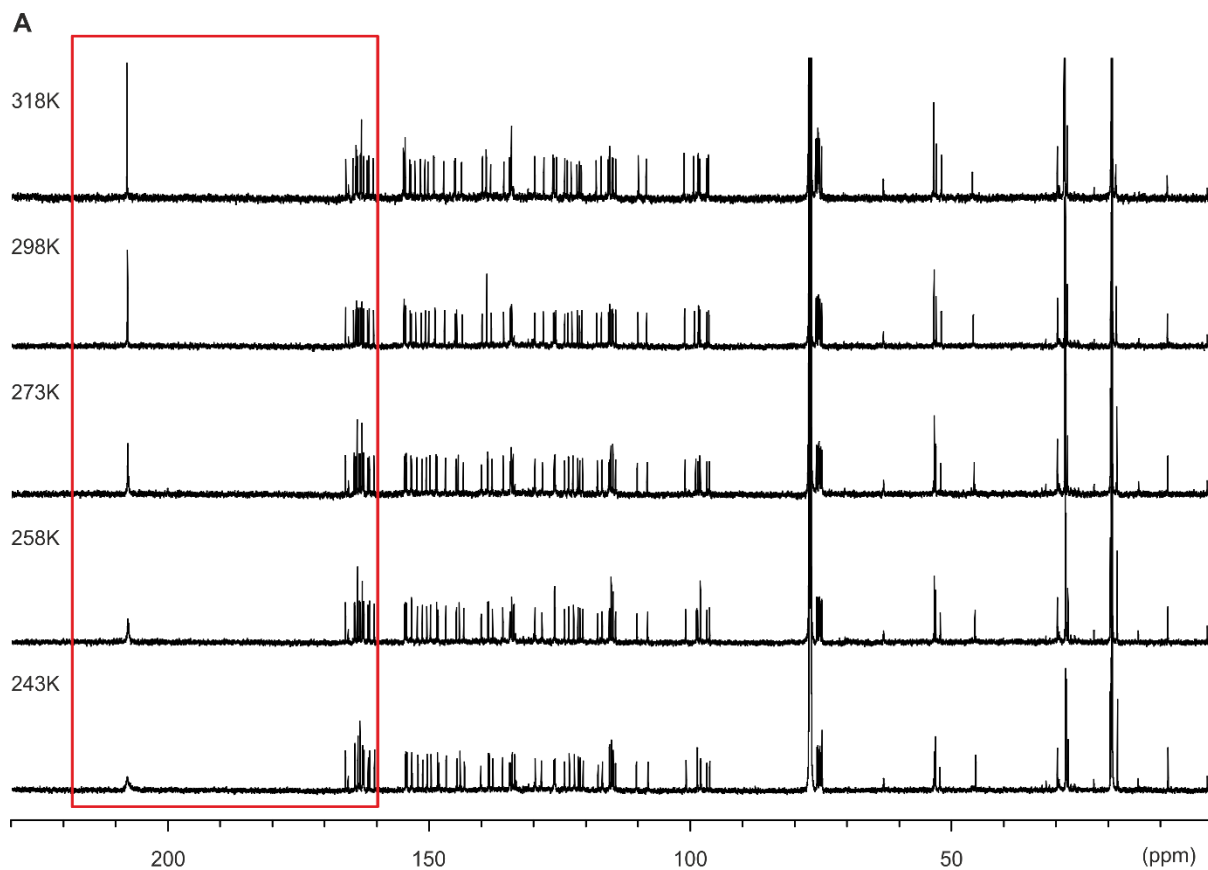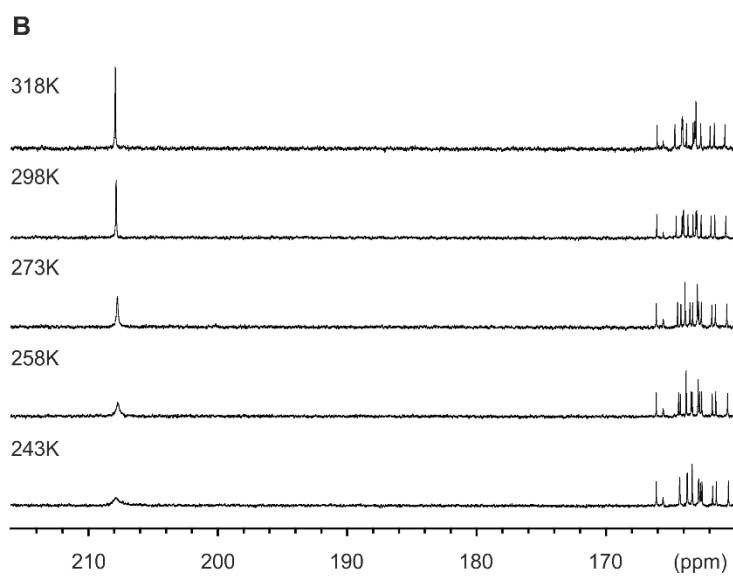

**Figure S9.** (A) Full  $^{13}\text{C}$  NMR spectra (176 MHz) of oligomer **1** in  $\text{CDCl}_3$  at variable temperatures. (B) Excerpt of  $^{13}\text{C}$  NMR spectra (176 MHz) of oligomer **1** in  $\text{CDCl}_3$  at variable temperatures.

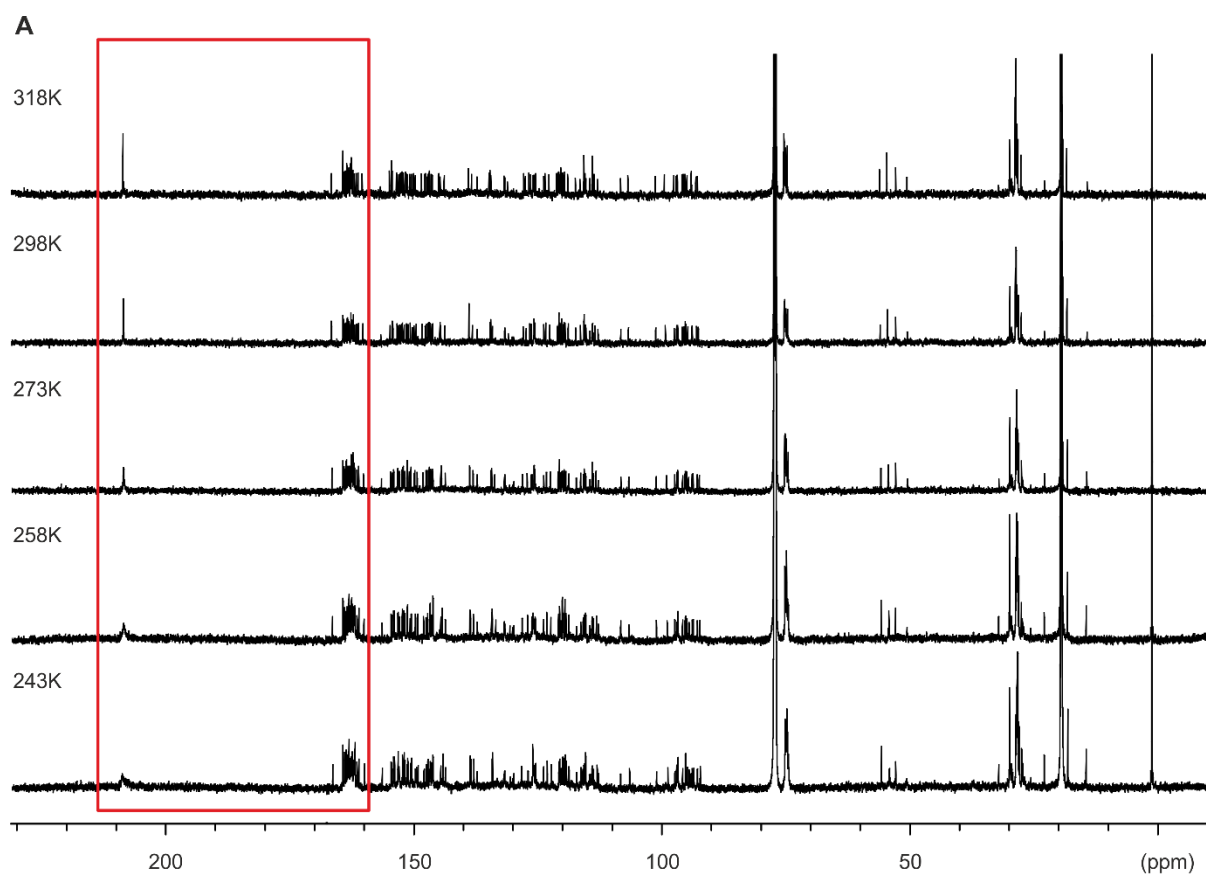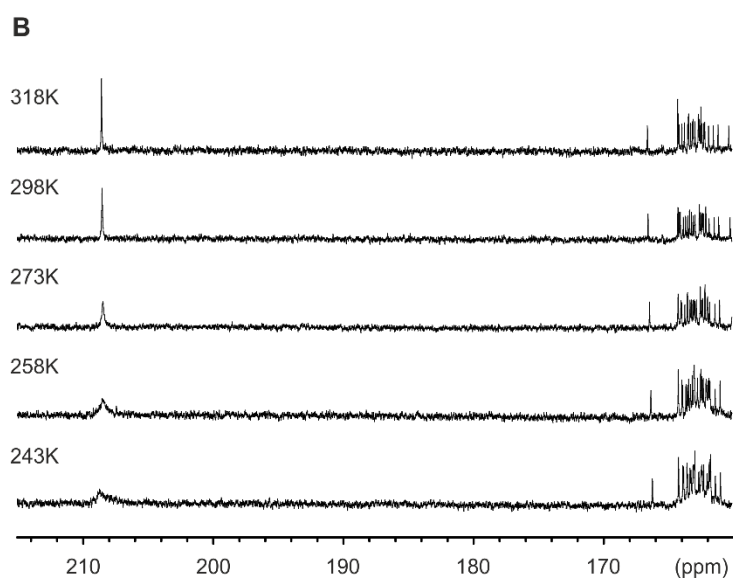

**Figure S10.** (A) Full  $^{13}\text{C}$  NMR spectra (176 MHz) of oligomer **5** in  $\text{CDCl}_3$  at variable temperatures. (B) Excerpt of  $^{13}\text{C}$  NMR spectra (176 MHz) of oligomer **5** in  $\text{CDCl}_3$  at variable temperatures.

## 4. Solid state X-Ray Crystallography

### 4.1 X-Ray crystallographic data for compound 1

**Table S2.** Crystal data and refinement details for compound 1.

|                                                      |                                                                                                            |
|------------------------------------------------------|------------------------------------------------------------------------------------------------------------|
| <i>Identification code</i>                           | <b>1</b>                                                                                                   |
| <i>Chemical formula</i>                              | <b>C<sub>107</sub>H<sub>105</sub>Cl<sub>9</sub>Fe<sub>2</sub>N<sub>19</sub>O<sub>23</sub>S<sub>2</sub></b> |
| <i>Formula weight</i>                                | 2159.96                                                                                                    |
| <i>Temperature (K)</i>                               | 130                                                                                                        |
| <i>Wavelength (Å)</i>                                | 1.54178                                                                                                    |
| <i>Crystal system</i>                                | monoclinic                                                                                                 |
| <i>Space group</i>                                   | C2/c                                                                                                       |
| <i>Unit cell dimensions<br/>(a,b,c,α,β,γ) (Å, °)</i> | 42.379, 22.277, 31.801, 90.0, 98.36, 90.0                                                                  |
| <i>Volume (Å<sup>3</sup>)</i>                        | 29703.8                                                                                                    |
| <i>Z</i>                                             | 8                                                                                                          |
| <i>Density (calculated)</i>                          | 1.127                                                                                                      |
| <i>Absorption coefficient</i>                        | 3.826                                                                                                      |
| <i>Absorption correction</i>                         | multiscan                                                                                                  |
| <i>Crystal size (mm)</i>                             | 0.10, 0.10, 0.10                                                                                           |
| <i>Index ranges</i>                                  | -39 ≤ h ≤ 40, -21 ≤ k ≤ 16, -22 ≤ l ≤ 30                                                                   |
| <i>Completeness to theta = 22.72°</i>                | 0.988                                                                                                      |
| <i>Reflections collected</i>                         | 46092                                                                                                      |
| <i>Reflections observed [I &gt; 2σ(I)]</i>           | 13285                                                                                                      |
| <i>R<sub>int</sub></i>                               | 0.1018                                                                                                     |
| <i>Data/parameters/restraints</i>                    | 13285/1474/27                                                                                              |
| <i>Goodness-of-fit on F<sup>2</sup></i>              | 1.132                                                                                                      |
| <i>Final R indices [I &gt; 2σ(I)]</i>                | 0.1284                                                                                                     |
| <i>R indices (all data)</i>                          | 0.1747                                                                                                     |
| <i>Largest diff. peak and hole</i>                   | 0.47/-0.46                                                                                                 |
| <i>CCDC #</i>                                        | 2031551                                                                                                    |

\*SQUEEZE procedure was used to remove severely disordered solvent molecules

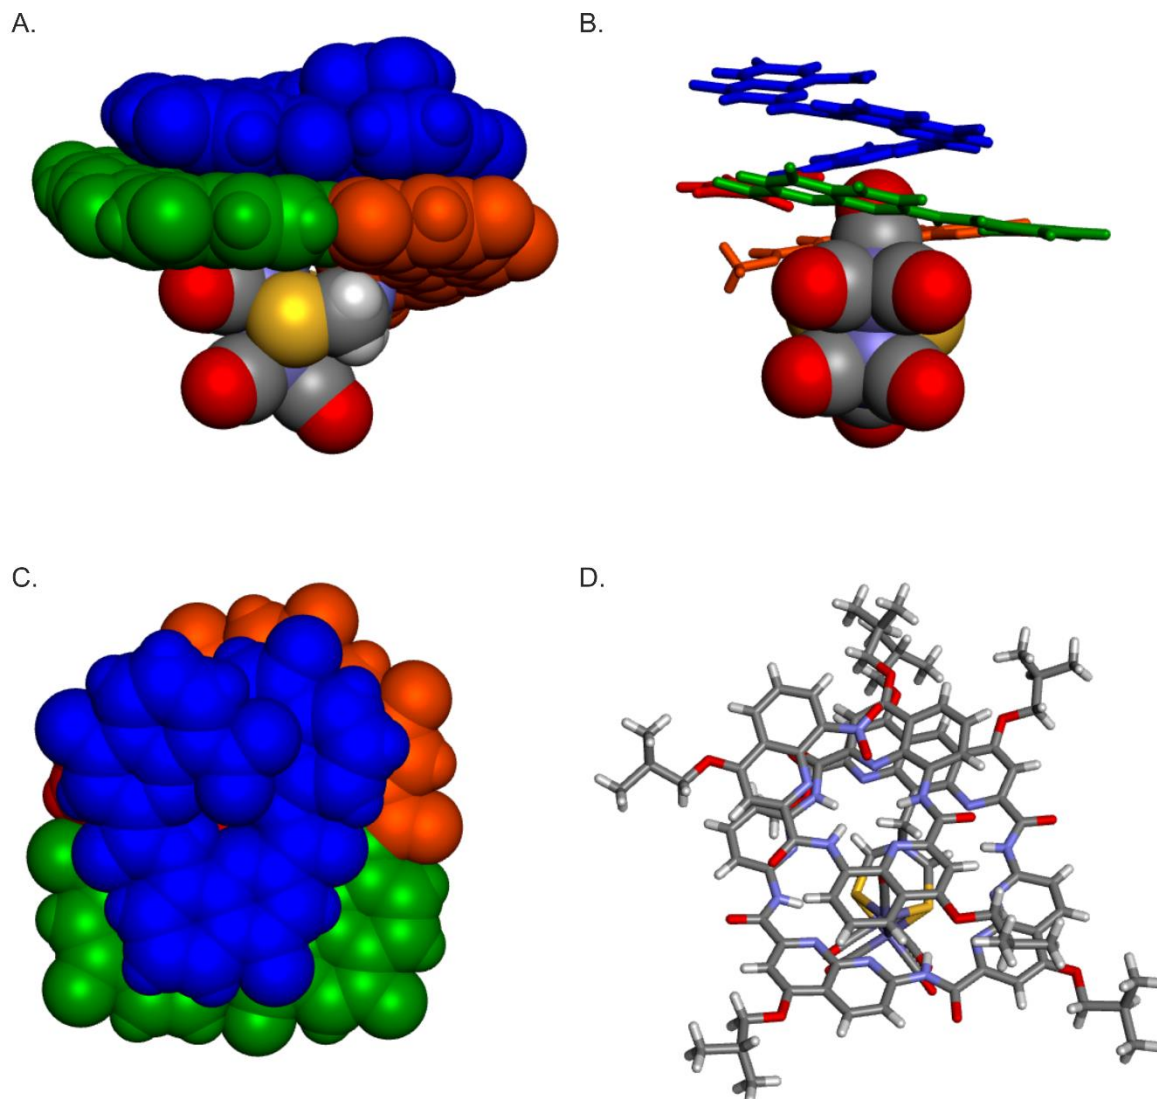

**Figure S11.** Crystal structure views of oligomer **1**. (A) side view, (B) front view, (C) view from above in CPK representations. Monomers are color coded as in manuscript and isobutoxy side chains are omitted for clarity. (D) view from above in tube representation where isobutoxy side chains are shown and atoms are color coded in grey for carbon, red for oxygen, blue for nitrogen, white for hydrogen, yellow for sulfur and purple for iron.

## 4.2 X-Ray crystallographic data for compound 3

**Table S3.** Crystal data and refinement details for compound 3.

|                                                      |                                             |
|------------------------------------------------------|---------------------------------------------|
| <i>Identification code</i>                           | <b>3</b>                                    |
| <i>Chemical formula</i>                              | C148 H150 Cl3 Fe2 N24 O29 S2                |
| <i>Formula weight</i>                                | 2890                                        |
| <i>Temperature (K)</i>                               | 100                                         |
| <i>Wavelength (Å)</i>                                | 0.8100                                      |
| <i>Crystal system</i>                                | triclinic                                   |
| <i>Space group</i>                                   | P-1                                         |
| <i>Unit cell dimensions<br/>(a,b,c,α,β,γ) (Å, °)</i> | 17.679, 22.049, 25.574, 72.80, 73.10, 79.75 |
| <i>Volume (Å<sup>3</sup>)</i>                        | 9065.6                                      |
| <i>Z</i>                                             | 2                                           |
| <i>Density (calculated)</i>                          | 1.102                                       |
| <i>Absorption coefficient</i>                        | 0.413                                       |
| <i>Absorption correction</i>                         | None                                        |
| <i>Crystal size (mm)</i>                             | 0.10, 0.05, 0.07                            |
| <i>Index ranges</i>                                  | -19 < h < 19, -24 < k < 24, -28 < l < 28    |
| <i>Completeness to theta = 27.06°</i>                | 0.913                                       |
| <i>Reflections collected</i>                         | 94230                                       |
| <i>Reflections observed [I &gt; 2σ(I)]</i>           | 15839                                       |
| <i>R<sub>int</sub></i>                               | 0.0576                                      |
| <i>Data/parameters/restraints</i>                    | 24578/1917/1707                             |
| <i>Goodness-of-fit on F<sup>2</sup></i>              | 1.367                                       |
| <i>Final R indices [I &gt; 2σ(I)]</i>                | 0.1129                                      |
| <i>R indices (all data)</i>                          | 0.1384                                      |
| <i>Largest diff. peak and hole</i>                   | 1.14/-0.45                                  |
| <i>CCDC #</i>                                        | 2031556                                     |

\*SQUEEZE procedure was used to remove severely disordered solvent molecules

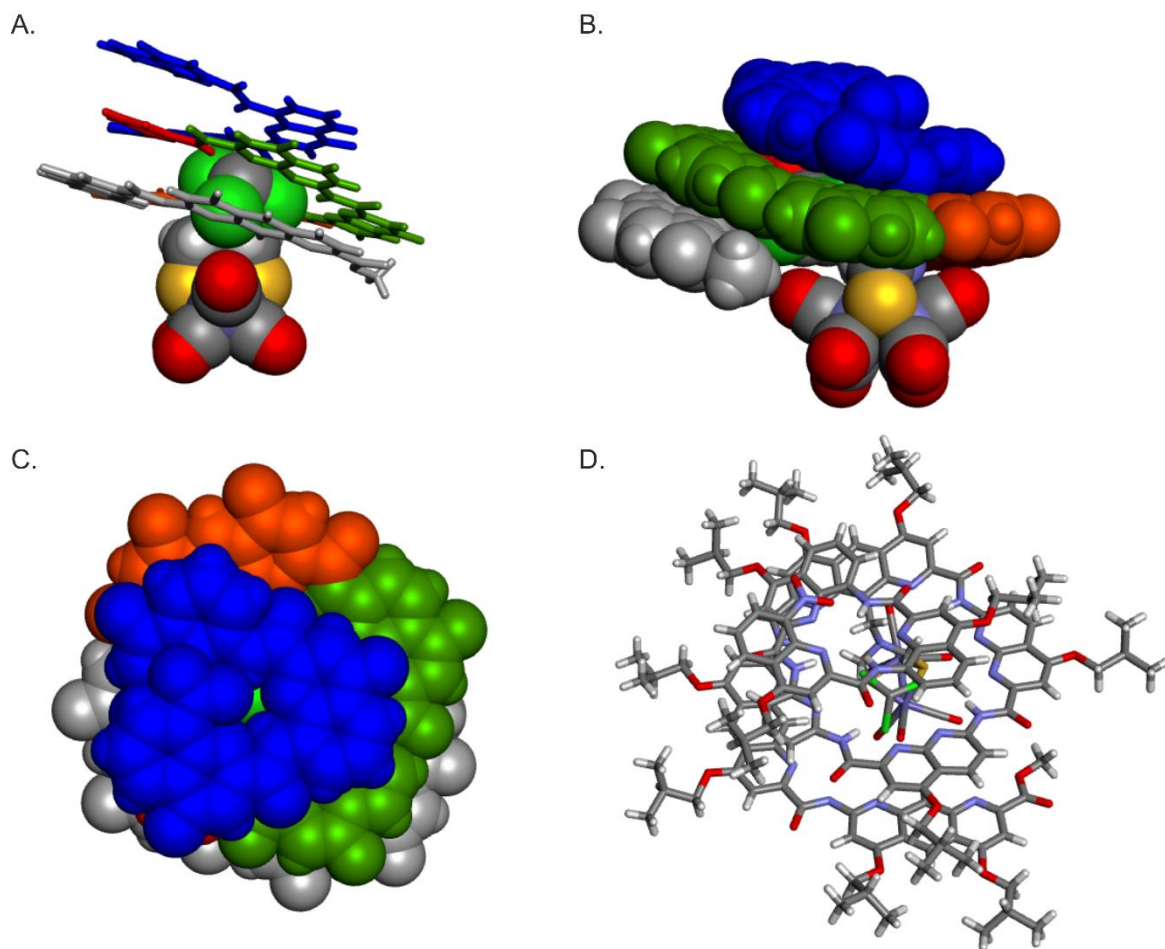

**Figure S12.** Crystal structure views of oligomer **3**. (A) front view where the aromatic backbone is shown in color coded tube representation whereas the metal complex is show in CPK representation. (B) side view in CPK representation. (C) view from above in CPK representation. Monomers are color coded as in manuscript and isobutoxy side chains are omitted for clarity. (D) view from above in tube representation where isobutoxy side chains are shown and atoms are color coded in grey for carbon, red for oxygen, blue for nitrogen, white for hydrogen, yellow for sulfur and purple for iron.

### 4.3 X-Ray crystallographic data for compound 4

**Table S4.** Crystal data and refinement details for compound 4.

|                                                      |                                             |
|------------------------------------------------------|---------------------------------------------|
| <i>Identification code</i>                           | 4                                           |
| <i>Chemical formula</i>                              | C198 H204 Fe2 N30 O37 S2                    |
| <i>Formula weight</i>                                | 4010.48                                     |
| <i>Temperature (K)</i>                               | 100                                         |
| <i>Wavelength (Å)</i>                                | 1.54178                                     |
| <i>Crystal system</i>                                | triclinic                                   |
| <i>Space group</i>                                   | P-1                                         |
| <i>Unit cell dimensions<br/>(a,b,c,α,β,γ) (Å, °)</i> | 26.612, 29.084, 36.118, 83.26, 82.98, 68.18 |
| <i>Volume (Å<sup>3</sup>)</i>                        | 25678                                       |
| <i>Z</i>                                             | 4                                           |
| <i>Density (calculated)</i>                          | 1.037                                       |
| <i>Absorption coefficient</i>                        | 2.15                                        |
| <i>Absorption correction</i>                         | multiscan                                   |
| <i>Crystal size</i>                                  | 0.10, 0.10, 0.01                            |
| <i>Index ranges</i>                                  | -20 < h < 24, -22 < k < 26, -29 < l < 32    |
| <i>Completeness to theta = 44.28°</i>                | 0.897                                       |
| <i>Reflections collected</i>                         | 35867                                       |
| <i>Reflections observed [I &gt; 2σ(I)]</i>           | 9759                                        |
| <i>R<sub>int</sub></i>                               | 0.1147                                      |
| <i>Data/parameters/restraints</i>                    | 35867/4990/8374                             |
| <i>Goodness-of-fit on F<sup>2</sup></i>              | 1.088                                       |
| <i>Final R indices [I &gt; 2σ(I)]</i>                | 0.1170                                      |
| <i>R indices (all data)</i>                          | 0.2194                                      |
| <i>Largest diff. peak and hole</i>                   | +0.27/-0.26                                 |
| <i>CCDC #</i>                                        | 2031552                                     |

\*SQUEEZE procedure was used to remove severely disordered solvent molecules



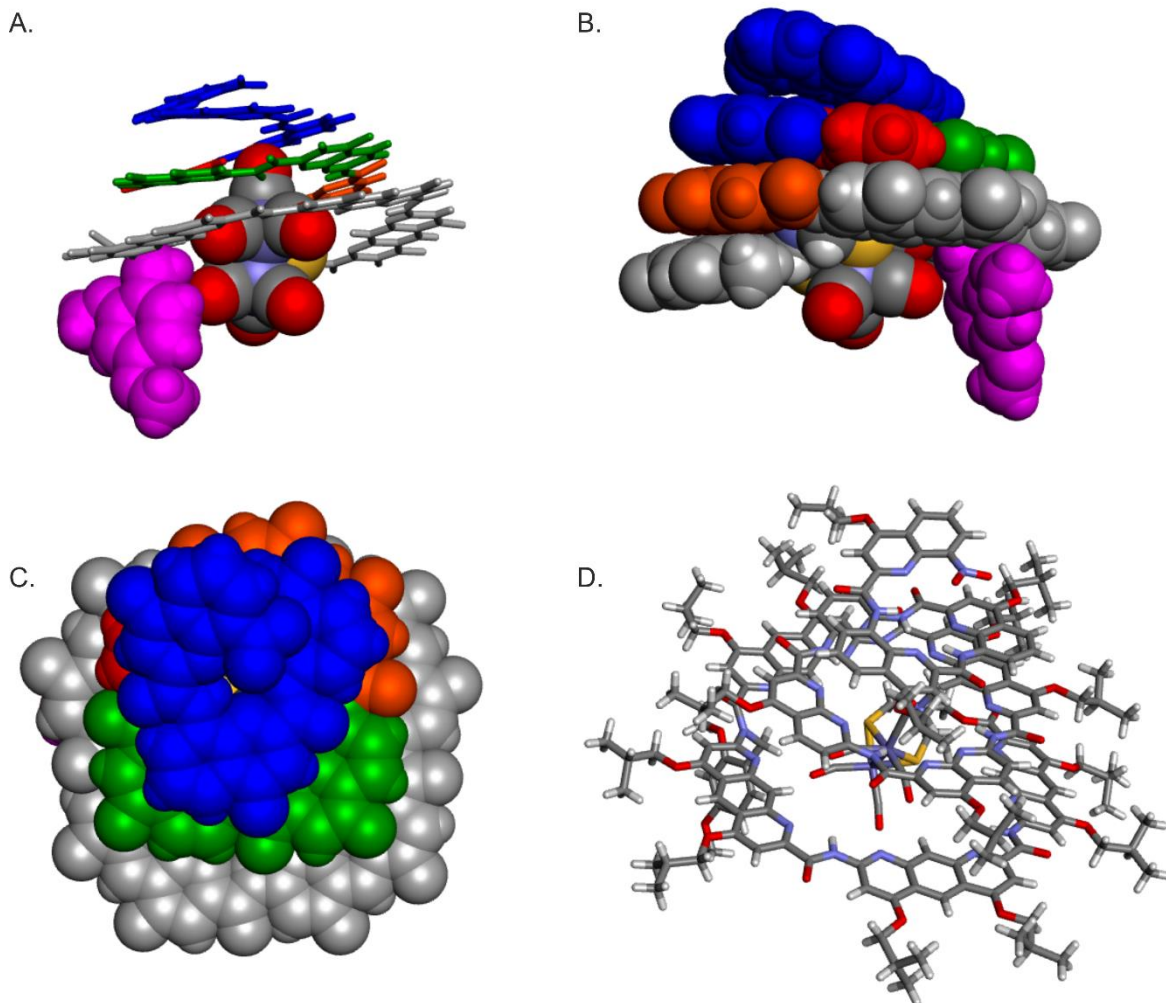

**Figure S13.** Crystal structure views of oligomer 4. (A) front view where the aromatic backbone is shown in color coded tube representation whereas the metal complex and DMB group are shown in CPK representation. (B) side view in CPK representation. (C) view from above in CPK representation. Monomers are color coded as in manuscript and isobutoxy side chains are omitted for clarity. (D) view from above in tube representation where isobutoxy side chains are shown and atoms are color coded in grey for carbon, red for oxygen, blue for nitrogen, white for hydrogen, yellow for sulfur and purple for iron.

#### 4.4 X-Ray crystallographic data for compound 5

**Table S5.** Crystal data and refinement details for compound 5.

|                                                      |                                                 |
|------------------------------------------------------|-------------------------------------------------|
| <i>Identification code</i>                           | 5                                               |
| <i>Chemical formula</i>                              | C195 H198 Cl13 Fe2 N30 O35 S2                   |
| <i>Formula weight</i>                                | 3733.12                                         |
| <i>Temperature (K)</i>                               | 130                                             |
| <i>Wavelength (Å)</i>                                | 1.54178                                         |
| <i>Crystal system</i>                                | triclinic                                       |
| <i>Space group</i>                                   | P-1                                             |
| <i>Unit cell dimensions<br/>(a,b,c,α,β,γ) (Å, °)</i> | 17.496, 21.656, 33.846, 97.71, 104.52,<br>97.62 |
| <i>Volume (Å<sup>3</sup>)</i>                        | 12116                                           |
| <i>Z</i>                                             | 2                                               |
| <i>Density (calculated)</i>                          | 1.023                                           |
| <i>Absorption coefficient</i>                        | 1.744                                           |
| <i>Absorption correction</i>                         | multiscan                                       |
| <i>Crystal size</i>                                  | 0.20, 0.20, 0.2                                 |
| <i>Index ranges</i>                                  | -15 < h < 15, -19 < k < 19, -30 < l < 30        |
| <i>Completeness to theta = 51.33°</i>                | 0.987                                           |
| <i>Reflections collected</i>                         | 78733                                           |
| <i>Reflections observed [I &gt; 2σ(I)]</i>           | 18810                                           |
| <i>R<sub>int</sub></i>                               | 0.1429                                          |
| <i>Data/parameters/restraints</i>                    | 18810/2417/231                                  |
| <i>Goodness-of-fit on F<sup>2</sup></i>              | 0.85                                            |
| <i>Final R indices [I &gt; 2σ(I)]</i>                | 0.0890                                          |
| <i>R indices (all data)</i>                          | 0.1555                                          |
| <i>Largest diff. peak and hole</i>                   | +0.44/-0.32                                     |
| <i>CCDC #</i>                                        | 2031555                                         |

\*SQUEEZE procedure was used to remove severely disordered solvent molecules

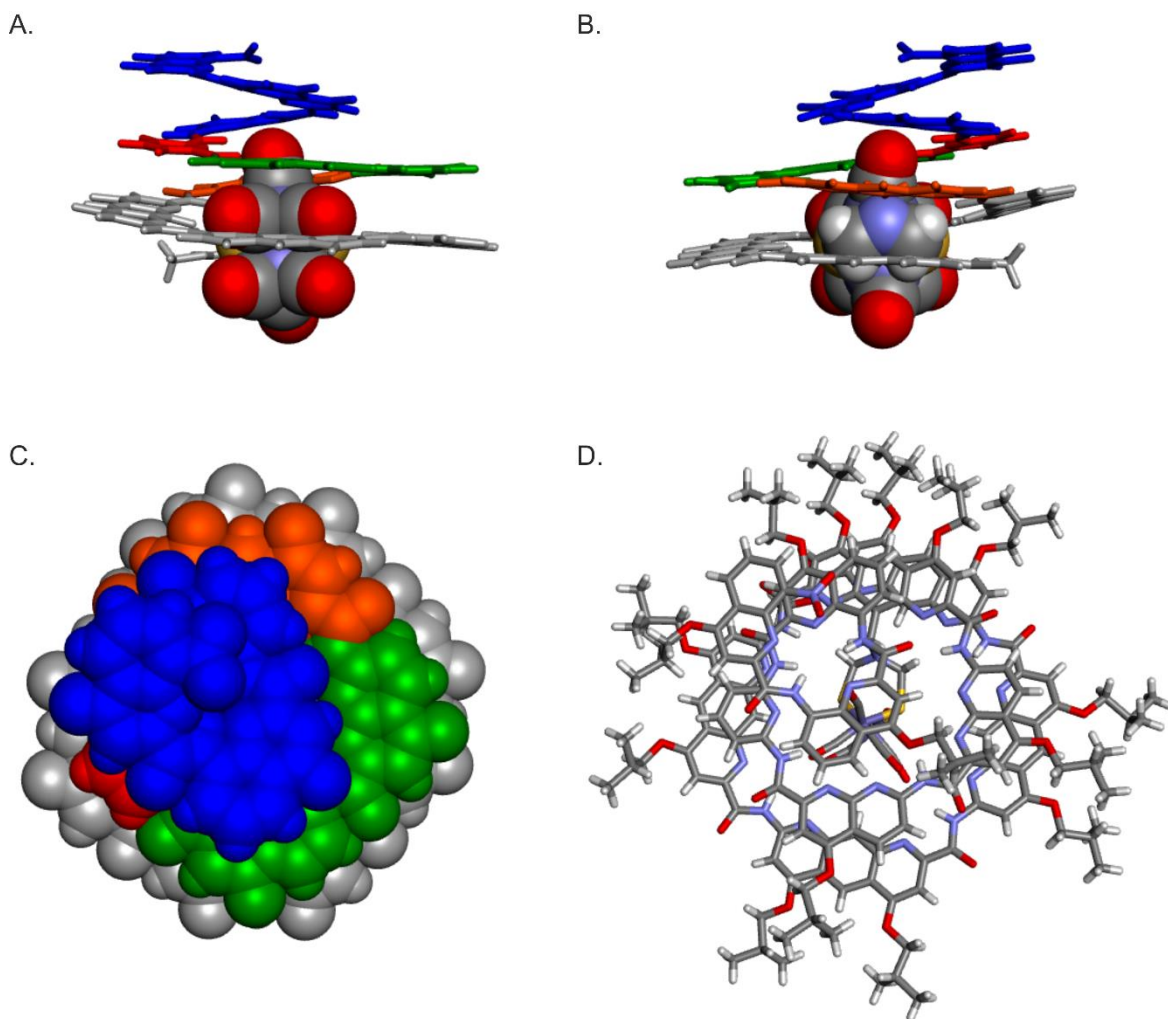

*Figure S14.* Crystal structure views of oligomer **5**. (A) front view and (B) back view where the aromatic backbone is shown in color coded tube representation whereas the metal complex is shown in CPK representation. (C) view from above in CPK representation. Monomers are color coded as in manuscript and isobutoxy side chains are omitted for clarity. (D) view from above in tube representation where isobutoxy side chains are shown and atoms are color coded in grey for carbon, red for oxygen, blue for nitrogen, white for hydrogen, yellow for sulfur and purple for iron.

#### 4.5 X-Ray crystallographic data for compound 9

**Table S6.** Crystal data and refinement details for compound 9.

|                                                  |                                               |
|--------------------------------------------------|-----------------------------------------------|
| <i>Identification code</i>                       | <b>9</b>                                      |
| <i>Chemical formula</i>                          | C33 H33 Fe2 N3 O12 S2                         |
| <i>Formula weight</i>                            | 839.44                                        |
| <i>Temperature (K)</i>                           | 100                                           |
| <i>Wavelength (Å)</i>                            | 0.8000                                        |
| <i>Crystal system</i>                            | Triclinic                                     |
| <i>Space group</i>                               | P-1                                           |
| <i>Unit cell dimensions (a,b,c,α,β,γ) (Å, °)</i> | 11.614, 11.913, 14.995, 90.34, 100.67, 114.20 |
| <i>Volume (Å<sup>3</sup>)</i>                    | 1851.9                                        |
| <i>Z</i>                                         | 2                                             |
| <i>Density (calculated)</i>                      | 1.505                                         |
| <i>Absorption coefficient</i>                    | 1.329                                         |
| <i>Absorption correction</i>                     | none                                          |
| <i>Crystal size (mm)</i>                         | 0.10, 0.050, 0.02                             |
| <i>Index ranges</i>                              | -12 < h < 12, -12 < k < 12, -15 < l < 15      |
| <i>Completeness to theta = 24.895°</i>           | 0.882                                         |
| <i>Reflections collected</i>                     | 3993                                          |
| <i>Reflections observed [I &gt; 2σ(I)]</i>       | 3617                                          |
| <i>R<sub>int</sub></i>                           | 0.0595                                        |
| <i>Data/parameters/restraints</i>                | 3993/507/465                                  |
| <i>Goodness-of-fit on F<sup>2</sup></i>          | 1.039                                         |
| <i>Final R indices [I &gt; 2σ(I)]</i>            | 0.0576                                        |
| <i>R indices (all data)</i>                      | 0.0618                                        |
| <i>Largest diff. peak and hole</i>               | 0.83/-0.72                                    |
| <i>CCDC #</i>                                    | 2031550                                       |

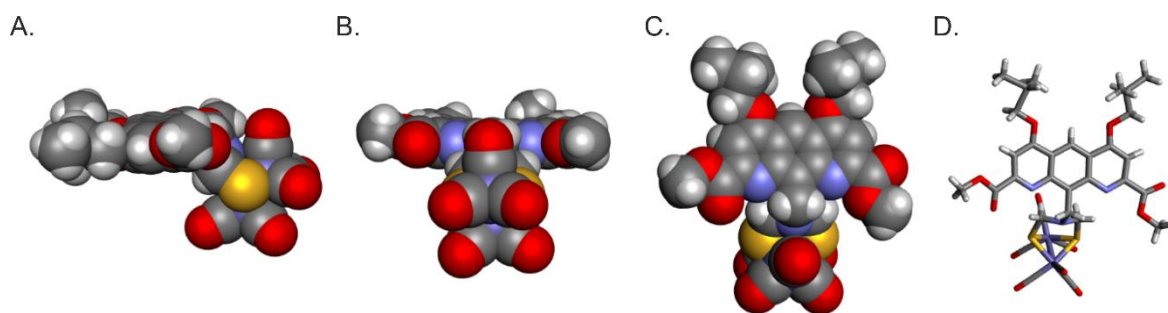

**Figure S15.** Crystal structure views of A<sup>Fe</sup> monomer 9: (A) side view in CPK representations, (B) front view in CPK representations, view from above (C) in CPK representations and (D) in tube representation.

## 5. References

- (1) Kabsch, W. *Acta Cryst.* 2010, D66, 125-132.
- (2) Sheldrick, G. M. *Acta Cryst.* 2008, A64, 112-122.
- (3) Emsley, P., Lohkamp, B., Scott, W. G., and Cowtan, K. *Acta Cryst.* 2010, D66, 486-501.
- (4) Schüttelkopf, A. W. and van Aalten, D. M. F., *Acta Crystallogr* 2004, D60, 1355–1363.
- (5) Spek, A. L. *Acta Cryst.* 2015, C71, 9–18.
- (6) Spek, A. L. *J. Appl. Cryst.* 2003, 36, 7-13.
- (7) Ferrand, Y.; Kendhale, A. M.; Kauffmann, B.; Grélard, A.; Marie, C.; Blot, V.; Pipelier, M.; Dubreuil, D.; Huc, I. *J. Am. Chem. Soc.* 2010, 132, 7858–7859.
- (8) Singleton, M. L.; Castellucci, N.; Massip, S.; Kauffmann, B.; Ferrand, Y.; Huc, I. *J. Org. Chem.* 2014, 79, 2115–2122.
- (9) Seyferth, D., Henderson, R. S. & Song, L. C. Chemistry of  $\mu$ -Dithlo-bis(tricarbonyliron), a Mimic of Inorganic Disulfides. 1. Formation of Di- $\mu$ -thiolato-bis(tricarbonyliron) Dianion. *Organometallics.* 1982, 1, 125–133.

## 6. $^1\text{H}$ NMR and $^{13}\text{C}$ NMR spectra of new synthetic compounds

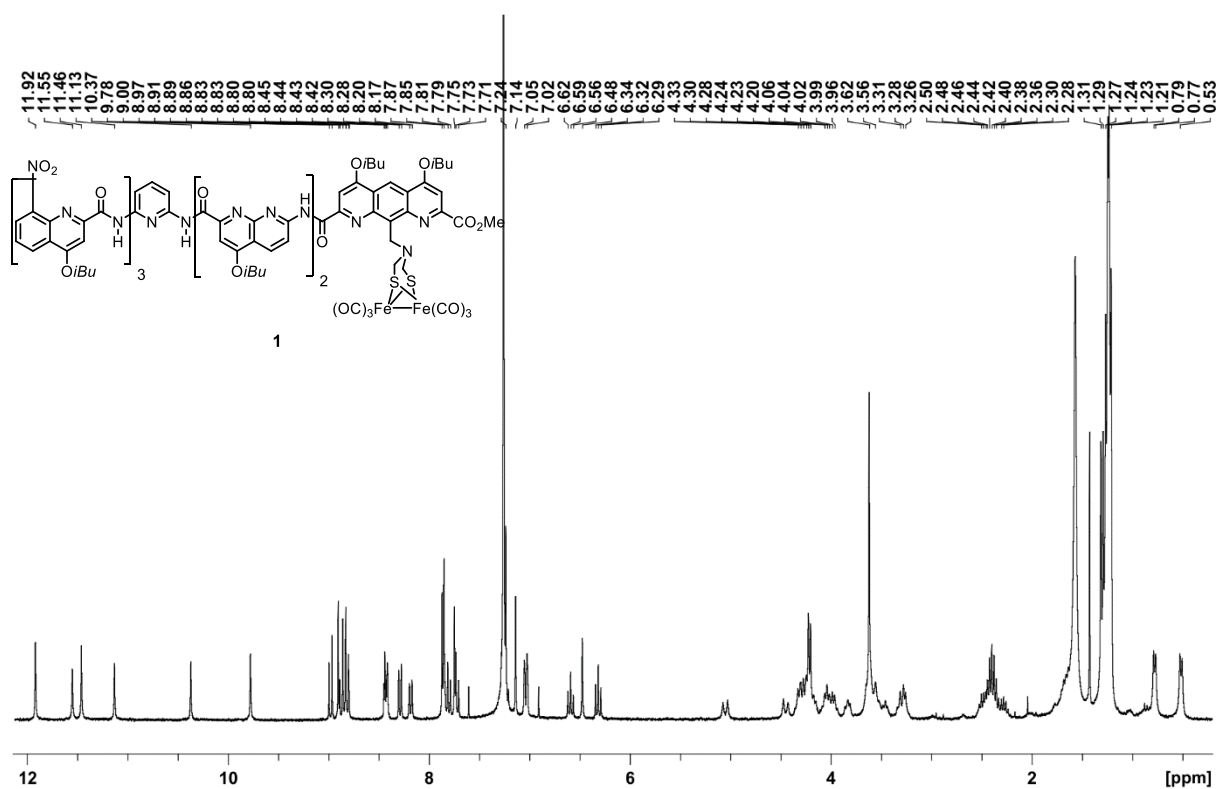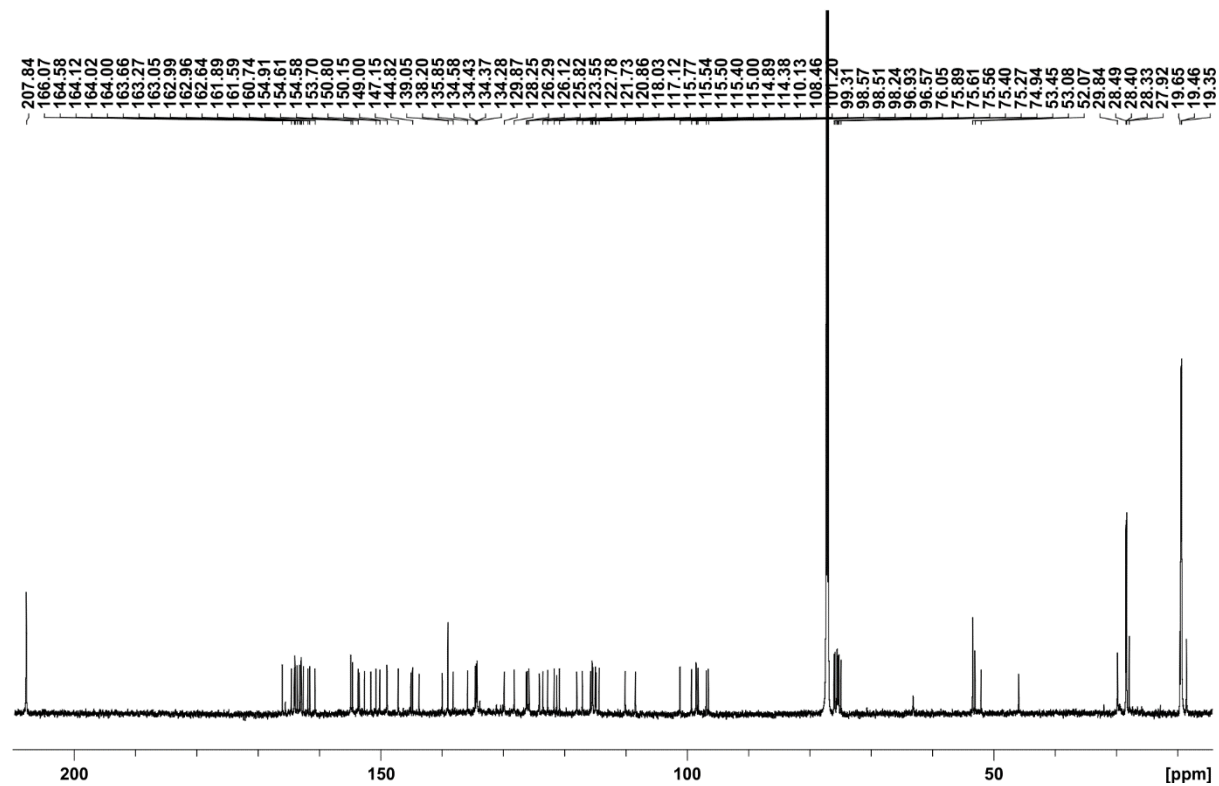

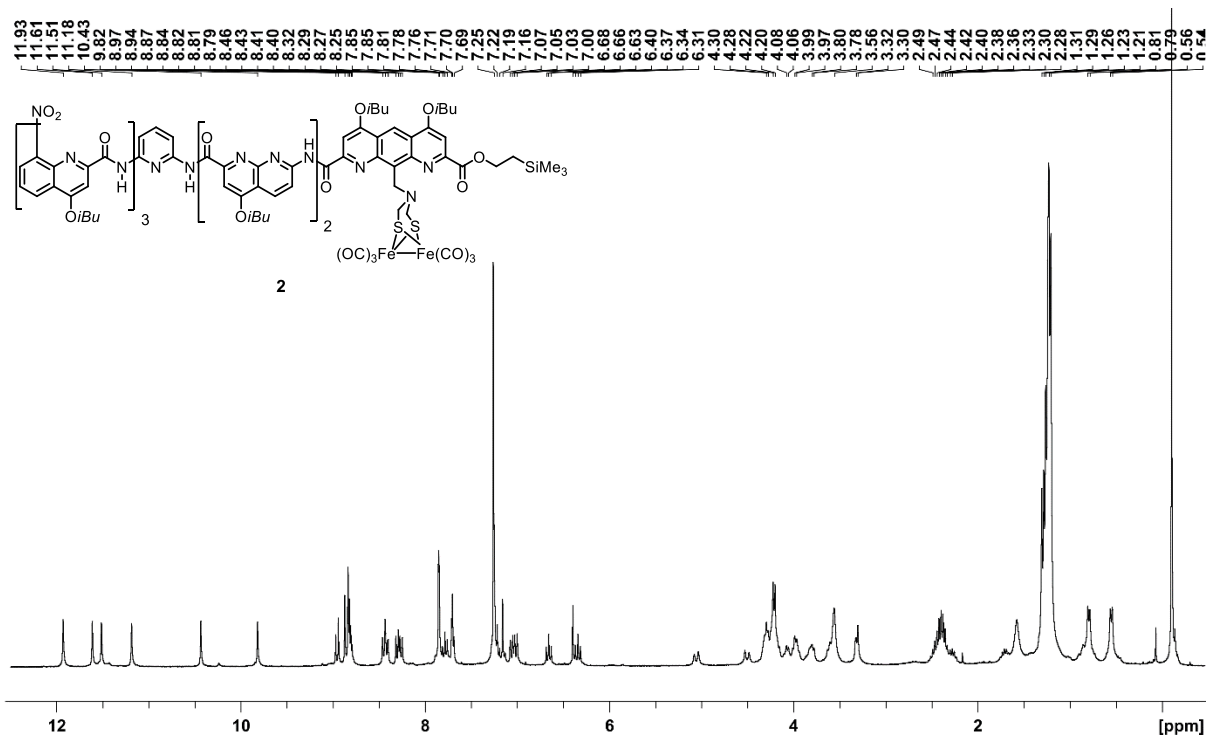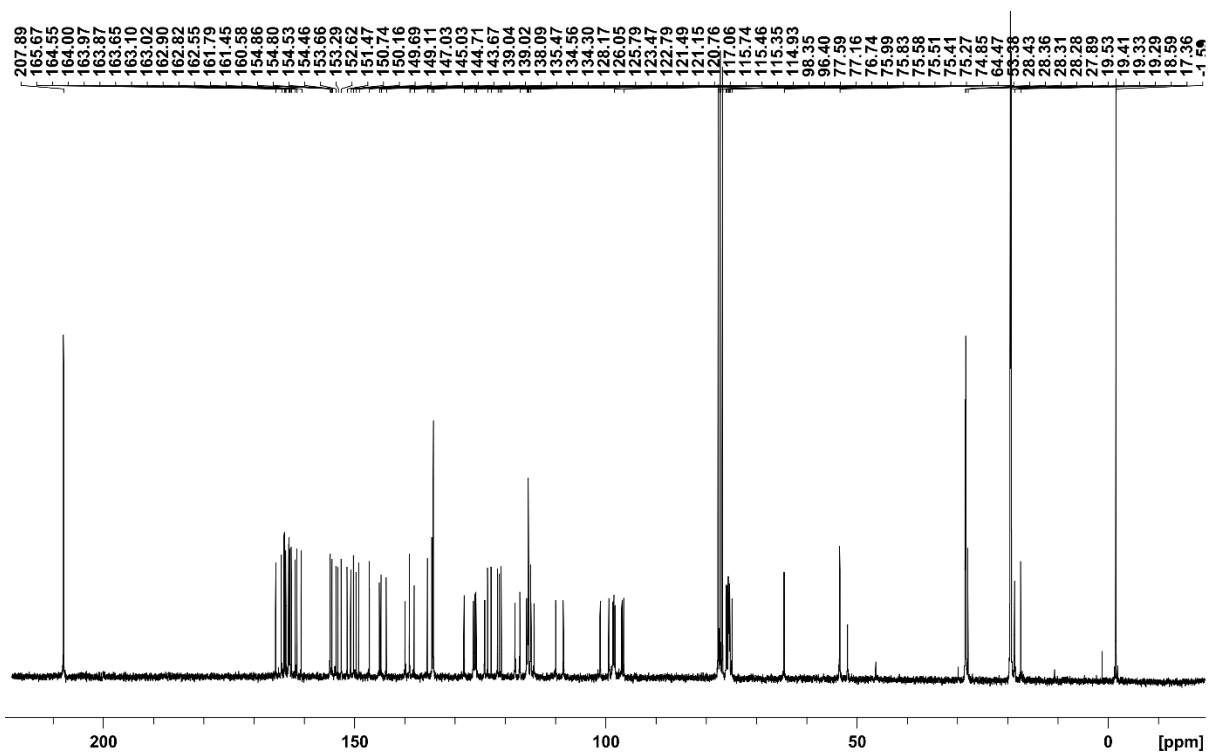

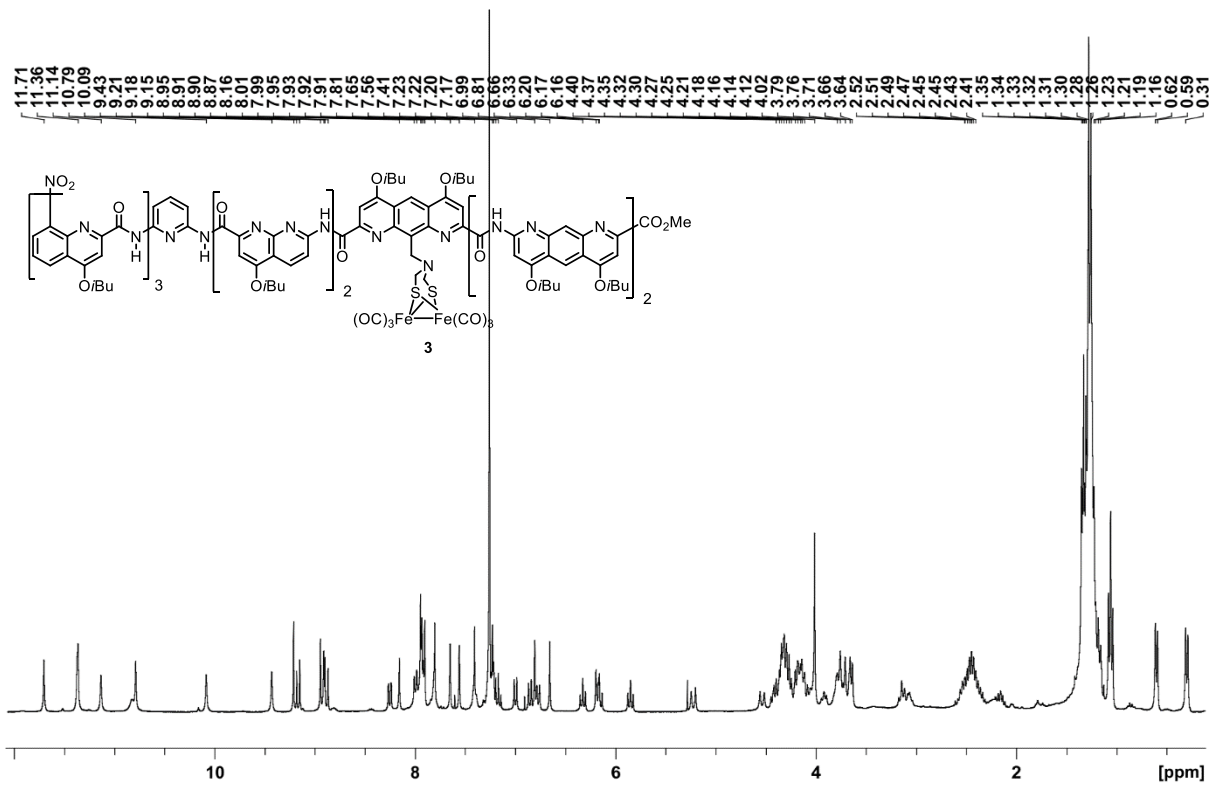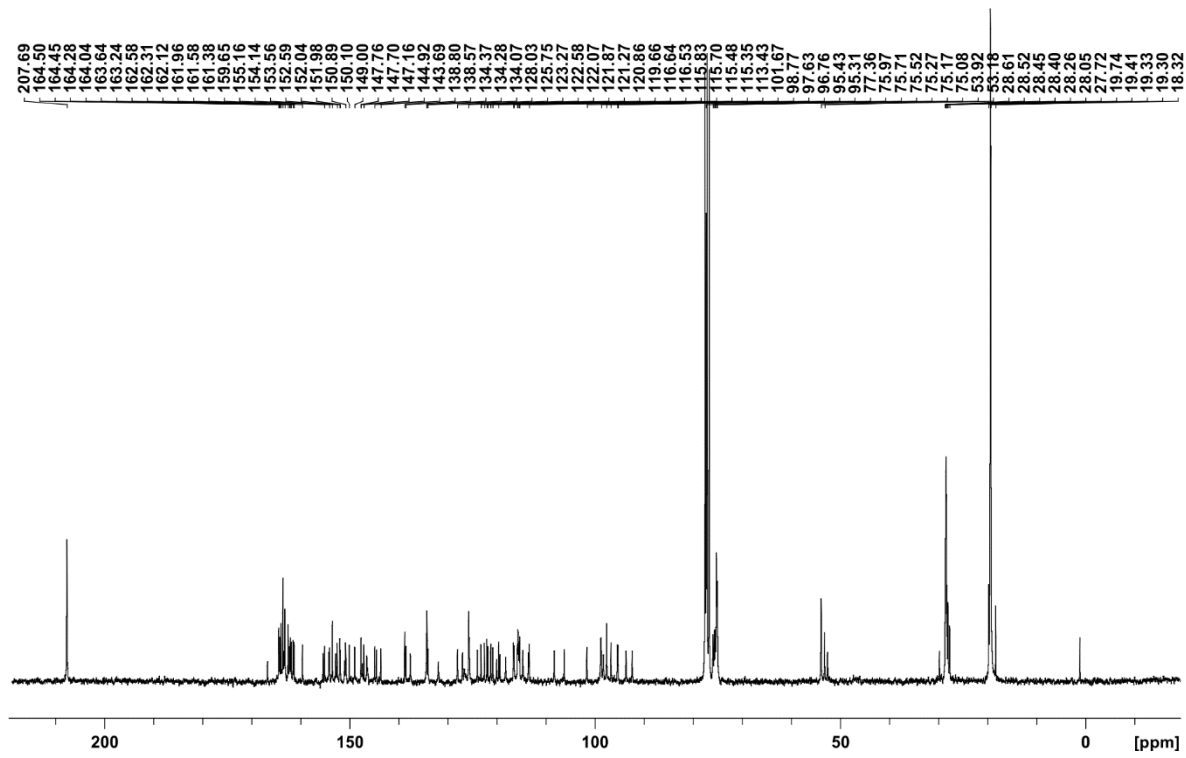



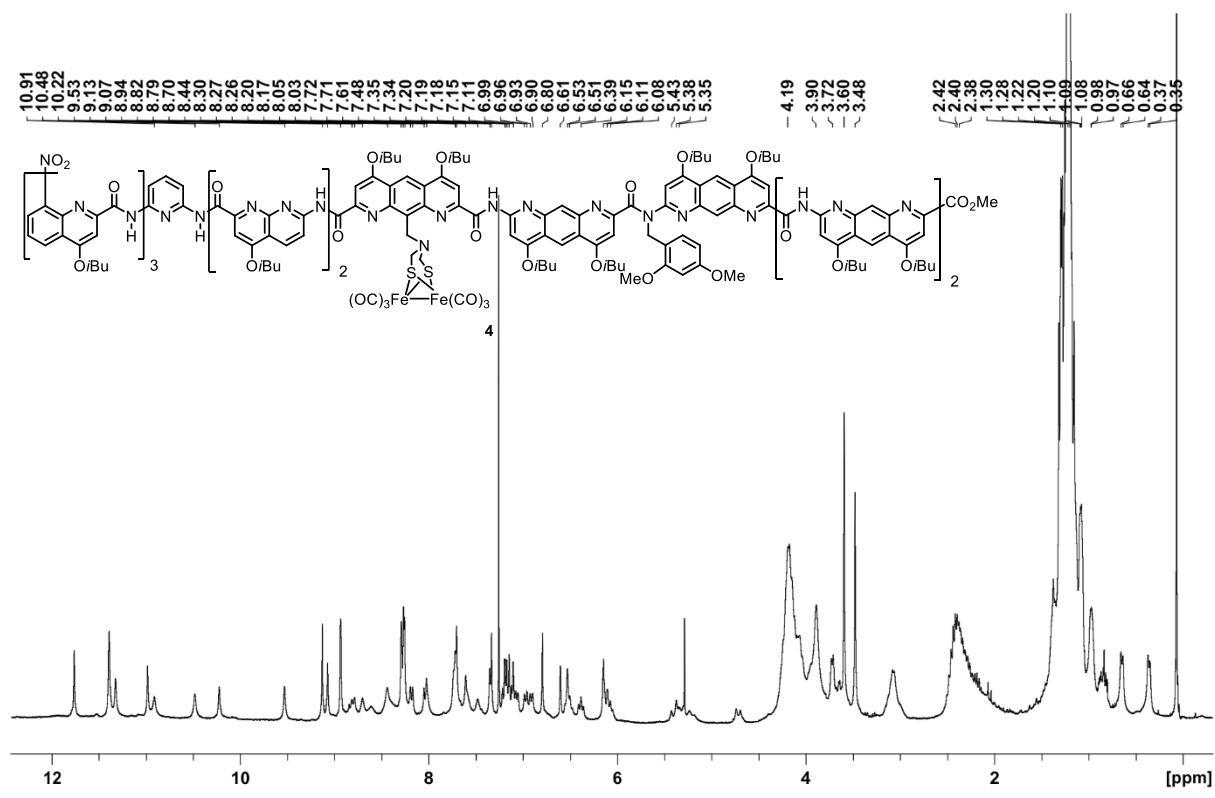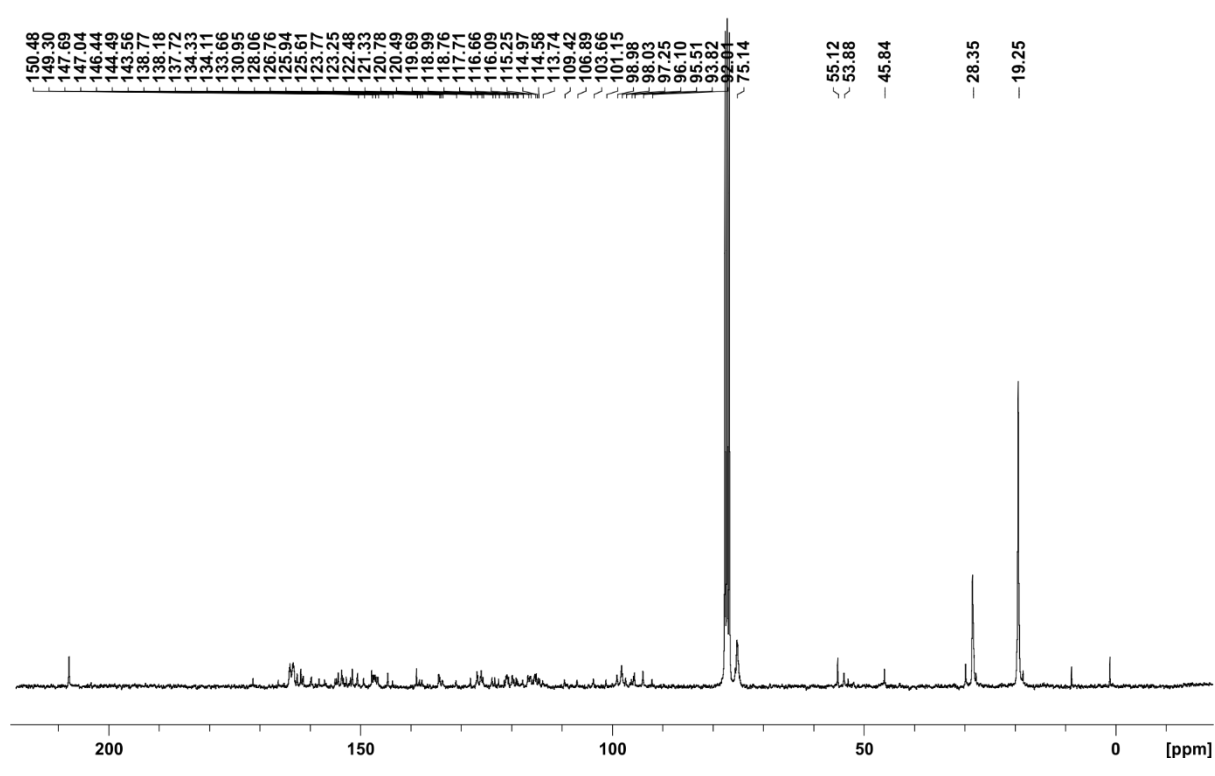

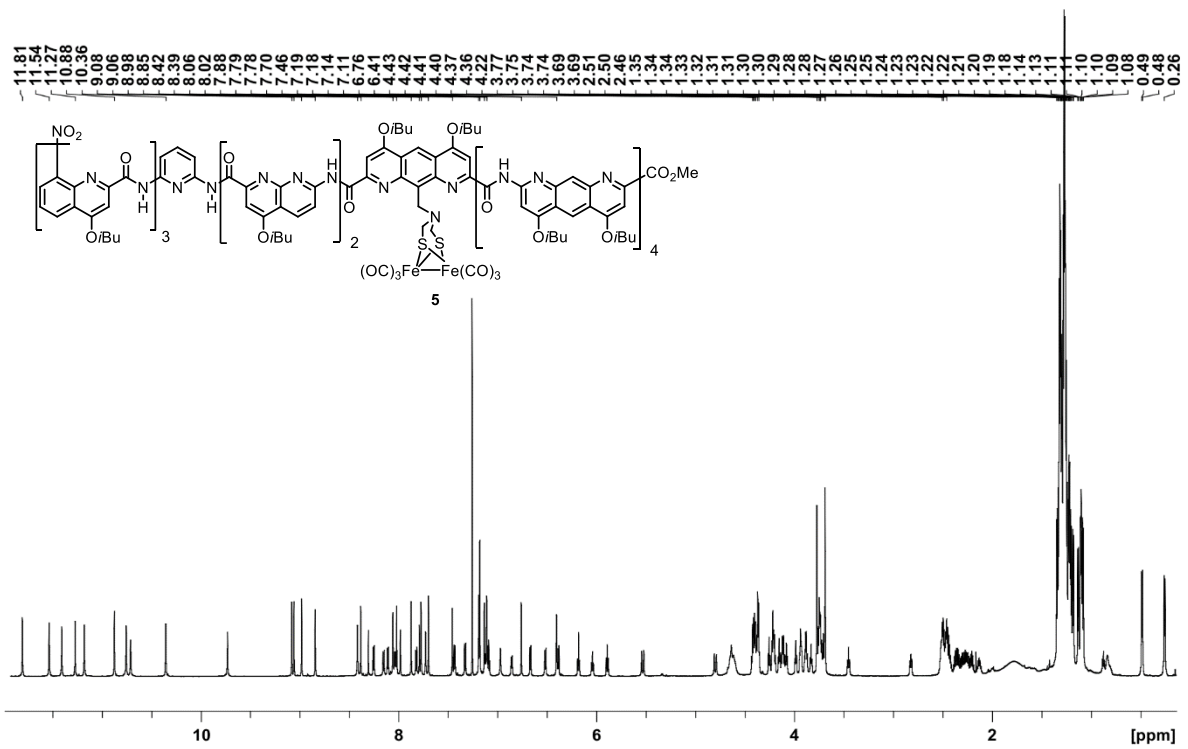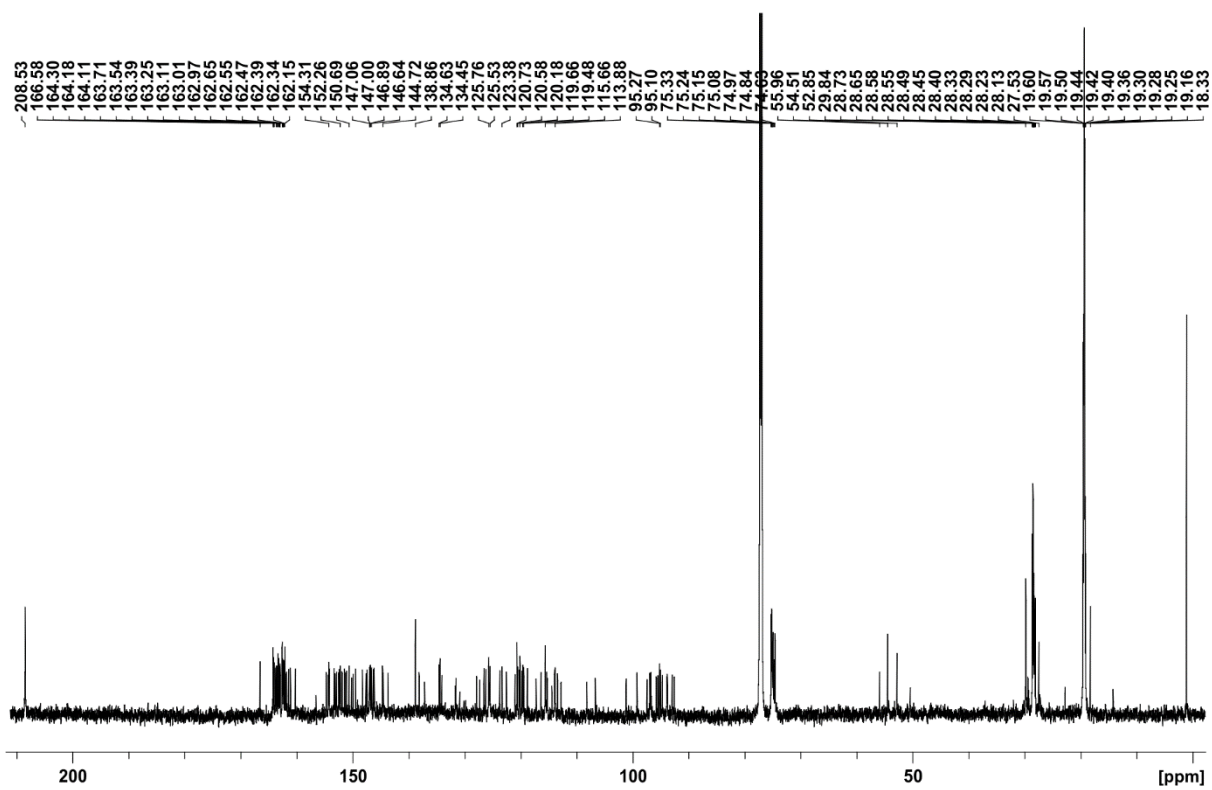

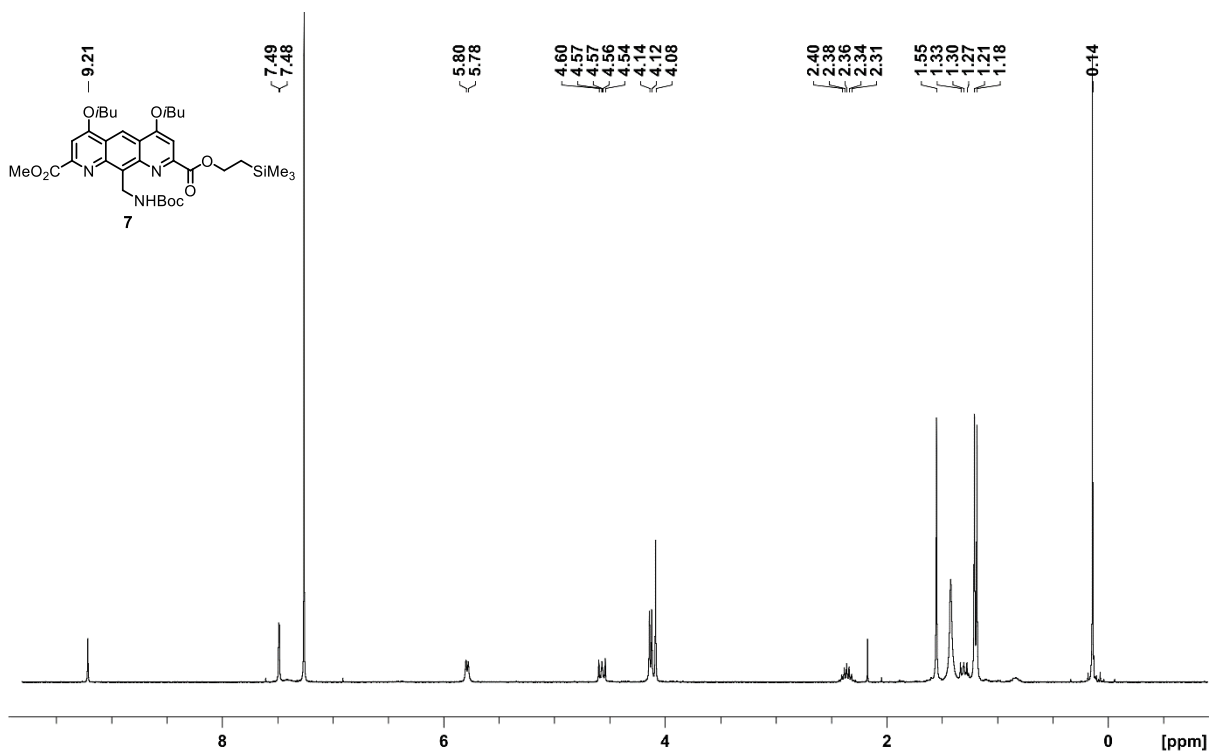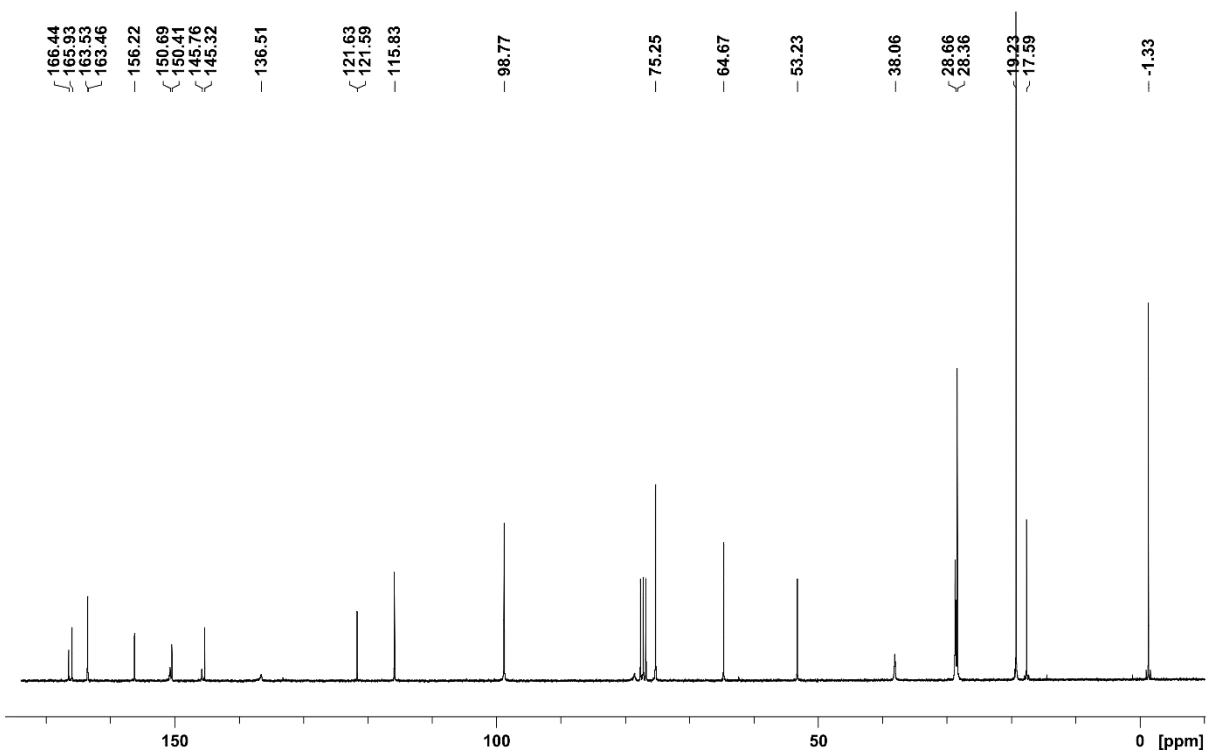

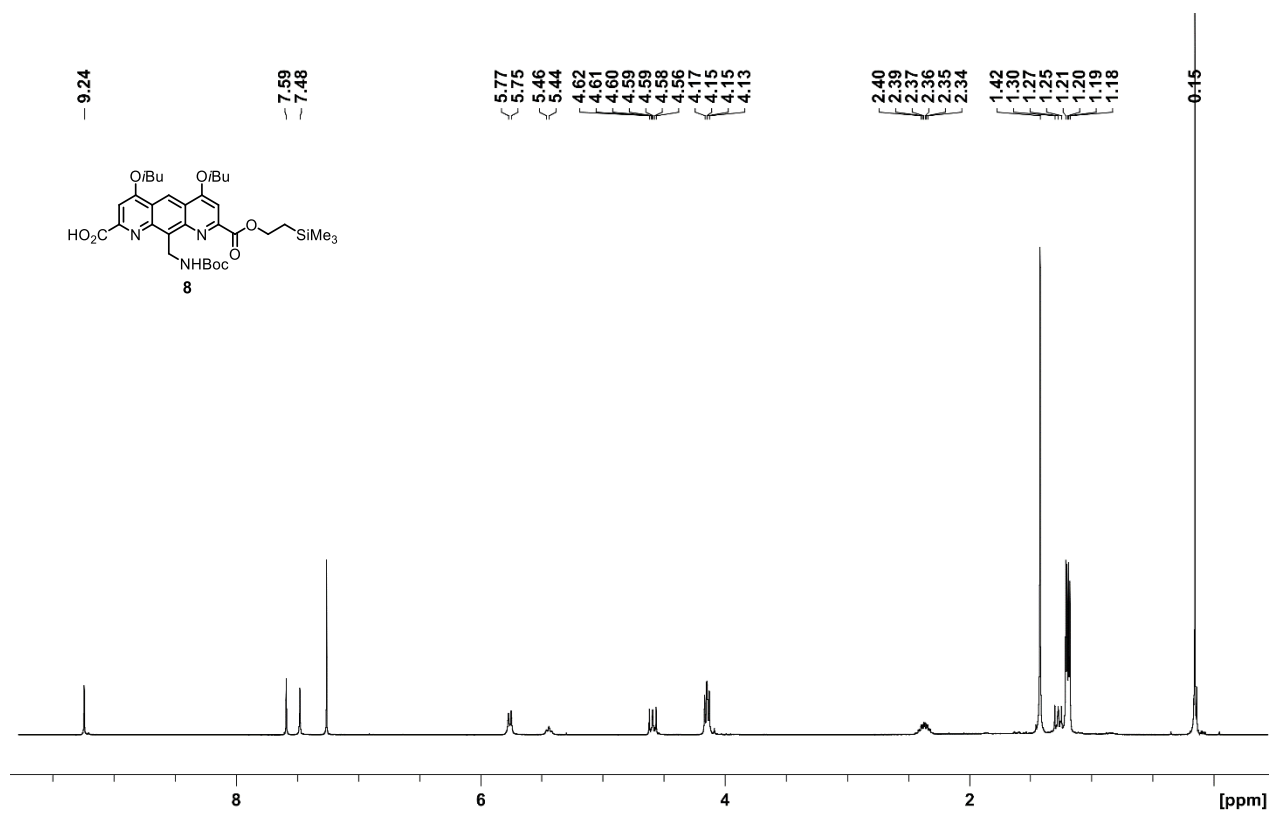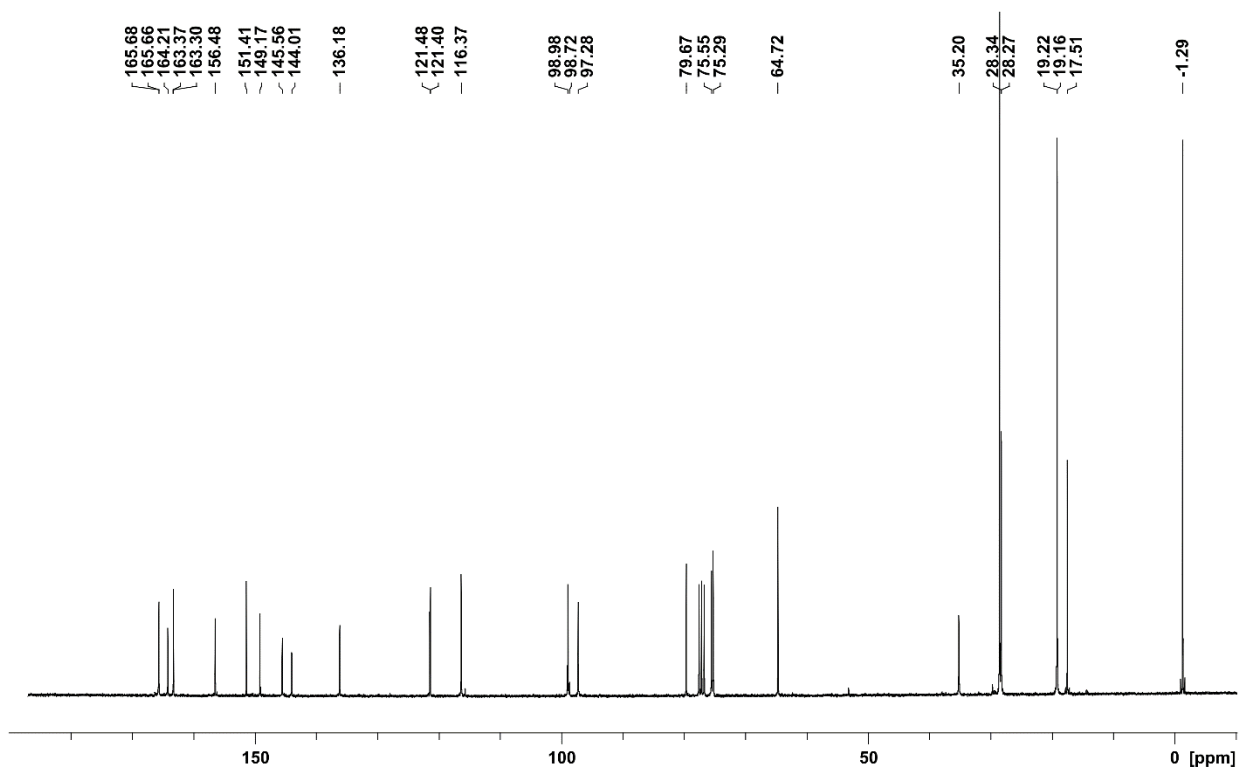

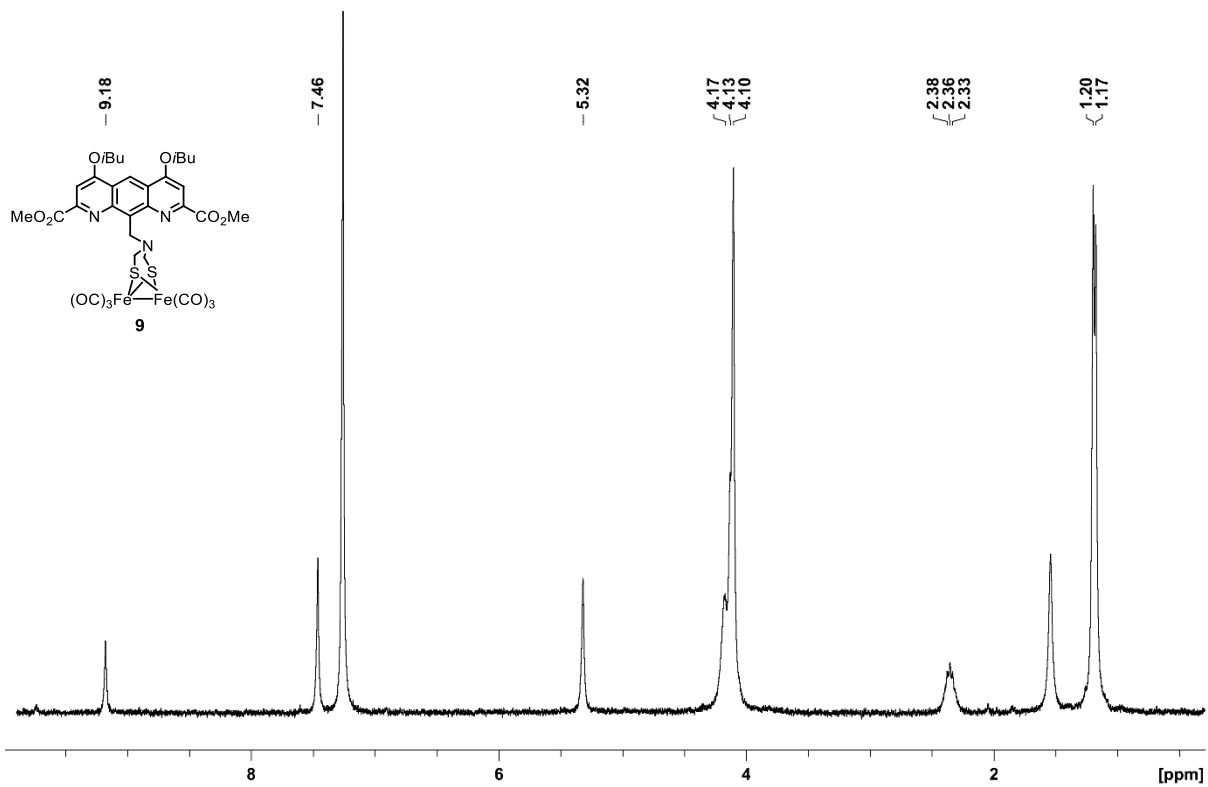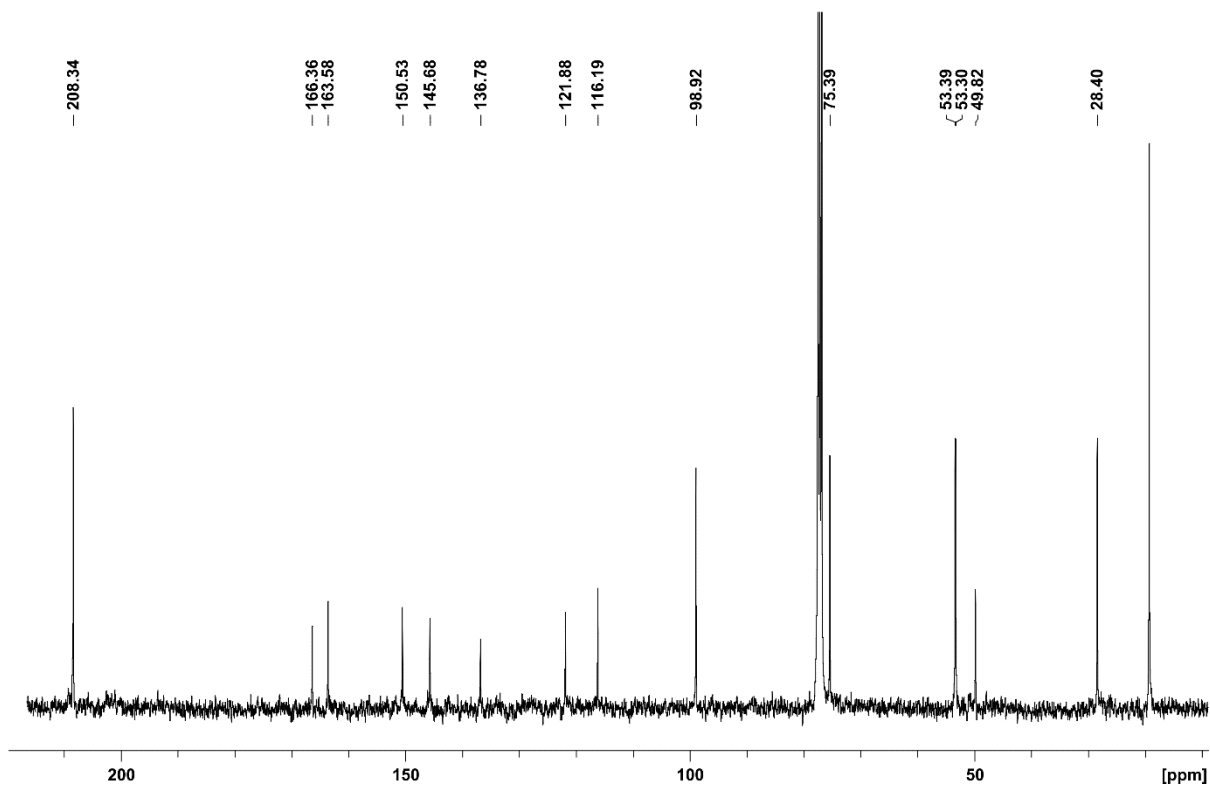

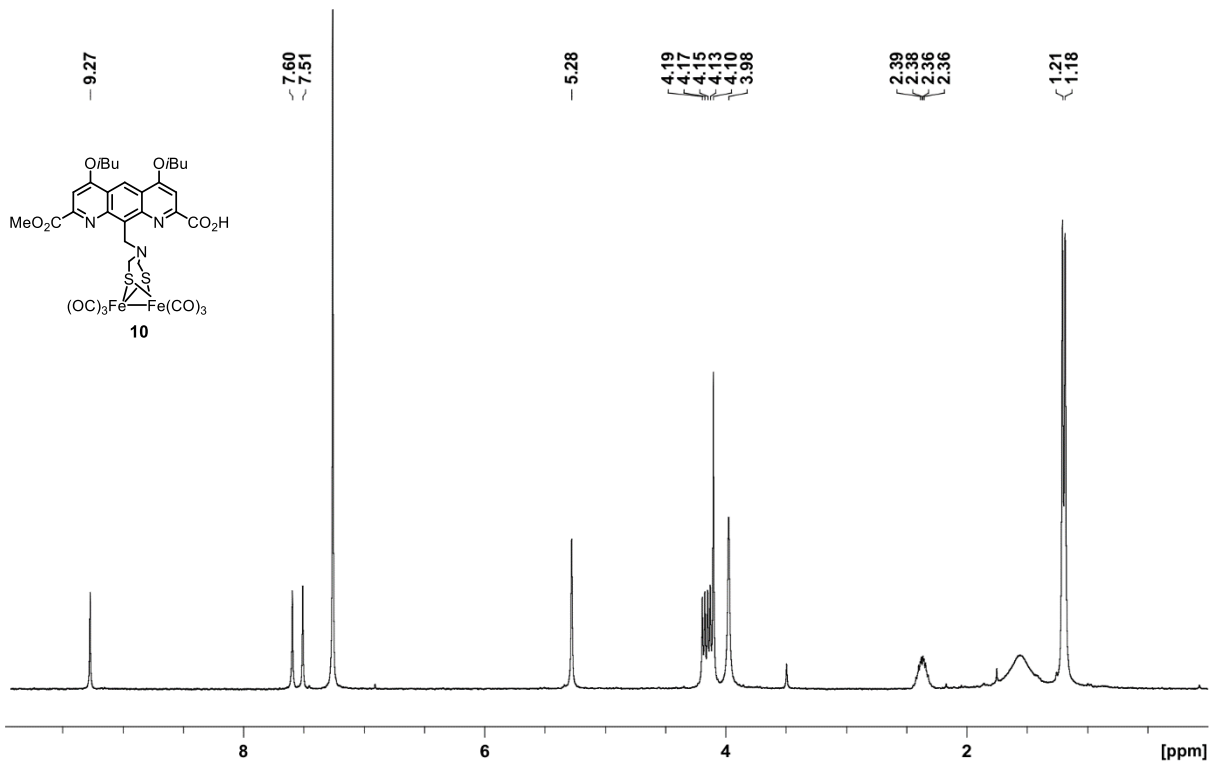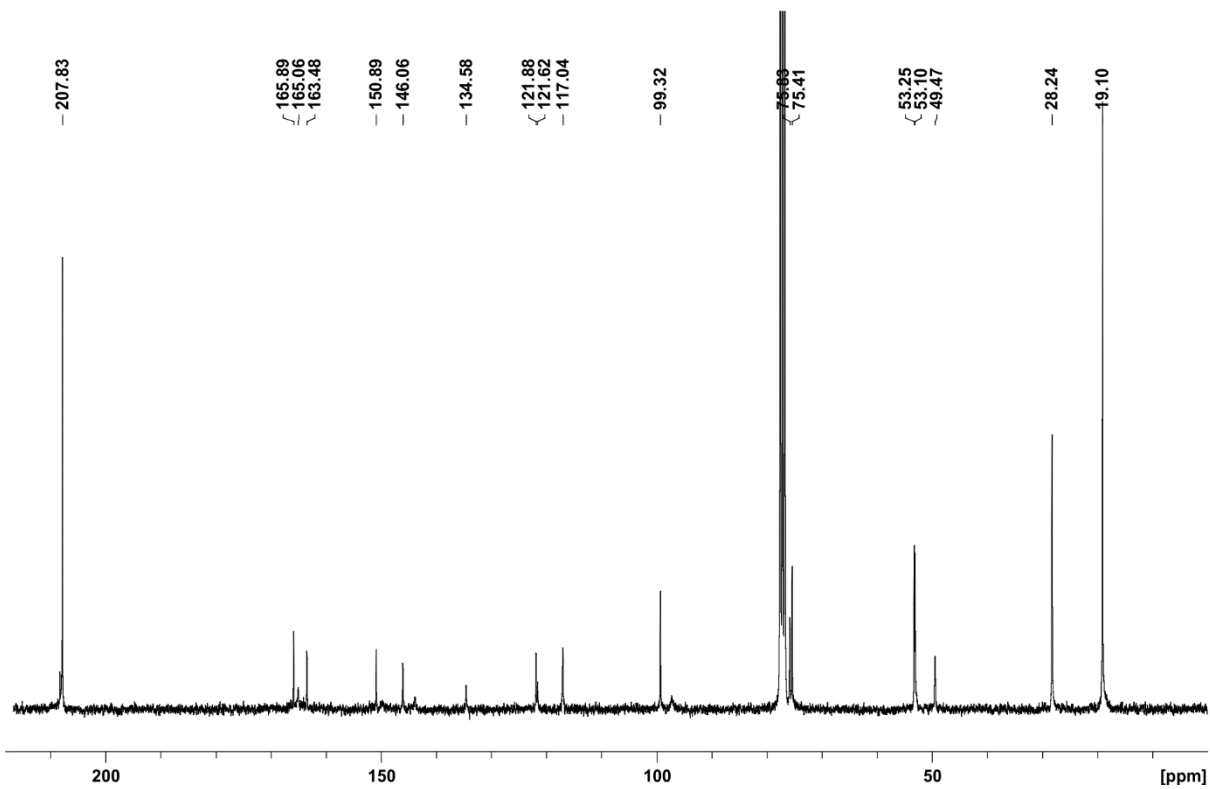

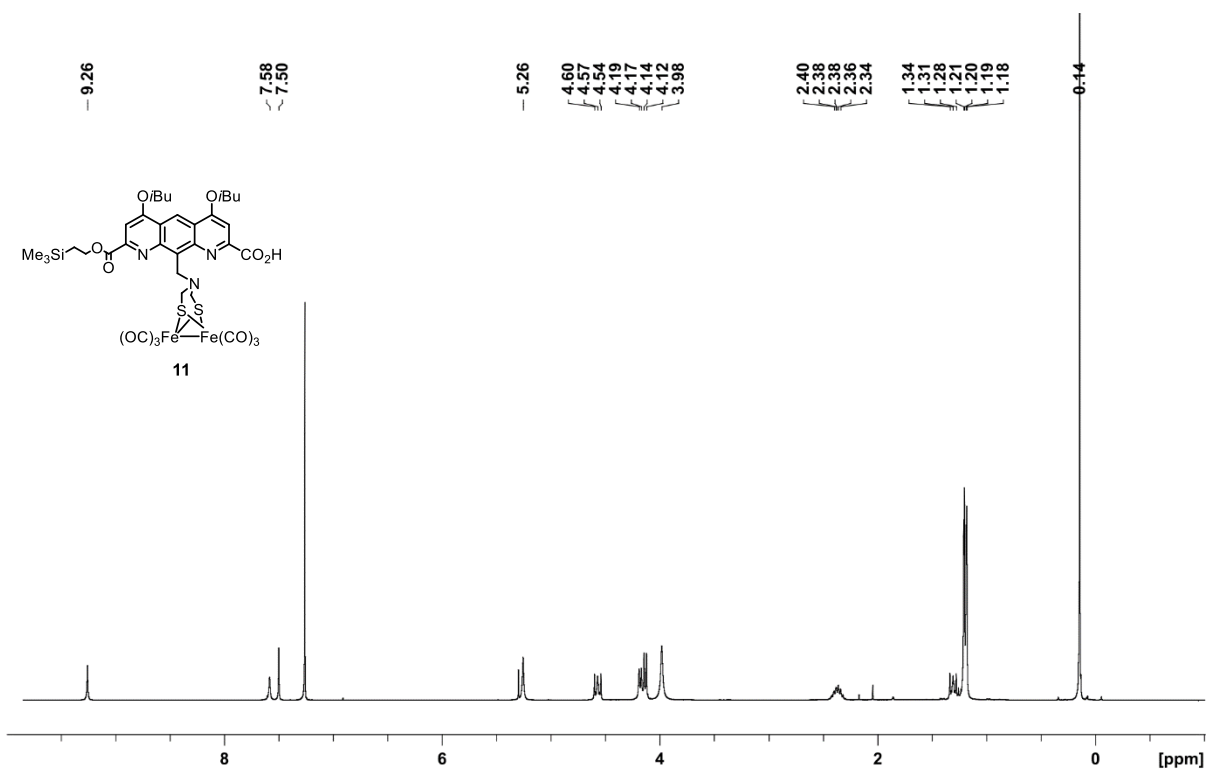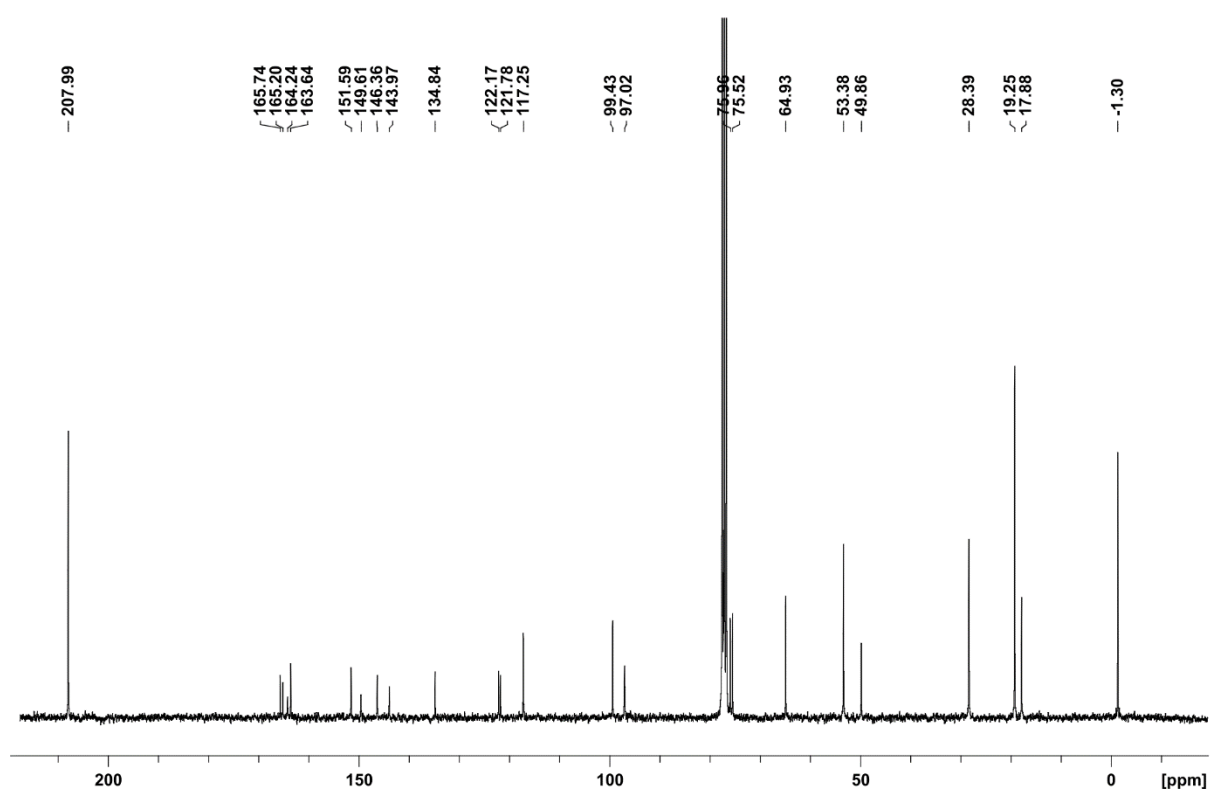

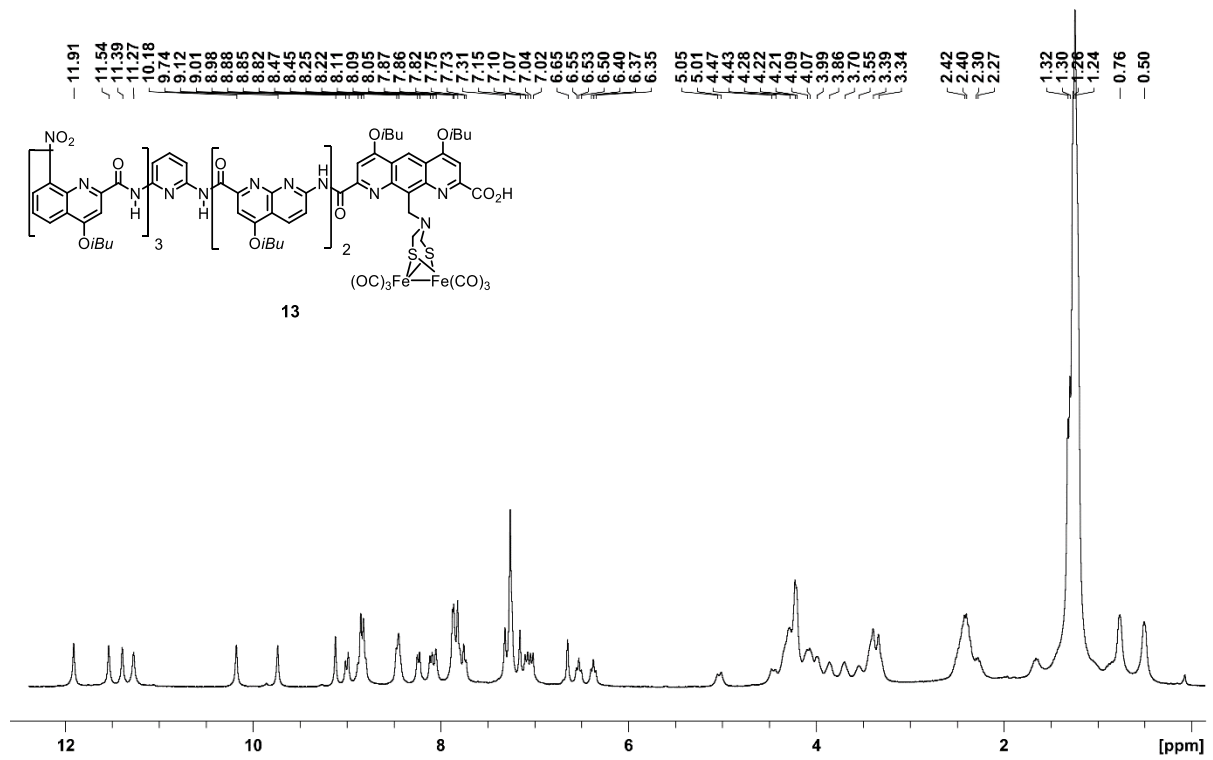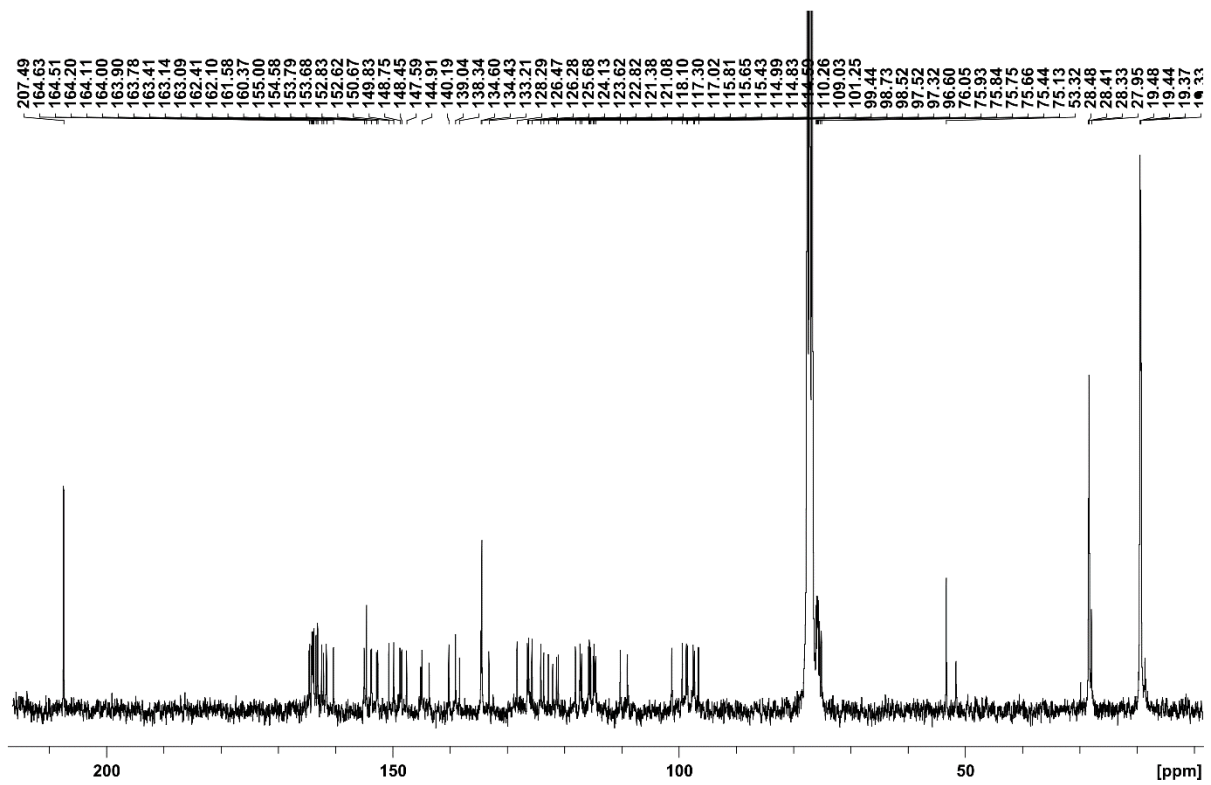



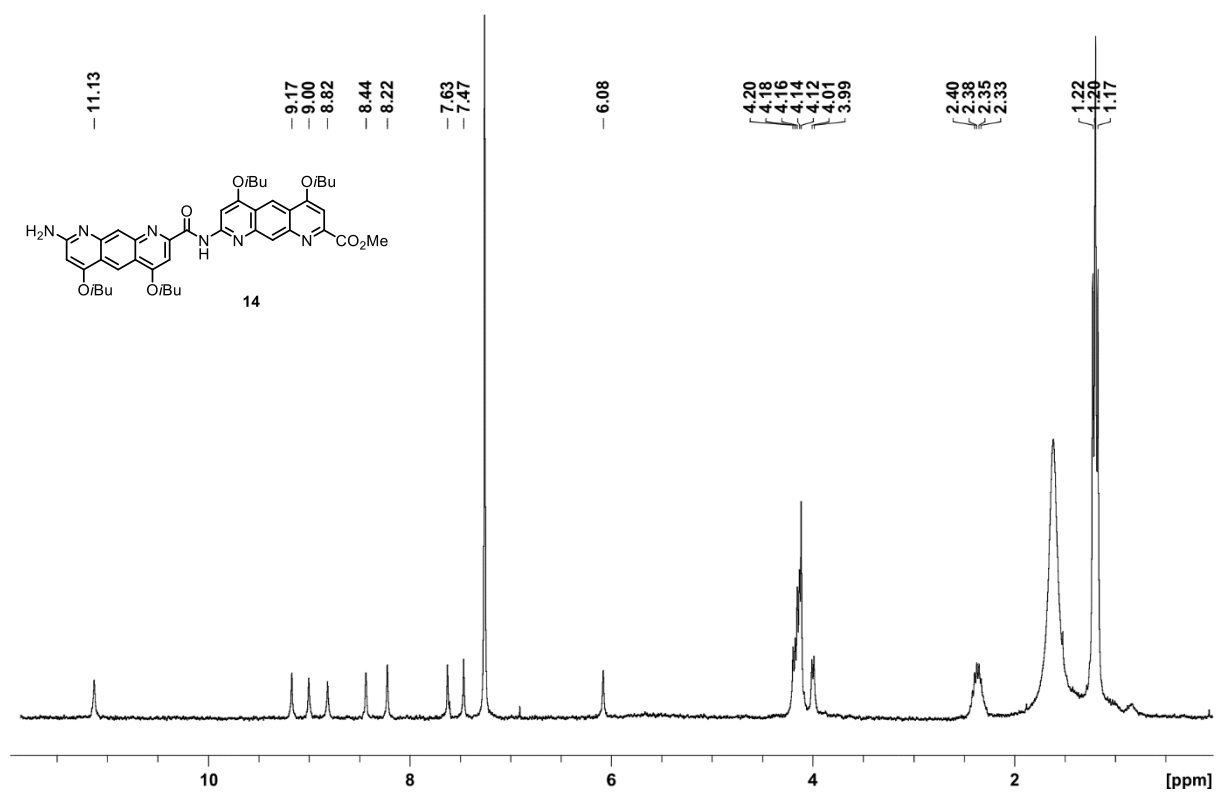

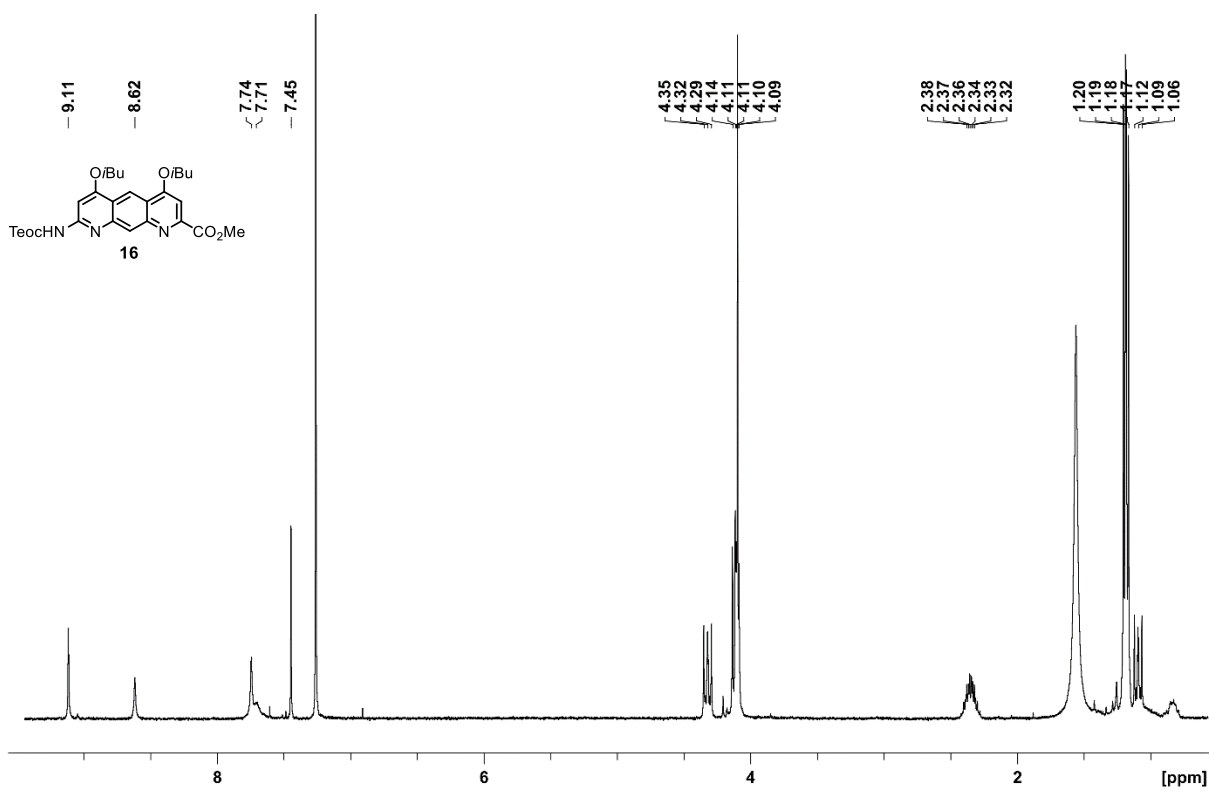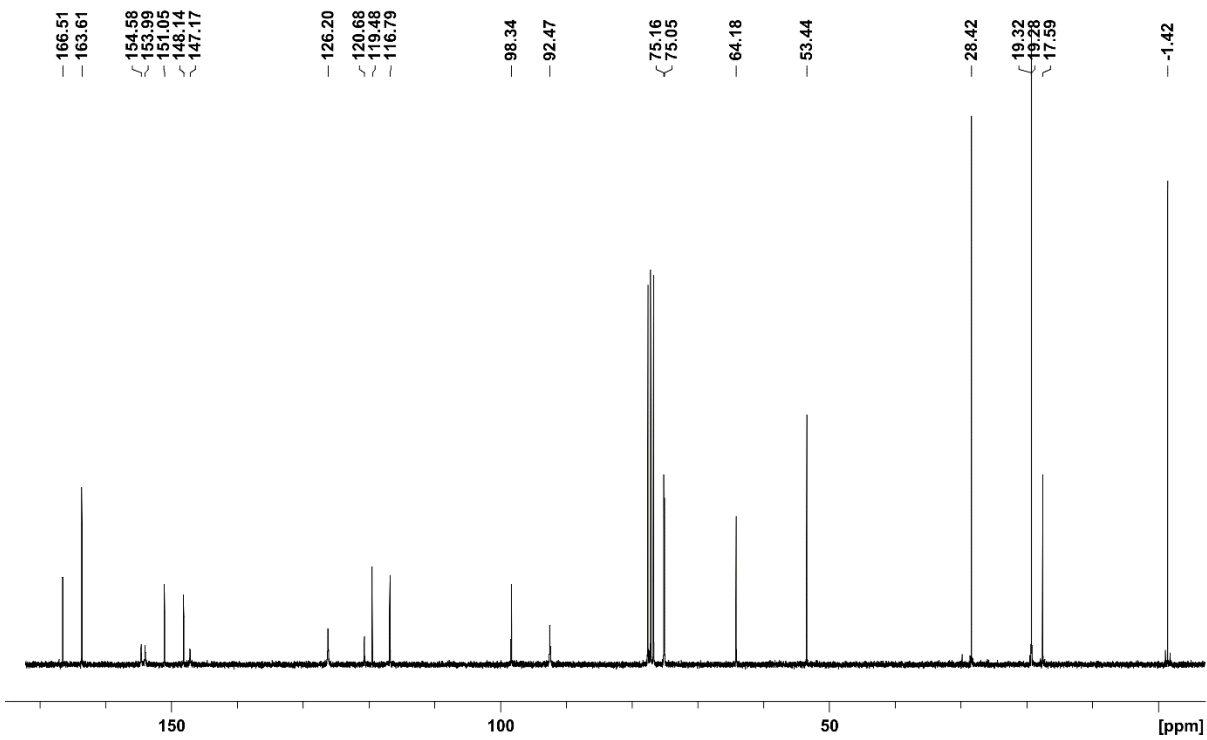

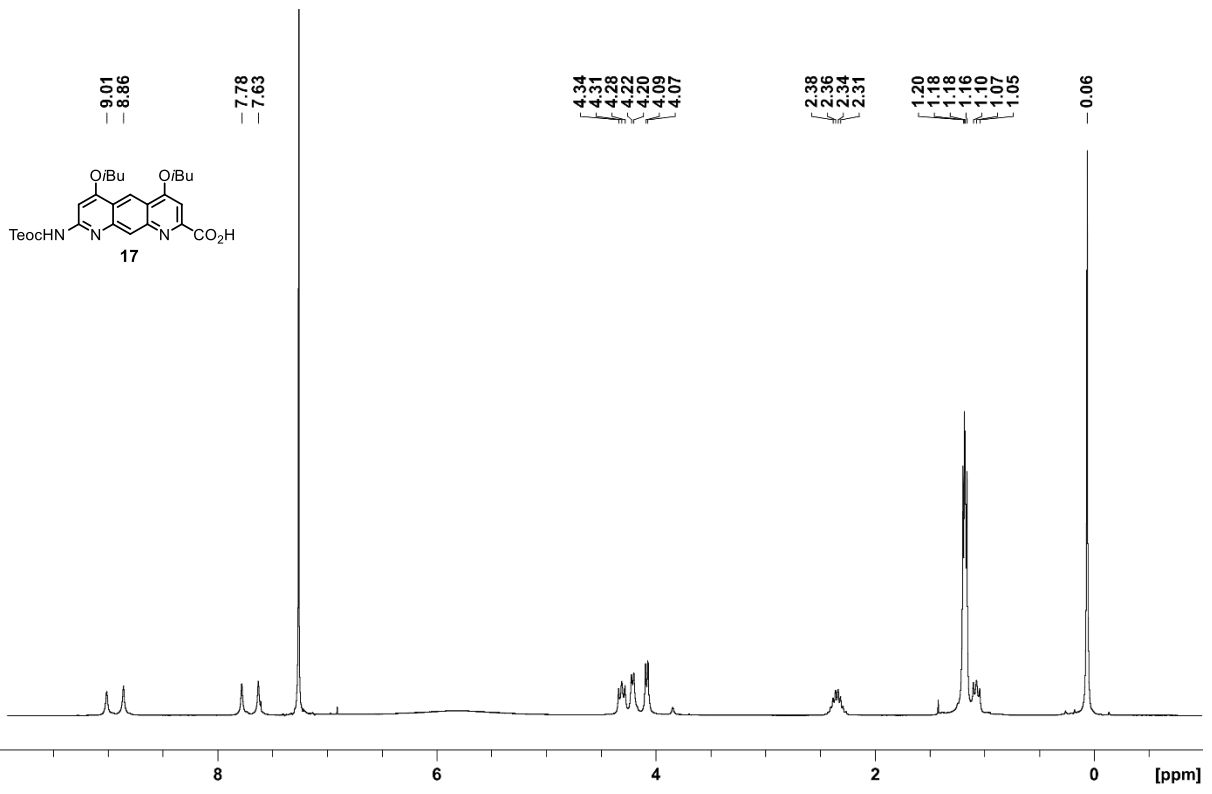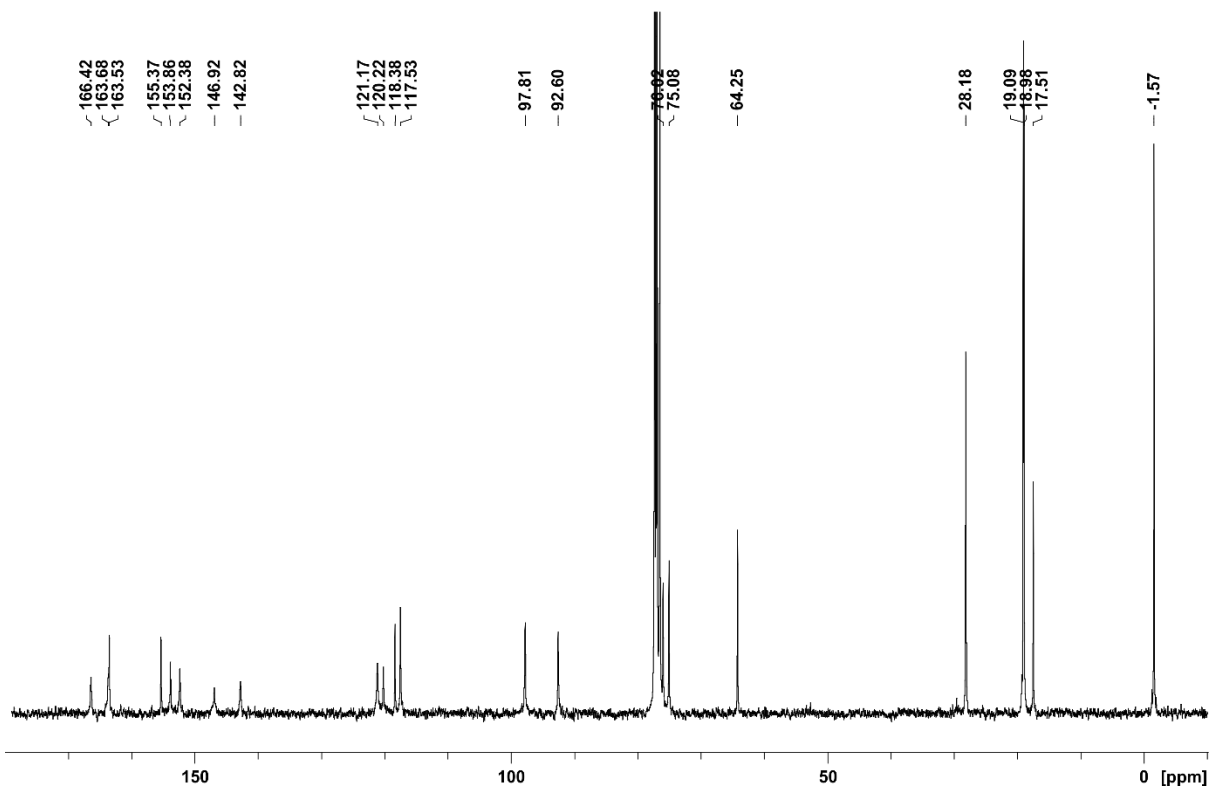

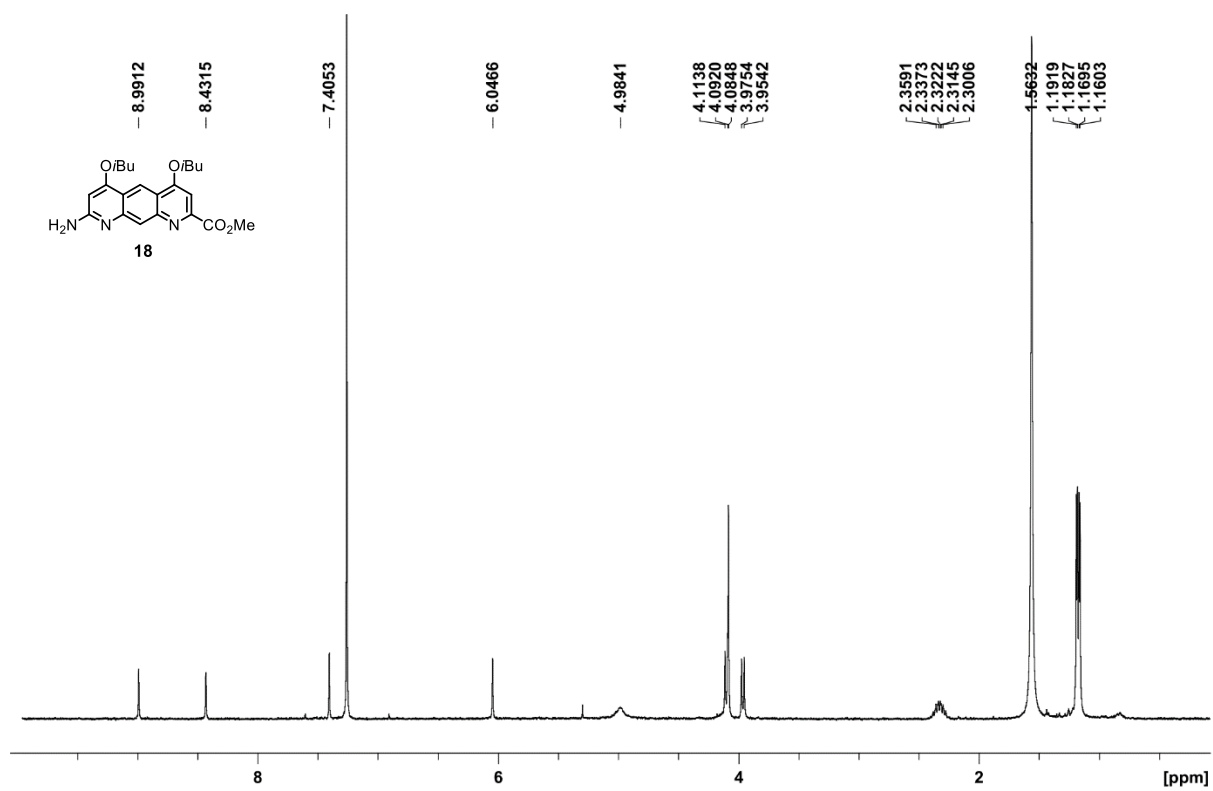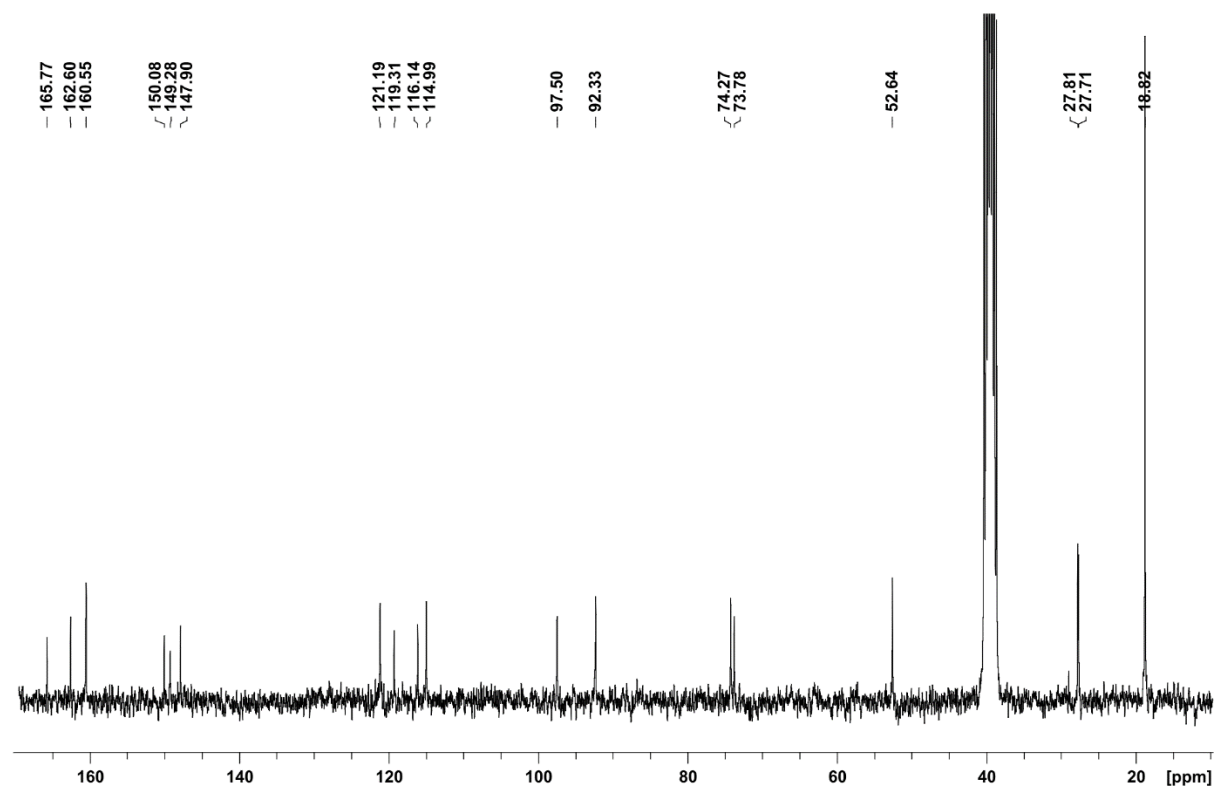

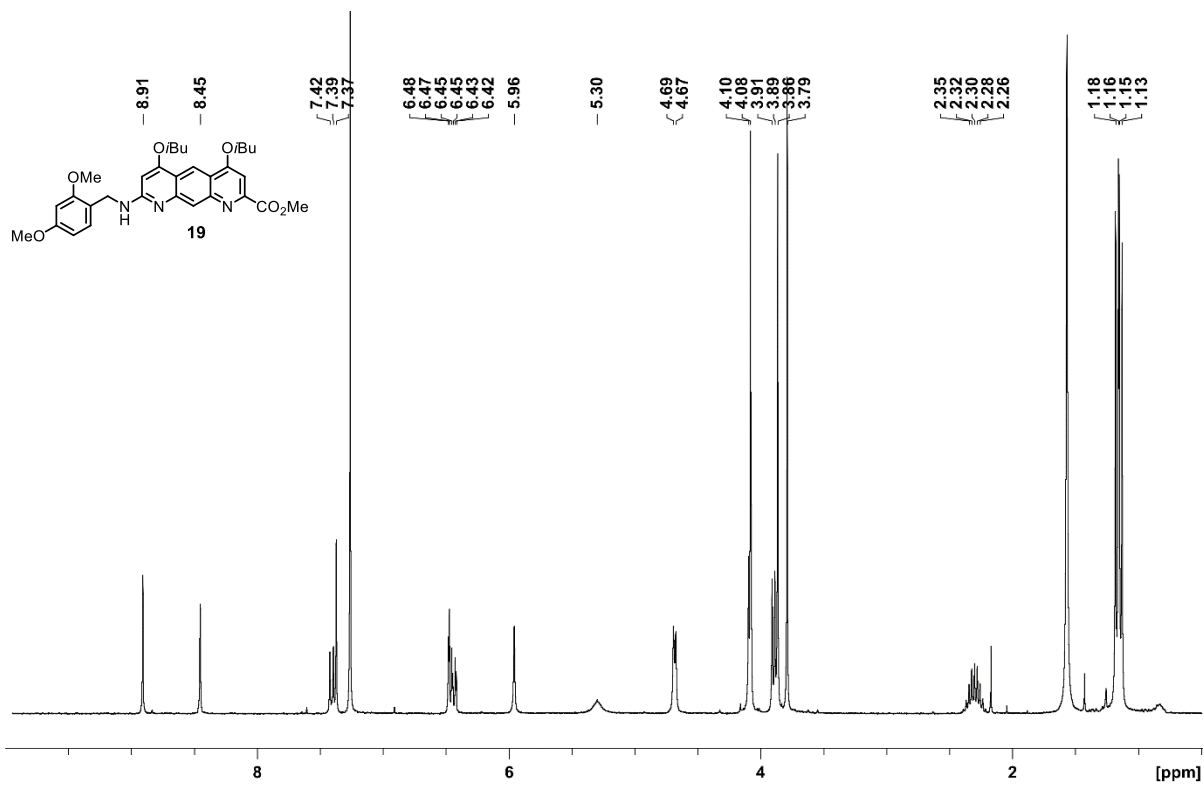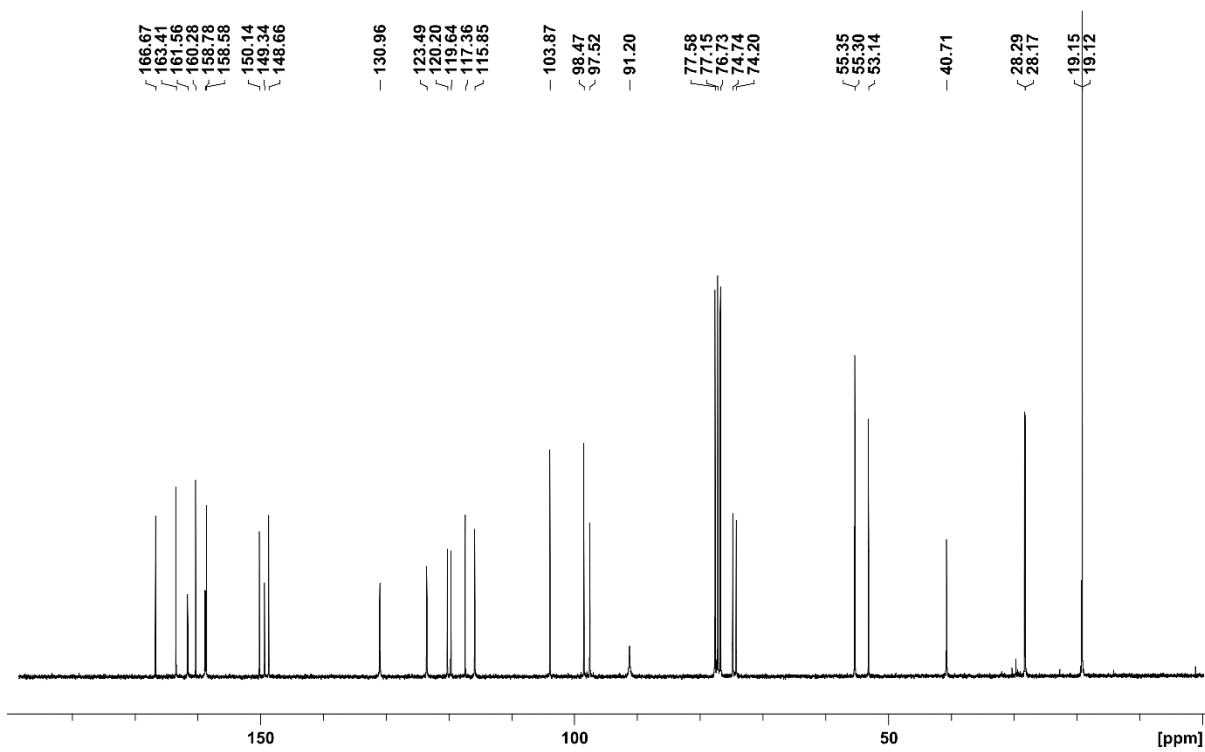

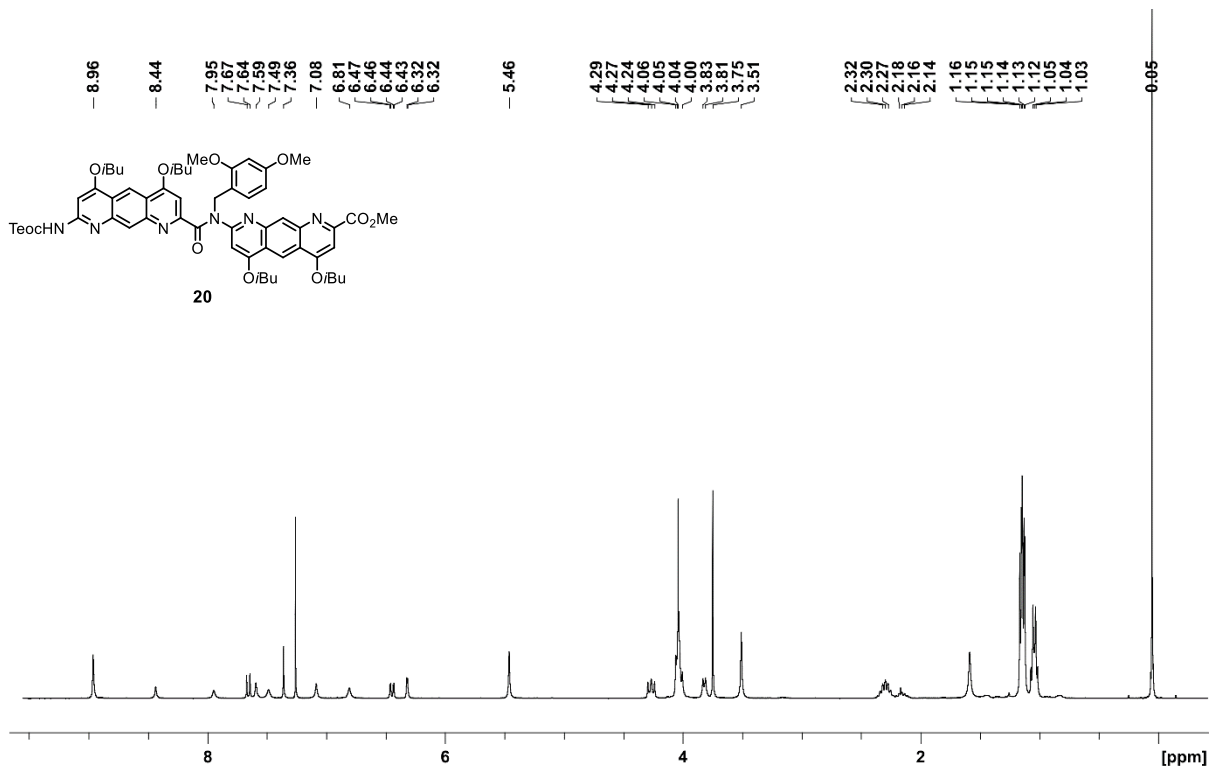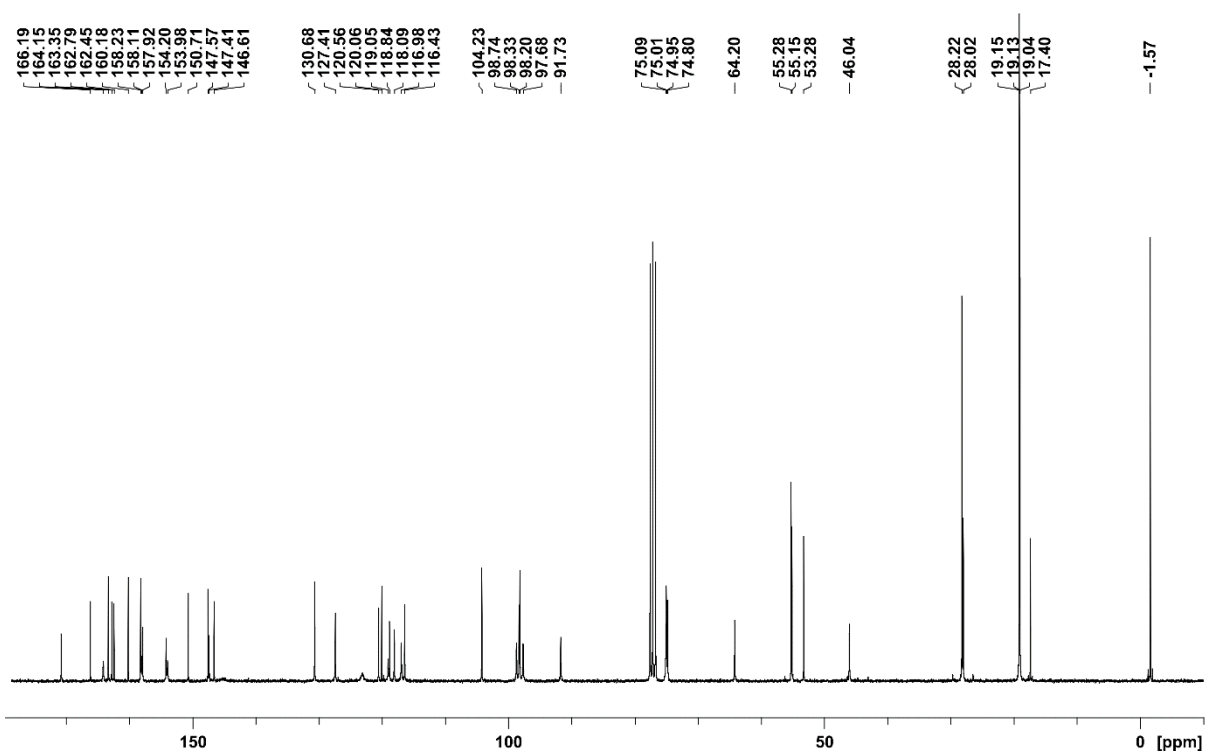

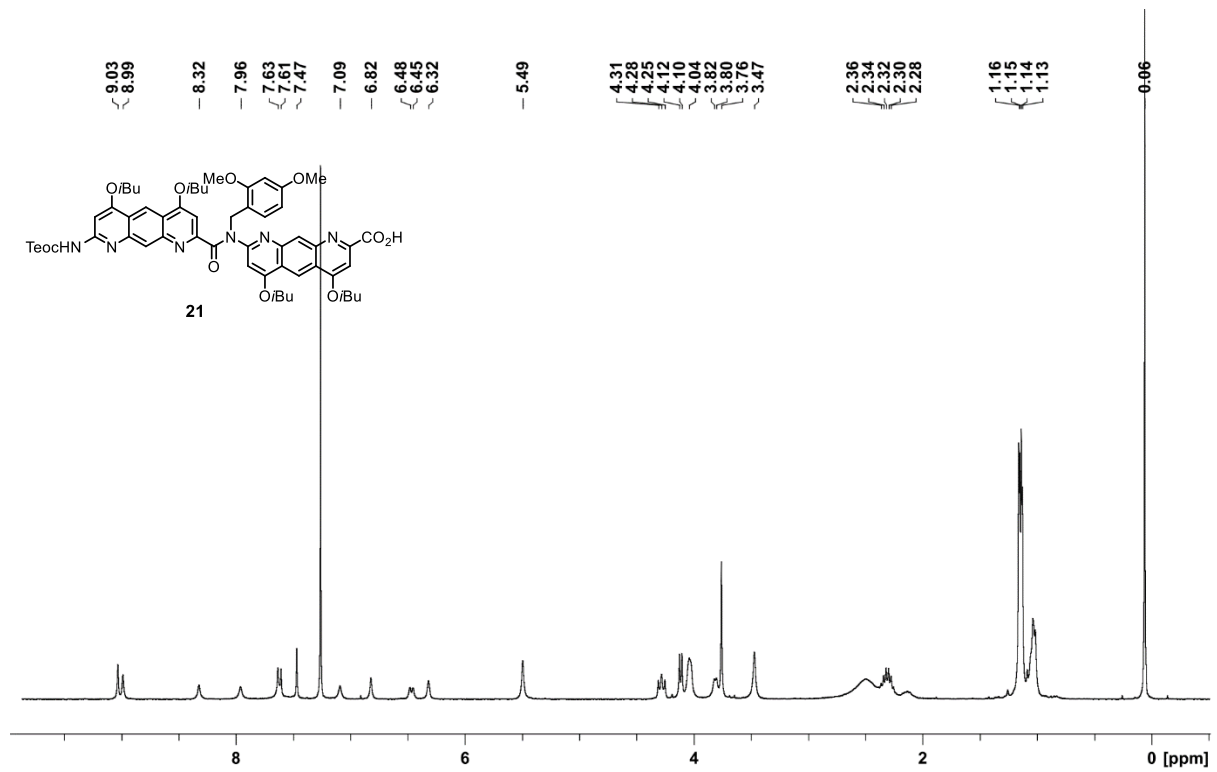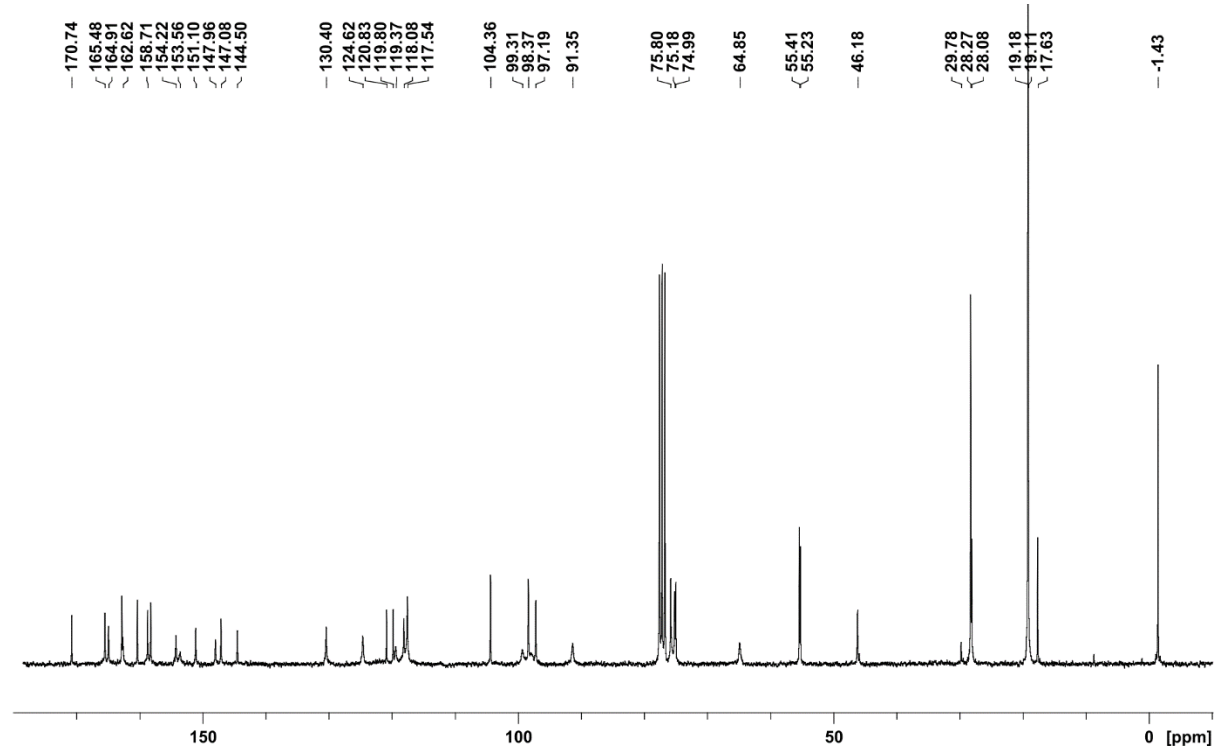

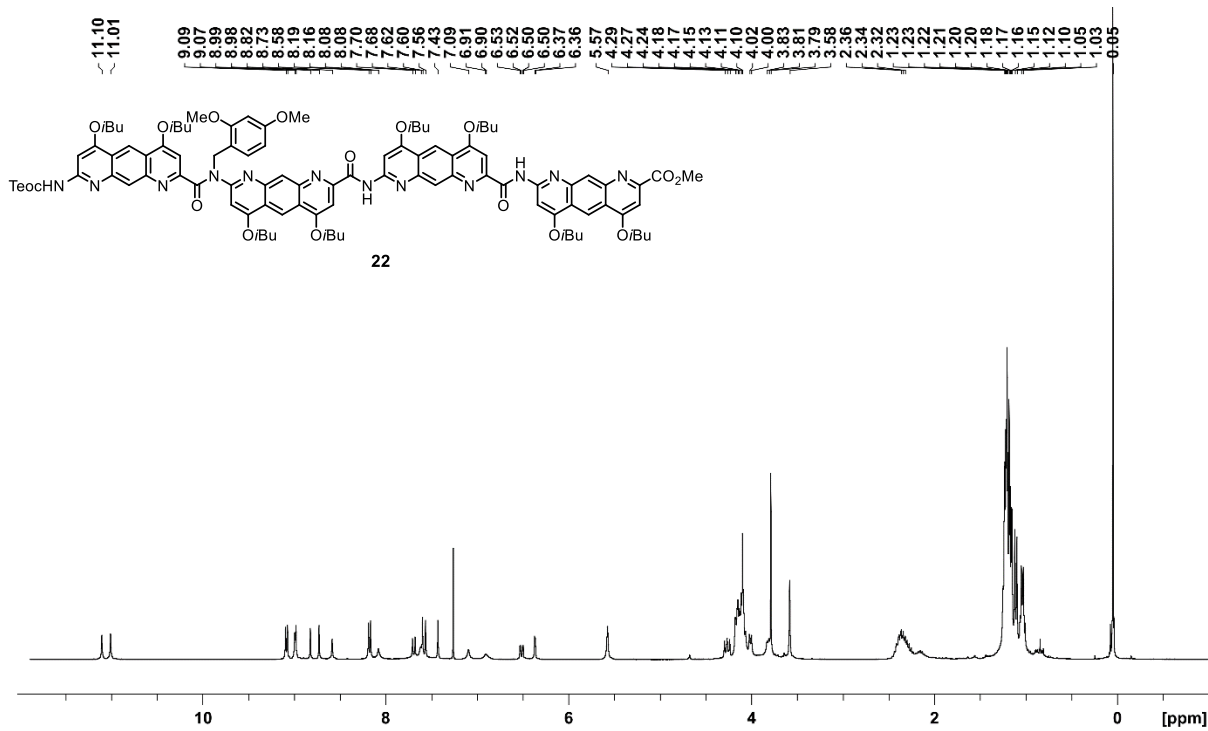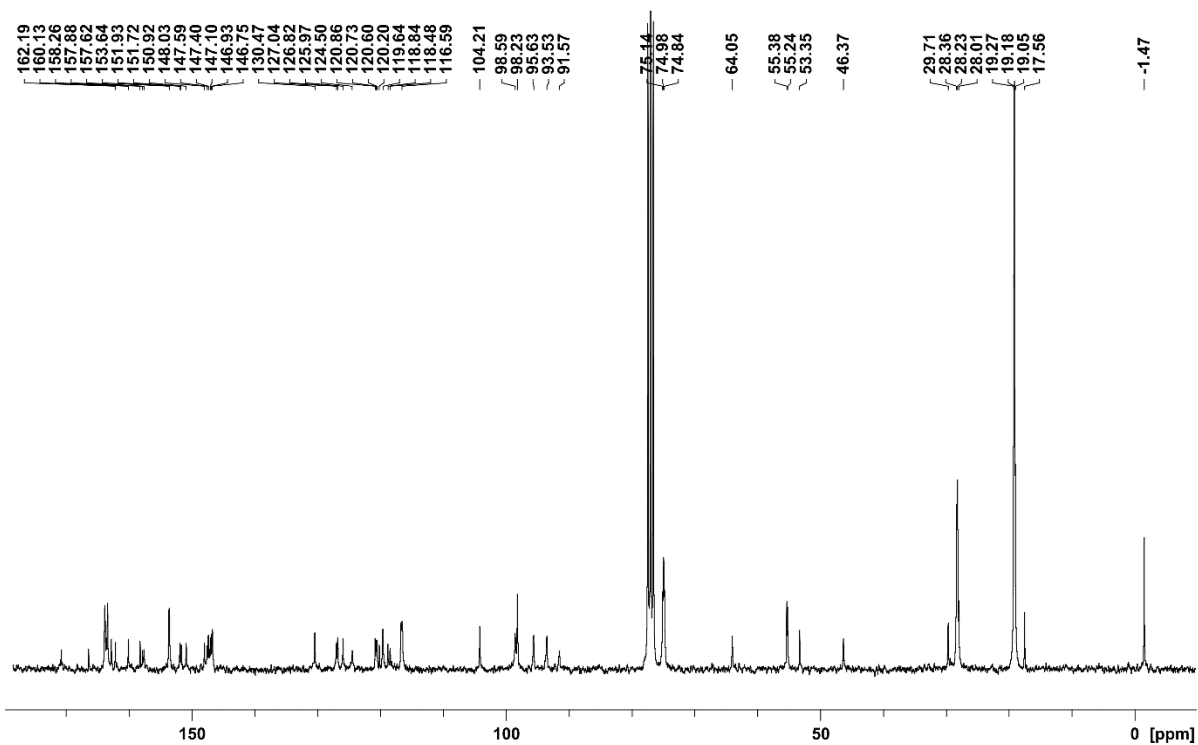



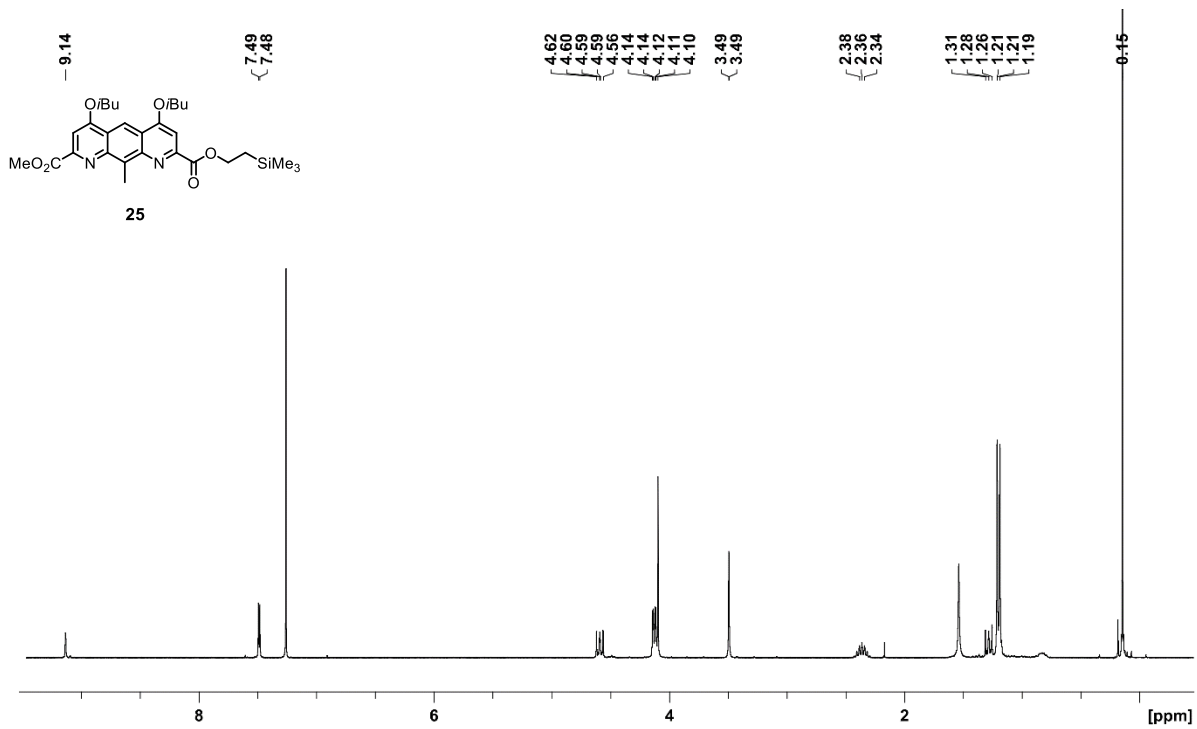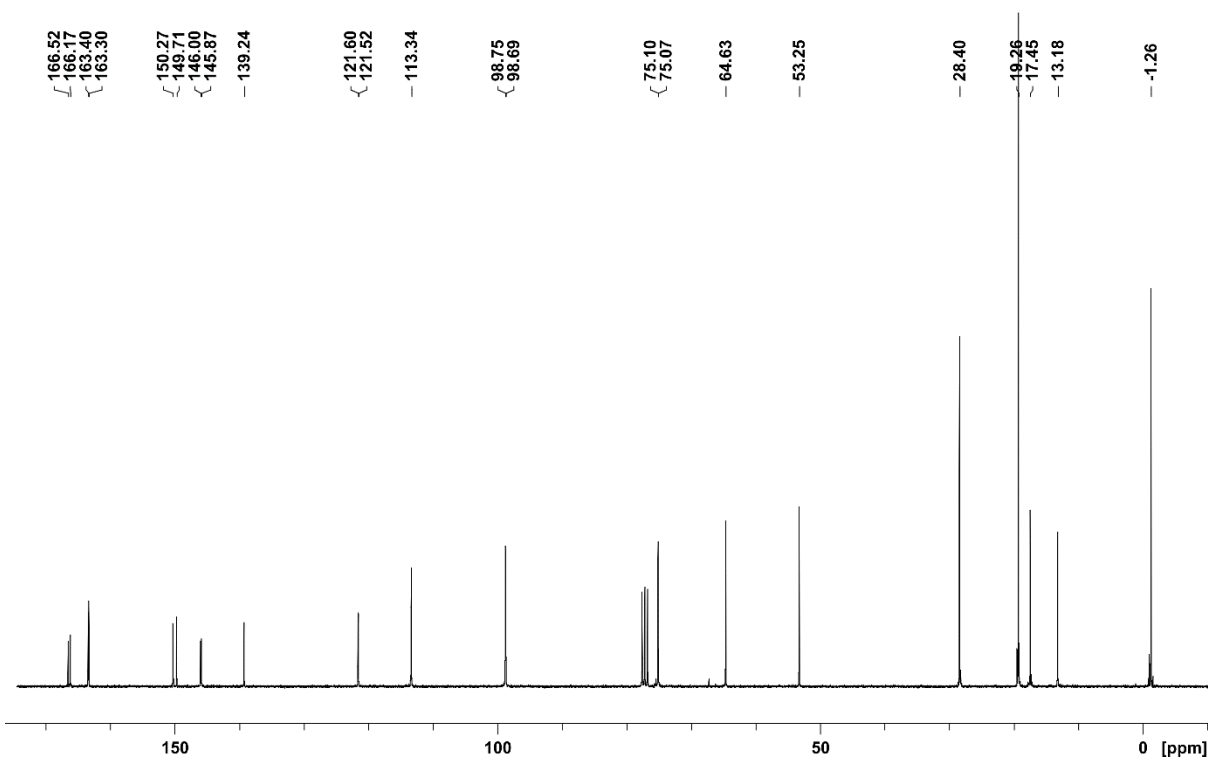

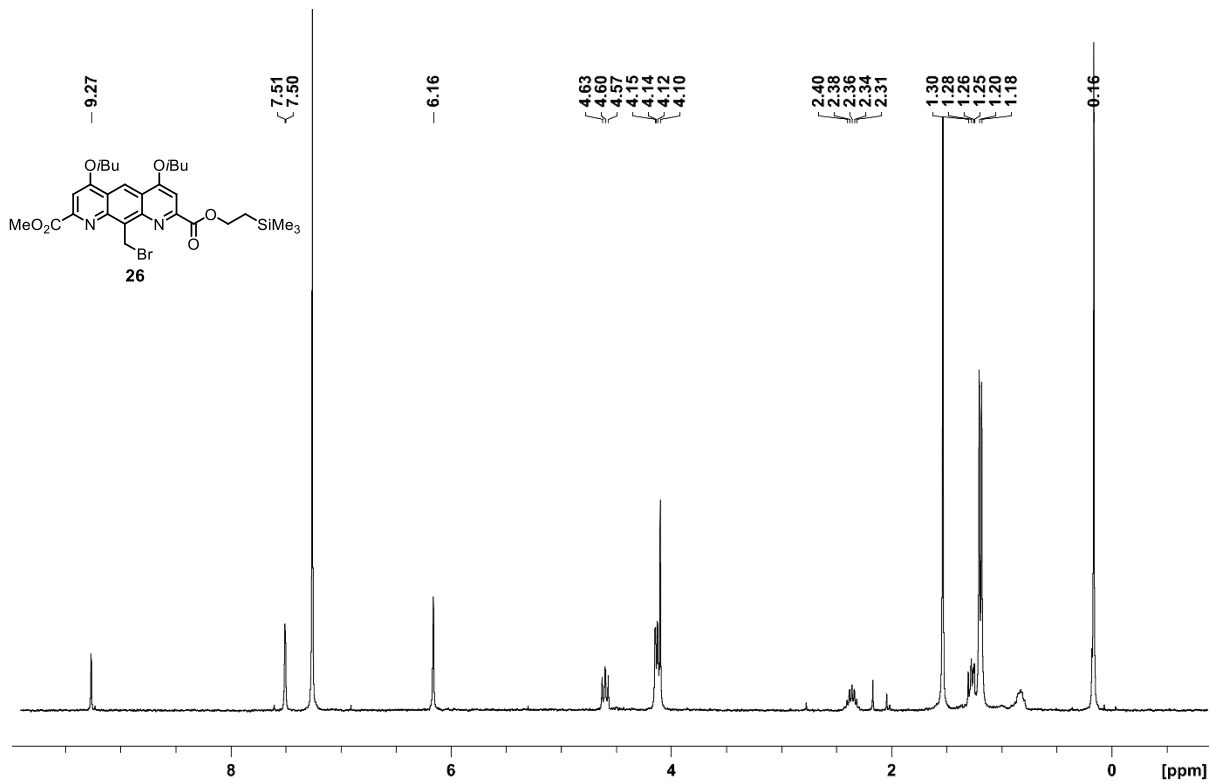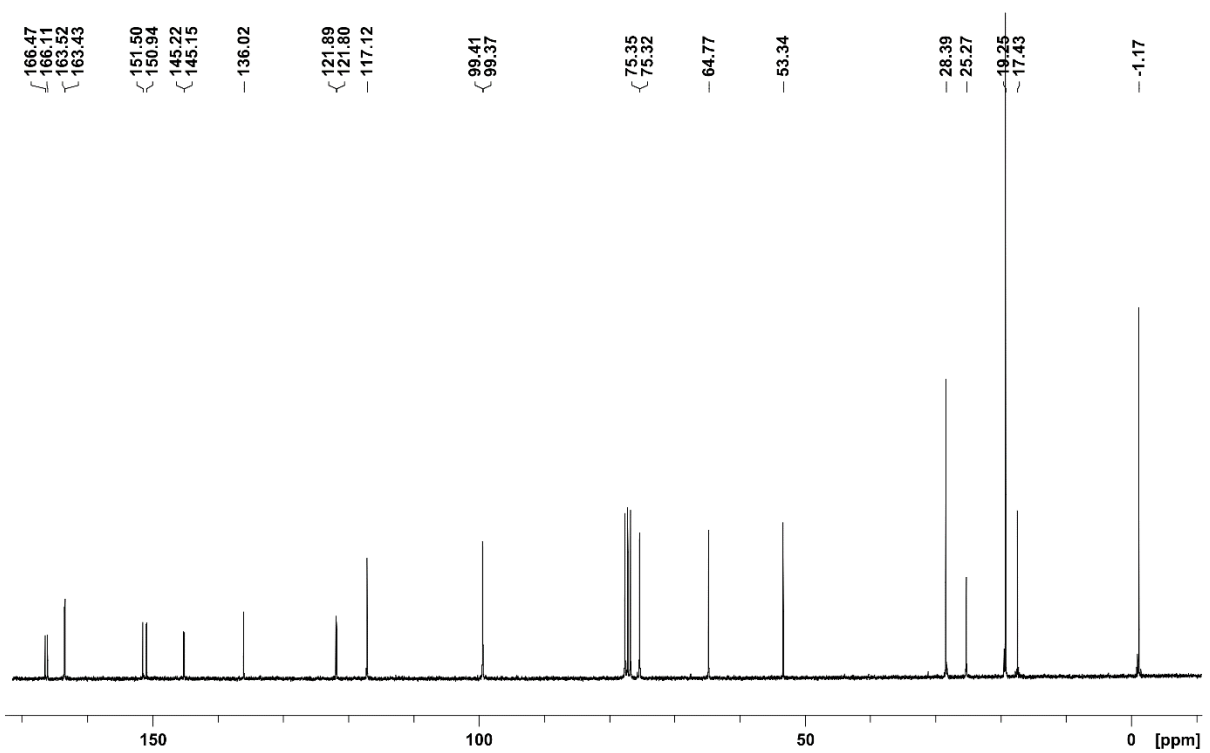

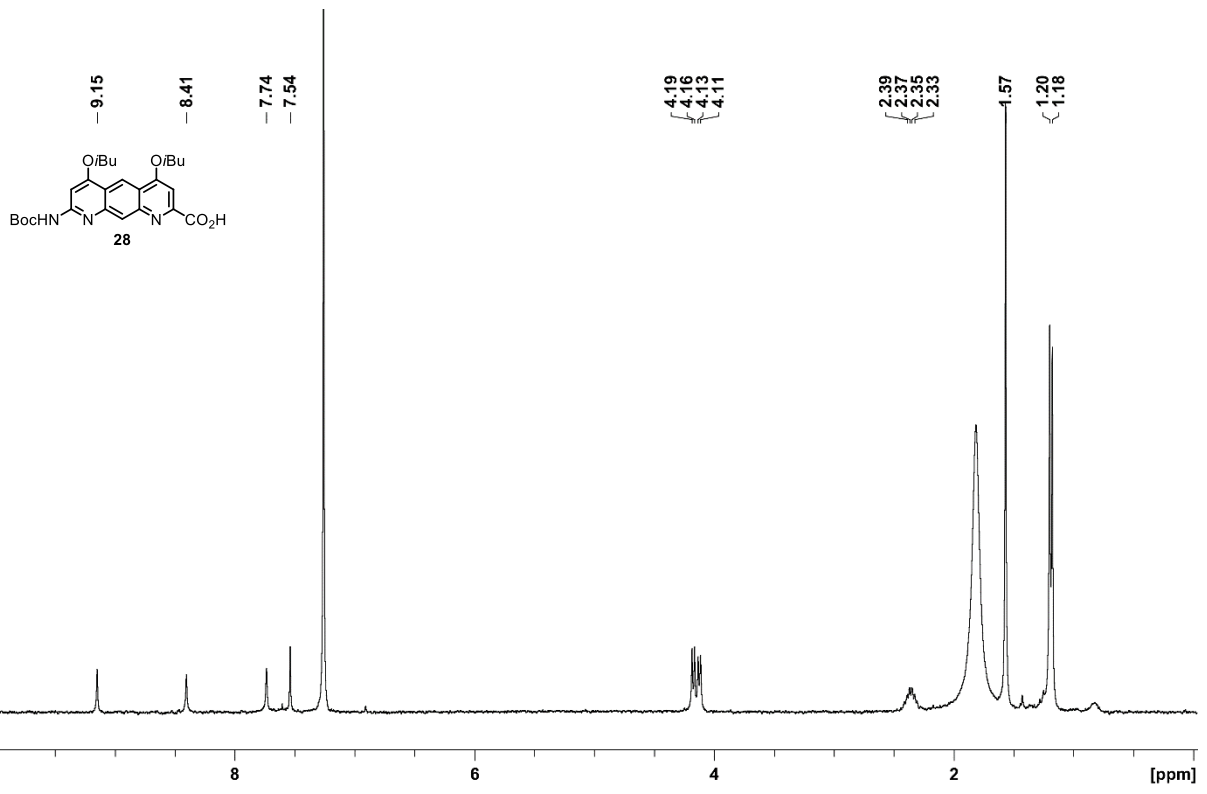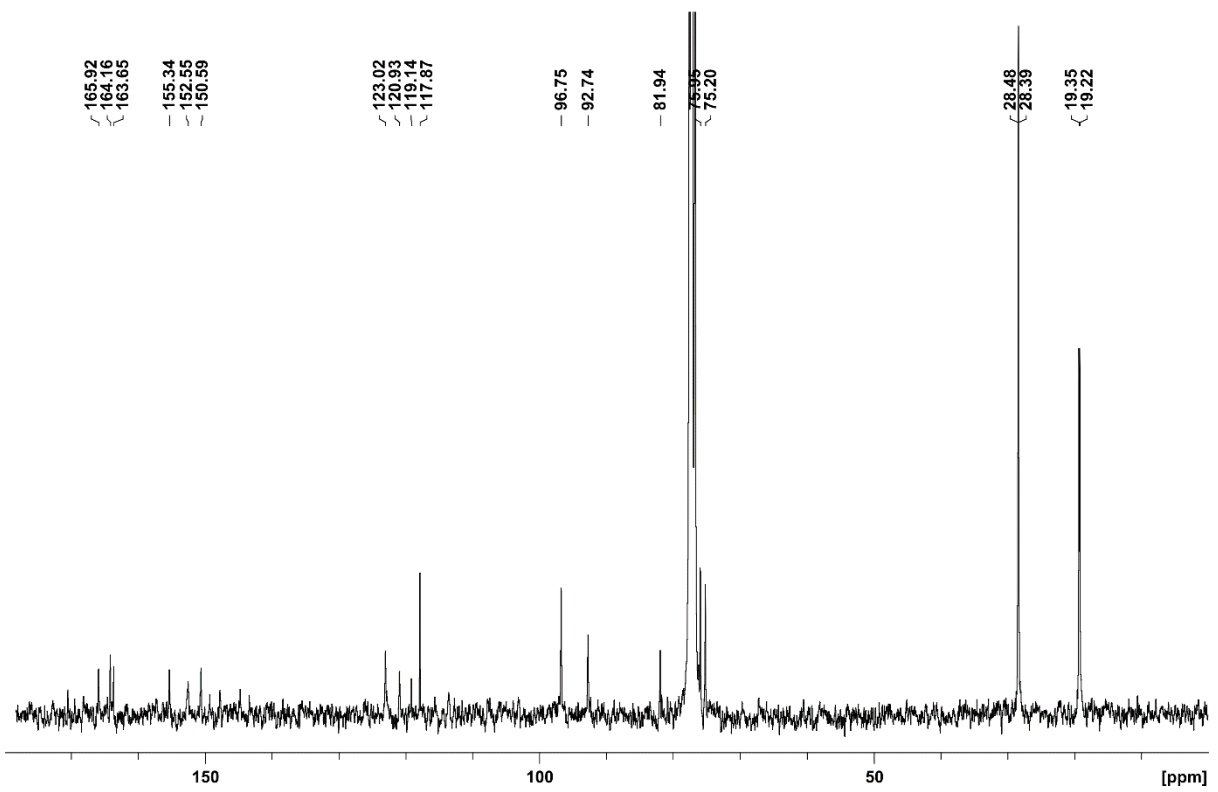

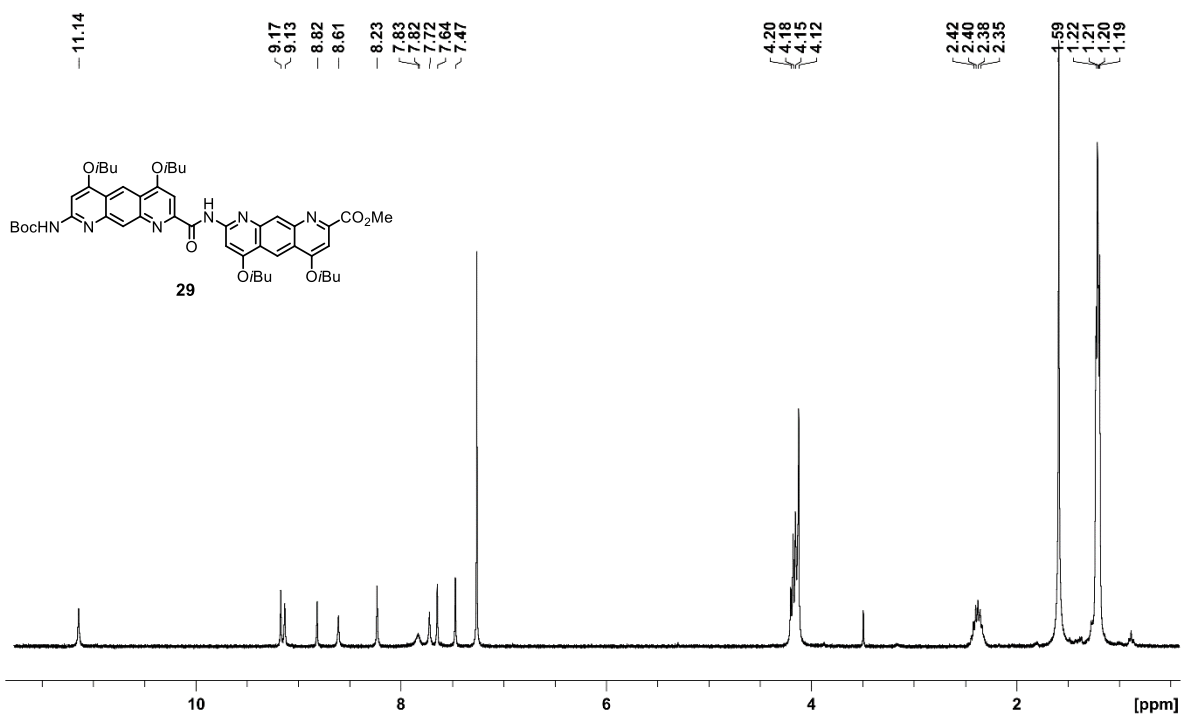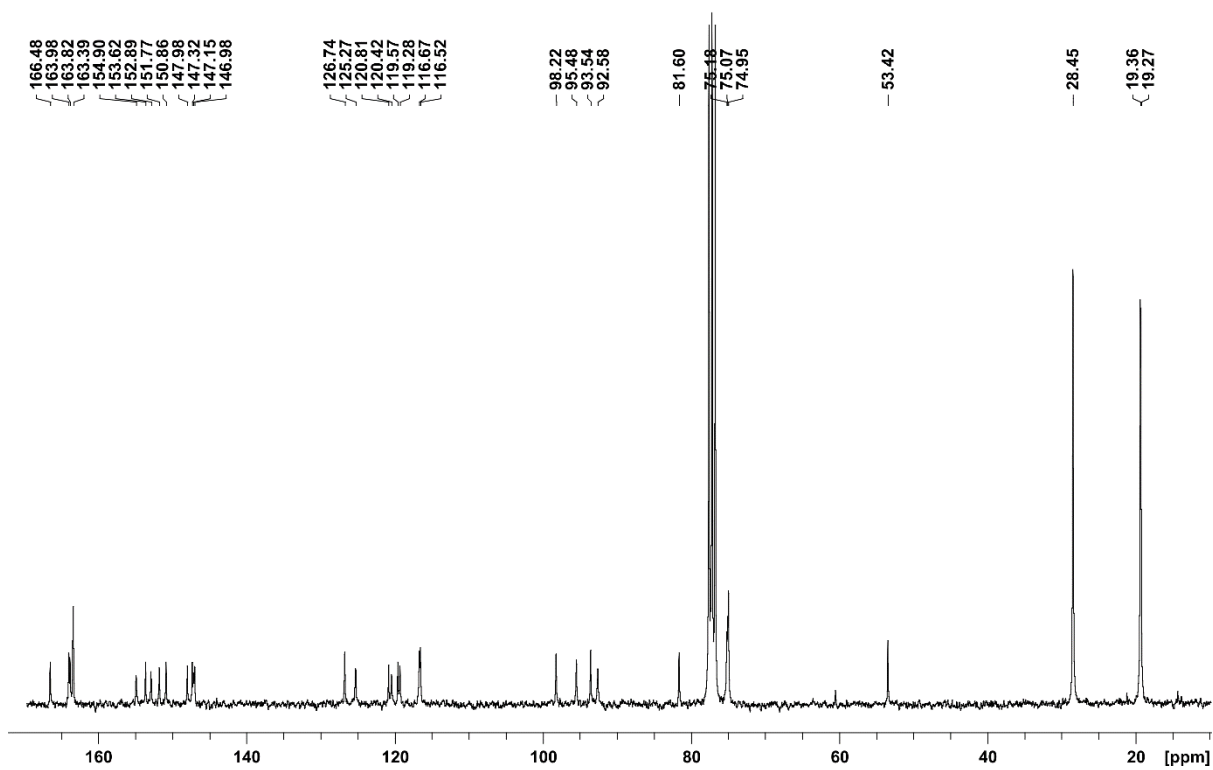

# checkCIF/PLATON report

Structure factors have been supplied for datablock(s) q3pn2afe\_a\_sq

THIS REPORT IS FOR GUIDANCE ONLY. IF USED AS PART OF A REVIEW PROCEDURE FOR PUBLICATION, IT SHOULD NOT REPLACE THE EXPERTISE OF AN EXPERIENCED CRYSTALLOGRAPHIC REFEREE.

No syntax errors found.      CIF dictionary      Interpreting this report

## Datablock: q3pn2afe\_a\_sq

---

Bond precision:    C-C = 0.0264 Å                      Wavelength=1.54178

Cell:                      a=42.379(9)              b=22.277(5)              c=31.801(6)  
                            alpha=90              beta=98.36(3)              gamma=90  
Temperature:              130 K

|                        | Calculated                                          | Reported                                |
|------------------------|-----------------------------------------------------|-----------------------------------------|
| Volume                 | 29704(11)                                           | 29704(11)                               |
| Space group            | C 2/c                                               | C 1 2/c 1                               |
| Hall group             | -C 2yc                                              | -C 2yc                                  |
| Moiety formula         | C104 H102 Fe2 N19 O23 S2,<br>3(C H Cl3) [+ solvent] | C104 H102 Fe2 N19 O23 S2,<br>3(C H Cl3) |
| Sum formula            | C107 H105 Cl9 Fe2 N19 O23<br>S2 [+ solvent]         | C107 H105 Cl9 Fe2 N19 O23<br>S2         |
| Mr                     | 2519.98                                             | 2519.96                                 |
| Dx, g cm <sup>-3</sup> | 1.127                                               | 1.127                                   |
| Z                      | 8                                                   | 8                                       |
| Mu (mm <sup>-1</sup> ) | 3.826                                               | 3.826                                   |
| F000                   | 10408.0                                             | 10408.0                                 |
| F000'                  | 10449.66                                            |                                         |
| h,k,lmax               | 40,21,30                                            | 40,21,30                                |
| Nref                   | 13439                                               | 13285                                   |
| Tmin,Tmax              | 0.716,0.682                                         | 0.283,1.000                             |
| Tmin'                  | 0.650                                               |                                         |

Correction method= # Reported T Limits: Tmin=0.283 Tmax=1.000  
AbsCorr = MULTI-SCAN

Data completeness= 0.989                      Theta(max)= 47.238

R(reflections)= 0.1284( 6926)              wR2(reflections)= 0.3765( 13285)

S = 1.132                                      Npar= 1474

---

The following ALERTS were generated. Each ALERT has the format

**test-name\_ALERT\_alert-type\_alert-level.**

Click on the hyperlinks for more details of the test.

---

### 🔴 Alert level A

THETM01\_ALERT\_3\_A The value of  $\sin(\theta_{\max})/\lambda$  is less than 0.550  
Calculated  $\sin(\theta_{\max})/\lambda = 0.4762$   
PLAT234\_ALERT\_4\_A Large Hirshfeld Difference C8 --C04G . 0.37 Ang.  
PLAT234\_ALERT\_4\_A Large Hirshfeld Difference C01R --C02F . 0.32 Ang.

---

### 🟡 Alert level B

PLAT084\_ALERT\_3\_B High wR2 Value (i.e. > 0.25) ..... 0.38 Report  
PLAT234\_ALERT\_4\_B Large Hirshfeld Difference O00H --C01T . 0.29 Ang.  
PLAT234\_ALERT\_4\_B Large Hirshfeld Difference O00K --C024 . 0.28 Ang.  
PLAT234\_ALERT\_4\_B Large Hirshfeld Difference N015 --C02K . 0.26 Ang.  
PLAT234\_ALERT\_4\_B Large Hirshfeld Difference N01G --C01F . 0.27 Ang.  
PLAT234\_ALERT\_4\_B Large Hirshfeld Difference C01W --C02W . 0.29 Ang.  
PLAT234\_ALERT\_4\_B Large Hirshfeld Difference C01Y --C03I . 0.26 Ang.  
PLAT234\_ALERT\_4\_B Large Hirshfeld Difference C02B --C02E . 0.28 Ang.  
PLAT234\_ALERT\_4\_B Large Hirshfeld Difference C02C --C031 . 0.30 Ang.  
PLAT234\_ALERT\_4\_B Large Hirshfeld Difference C02V --C038 . 0.27 Ang.  
PLAT234\_ALERT\_4\_B Large Hirshfeld Difference C02Y --C03S . 0.26 Ang.  
PLAT234\_ALERT\_4\_B Large Hirshfeld Difference C03B --C03P . 0.28 Ang.  
PLAT234\_ALERT\_4\_B Large Hirshfeld Difference C03E --C04B . 0.26 Ang.  
PLAT234\_ALERT\_4\_B Large Hirshfeld Difference C03F --C045 . 0.28 Ang.  
PLAT234\_ALERT\_4\_B Large Hirshfeld Difference C03K --C03T . 0.26 Ang.  
PLAT234\_ALERT\_4\_B Large Hirshfeld Difference C03X --C03Z . 0.26 Ang.  
PLAT234\_ALERT\_4\_B Large Hirshfeld Difference C048 --C04J . 0.30 Ang.  
PLAT241\_ALERT\_2\_B High 'MainMol' Ueq as Compared to Neighbors of N01G Check  
PLAT242\_ALERT\_2\_B Low 'MainMol' Ueq as Compared to Neighbors of C04G Check  
PLAT260\_ALERT\_2\_B Large Average Ueq of Residue Including C13 0.415 Check  
PLAT260\_ALERT\_2\_B Large Average Ueq of Residue Including C14 0.370 Check  
PLAT341\_ALERT\_3\_B Low Bond Precision on C-C Bonds ..... 0.02641 Ang.  
PLAT369\_ALERT\_2\_B Long C(sp<sup>2</sup>)-C(sp<sup>2</sup>) Bond C010 - C021 . 1.59 Ang.  
PLAT369\_ALERT\_2\_B Long C(sp<sup>2</sup>)-C(sp<sup>2</sup>) Bond C02I - C02Q . 1.57 Ang.

---

### 🟢 Alert level C

ABSTY02\_ALERT\_1\_C An \_exptl\_absorpt\_correction\_type has been given without  
a literature citation. This should be contained in the  
\_exptl\_absorpt\_process\_details field.  
Absorption correction given as multi-scan  
CRYSC01\_ALERT\_1\_C No recognised colour has been given for crystal colour.  
PLAT082\_ALERT\_2\_C High R1 Value ..... 0.13 Report  
PLAT088\_ALERT\_3\_C Poor Data / Parameter Ratio ..... 9.01 Note  
PLAT220\_ALERT\_2\_C NonSolvent Resd 1 C Ueq(max)/Ueq(min) Range 3.5 Ratio  
PLAT230\_ALERT\_2\_C Hirshfeld Test Diff for O00B --C023 . 5.1 s.u.  
PLAT230\_ALERT\_2\_C Hirshfeld Test Diff for N00Q --C01U . 5.2 s.u.  
PLAT230\_ALERT\_2\_C Hirshfeld Test Diff for N015 --C022 . 6.6 s.u.  
PLAT230\_ALERT\_2\_C Hirshfeld Test Diff for C024 --C02V . 5.7 s.u.  
PLAT230\_ALERT\_2\_C Hirshfeld Test Diff for C02F --C03B . 5.5 s.u.  
PLAT234\_ALERT\_4\_C Large Hirshfeld Difference Fe01 --C020 . 0.17 Ang.  
PLAT234\_ALERT\_4\_C Large Hirshfeld Difference Fe01 --C02R . 0.22 Ang.  
PLAT234\_ALERT\_4\_C Large Hirshfeld Difference Fe02 --C032 . 0.24 Ang.  
PLAT234\_ALERT\_4\_C Large Hirshfeld Difference O00A --C026 . 0.17 Ang.  
PLAT234\_ALERT\_4\_C Large Hirshfeld Difference O00C --C02X . 0.19 Ang.  
PLAT234\_ALERT\_4\_C Large Hirshfeld Difference O00I --C02L . 0.21 Ang.  
PLAT234\_ALERT\_4\_C Large Hirshfeld Difference O00I --C03W . 0.20 Ang.  
PLAT234\_ALERT\_4\_C Large Hirshfeld Difference O00O --C02E . 0.18 Ang.

|                   |       |           |                 |                 |        |   |      |       |
|-------------------|-------|-----------|-----------------|-----------------|--------|---|------|-------|
| PLAT234_ALERT_4_C | Large | Hirshfeld | Difference      | O00W            | --C02R | . | 0.19 | Ang.  |
| PLAT234_ALERT_4_C | Large | Hirshfeld | Difference      | O014            | --C02J | . | 0.24 | Ang.  |
| PLAT234_ALERT_4_C | Large | Hirshfeld | Difference      | O017            | --C025 | . | 0.19 | Ang.  |
| PLAT234_ALERT_4_C | Large | Hirshfeld | Difference      | O01C            | --C02Y | . | 0.21 | Ang.  |
| PLAT234_ALERT_4_C | Large | Hirshfeld | Difference      | O01E            | --C032 | . | 0.23 | Ang.  |
| PLAT234_ALERT_4_C | Large | Hirshfeld | Difference      | O01Q            | --C042 | . | 0.22 | Ang.  |
| PLAT234_ALERT_4_C | Large | Hirshfeld | Difference      | N00F            | --C01D | . | 0.19 | Ang.  |
| PLAT234_ALERT_4_C | Large | Hirshfeld | Difference      | N00F            | --C01H | . | 0.20 | Ang.  |
| PLAT234_ALERT_4_C | Large | Hirshfeld | Difference      | N00R            | --C023 | . | 0.19 | Ang.  |
| PLAT234_ALERT_4_C | Large | Hirshfeld | Difference      | N00T            | --C02H | . | 0.17 | Ang.  |
| PLAT234_ALERT_4_C | Large | Hirshfeld | Difference      | N00X            | --C01R | . | 0.22 | Ang.  |
| PLAT234_ALERT_4_C | Large | Hirshfeld | Difference      | N00X            | --C02B | . | 0.21 | Ang.  |
| PLAT234_ALERT_4_C | Large | Hirshfeld | Difference      | N011            | --C029 | . | 0.20 | Ang.  |
| PLAT234_ALERT_4_C | Large | Hirshfeld | Difference      | N012            | --C02E | . | 0.20 | Ang.  |
| PLAT234_ALERT_4_C | Large | Hirshfeld | Difference      | N012            | --C02G | . | 0.21 | Ang.  |
| PLAT234_ALERT_4_C | Large | Hirshfeld | Difference      | N013            | --C02D | . | 0.25 | Ang.  |
| PLAT234_ALERT_4_C | Large | Hirshfeld | Difference      | N013            | --C02Z | . | 0.22 | Ang.  |
| PLAT234_ALERT_4_C | Large | Hirshfeld | Difference      | N01A            | --C024 | . | 0.19 | Ang.  |
| PLAT234_ALERT_4_C | Large | Hirshfeld | Difference      | N01G            | --C01D | . | 0.23 | Ang.  |
| PLAT234_ALERT_4_C | Large | Hirshfeld | Difference      | N01G            | --C036 | . | 0.22 | Ang.  |
| PLAT234_ALERT_4_C | Large | Hirshfeld | Difference      | N01K            | --C029 | . | 0.20 | Ang.  |
| PLAT234_ALERT_4_C | Large | Hirshfeld | Difference      | N01K            | --C02I | . | 0.22 | Ang.  |
| PLAT234_ALERT_4_C | Large | Hirshfeld | Difference      | N01N            | --C02U | . | 0.20 | Ang.  |
| PLAT234_ALERT_4_C | Large | Hirshfeld | Difference      | C01F            | --C01J | . | 0.17 | Ang.  |
| PLAT234_ALERT_4_C | Large | Hirshfeld | Difference      | C01H            | --C023 | . | 0.25 | Ang.  |
| PLAT234_ALERT_4_C | Large | Hirshfeld | Difference      | C01I            | --C01P | . | 0.23 | Ang.  |
| PLAT234_ALERT_4_C | Large | Hirshfeld | Difference      | C01J            | --C020 | . | 0.22 | Ang.  |
| PLAT234_ALERT_4_C | Large | Hirshfeld | Difference      | C01J            | --C026 | . | 0.18 | Ang.  |
| PLAT234_ALERT_4_C | Large | Hirshfeld | Difference      | C01O            | --C021 | . | 0.22 | Ang.  |
| PLAT234_ALERT_4_C | Large | Hirshfeld | Difference      | C01R            | --C02A | . | 0.24 | Ang.  |
| PLAT234_ALERT_4_C | Large | Hirshfeld | Difference      | C01U            | --C02N | . | 0.19 | Ang.  |
| PLAT234_ALERT_4_C | Large | Hirshfeld | Difference      | C02I            | --C02Q | . | 0.21 | Ang.  |
| PLAT234_ALERT_4_C | Large | Hirshfeld | Difference      | C033            | --C030 | . | 0.25 | Ang.  |
| PLAT241_ALERT_2_C | High  | 'MainMol' | Ueq as Compared | to Neighbors of |        |   | O01C | Check |
| PLAT241_ALERT_2_C | High  | 'MainMol' | Ueq as Compared | to Neighbors of |        |   | C01P | Check |
| PLAT241_ALERT_2_C | High  | 'MainMol' | Ueq as Compared | to Neighbors of |        |   | C01T | Check |
| PLAT241_ALERT_2_C | High  | 'MainMol' | Ueq as Compared | to Neighbors of |        |   | C03P | Check |
| PLAT241_ALERT_2_C | High  | 'MainMol' | Ueq as Compared | to Neighbors of |        |   | C03R | Check |
| PLAT241_ALERT_2_C | High  | 'MainMol' | Ueq as Compared | to Neighbors of |        |   | C03S | Check |
| PLAT241_ALERT_2_C | High  | 'MainMol' | Ueq as Compared | to Neighbors of |        |   | C03T | Check |
| PLAT241_ALERT_2_C | High  | 'MainMol' | Ueq as Compared | to Neighbors of |        |   | C03X | Check |
| PLAT241_ALERT_2_C | High  | 'MainMol' | Ueq as Compared | to Neighbors of |        |   | C03Z | Check |
| PLAT242_ALERT_2_C | Low   | 'MainMol' | Ueq as Compared | to Neighbors of |        |   | N00U | Check |
| PLAT242_ALERT_2_C | Low   | 'MainMol' | Ueq as Compared | to Neighbors of |        |   | C01D | Check |
| PLAT242_ALERT_2_C | Low   | 'MainMol' | Ueq as Compared | to Neighbors of |        |   | C01F | Check |
| PLAT242_ALERT_2_C | Low   | 'MainMol' | Ueq as Compared | to Neighbors of |        |   | C01H | Check |
| PLAT242_ALERT_2_C | Low   | 'MainMol' | Ueq as Compared | to Neighbors of |        |   | C02D | Check |
| PLAT242_ALERT_2_C | Low   | 'MainMol' | Ueq as Compared | to Neighbors of |        |   | C02K | Check |
| PLAT242_ALERT_2_C | Low   | 'MainMol' | Ueq as Compared | to Neighbors of |        |   | C02T | Check |
| PLAT242_ALERT_2_C | Low   | 'MainMol' | Ueq as Compared | to Neighbors of |        |   | C02Y | Check |
| PLAT242_ALERT_2_C | Low   | 'MainMol' | Ueq as Compared | to Neighbors of |        |   | C036 | Check |
| PLAT242_ALERT_2_C | Low   | 'MainMol' | Ueq as Compared | to Neighbors of |        |   | C037 | Check |
| PLAT242_ALERT_2_C | Low   | 'MainMol' | Ueq as Compared | to Neighbors of |        |   | C03C | Check |
| PLAT242_ALERT_2_C | Low   | 'MainMol' | Ueq as Compared | to Neighbors of |        |   | C03E | Check |
| PLAT242_ALERT_2_C | Low   | 'MainMol' | Ueq as Compared | to Neighbors of |        |   | C03M | Check |
| PLAT242_ALERT_2_C | Low   | 'MainMol' | Ueq as Compared | to Neighbors of |        |   | C03Q | Check |
| PLAT242_ALERT_2_C | Low   | 'MainMol' | Ueq as Compared | to Neighbors of |        |   | C03W | Check |
| PLAT242_ALERT_2_C | Low   | 'MainMol' | Ueq as Compared | to Neighbors of |        |   | C03Y | Check |
| PLAT242_ALERT_2_C | Low   | 'MainMol' | Ueq as Compared | to Neighbors of |        |   | C04A | Check |
| PLAT244_ALERT_4_C | Low   | 'Solvent' | Ueq as Compared | to Neighbors of |        |   | C040 | Check |
| PLAT244_ALERT_4_C | Low   | 'Solvent' | Ueq as Compared | to Neighbors of |        |   | C04P | Check |
| PLAT244_ALERT_4_C | Low   | 'Solvent' | Ueq as Compared | to Neighbors of |        |   | C04K | Check |

|                   |                                                  |             |       |        |
|-------------------|--------------------------------------------------|-------------|-------|--------|
| PLAT260_ALERT_2_C | Large Average Ueq of Residue Including           | Fe01        | 0.153 | Check  |
| PLAT260_ALERT_2_C | Large Average Ueq of Residue Including           | Cl05        | 0.184 | Check  |
| PLAT336_ALERT_2_C | Long Bond Distance for .....                     | C04K -Cl4   | 1.900 | Ang.   |
| PLAT369_ALERT_2_C | Long C(sp2)-C(sp2) Bond                          | C022 - C02T | 1.55  | Ang.   |
| PLAT906_ALERT_3_C | Large K Value in the Analysis of Variance .....  |             | 9.680 | Check  |
| PLAT906_ALERT_3_C | Large K Value in the Analysis of Variance .....  |             | 3.503 | Check  |
| PLAT906_ALERT_3_C | Large K Value in the Analysis of Variance .....  |             | 2.113 | Check  |
| PLAT911_ALERT_3_C | Missing FCF Refl Between Thmin & STh/L=          | 0.476       | 154   | Report |
| PLAT918_ALERT_3_C | Reflection(s) with I(obs) much Smaller I(calc)   |             | 1     | Check  |
| PLAT923_ALERT_1_C | S Values in the CIF and FCF Differ by .....      |             | 0.013 | Check  |
| PLAT934_ALERT_3_C | Number of (Iobs-Icalc)/Sigma(W) > 10 Outliers .. |             | 1     | Check  |

---

● **Alert level G**

|                   |                                                  |               |       |        |
|-------------------|--------------------------------------------------|---------------|-------|--------|
| PLAT002_ALERT_2_G | Number of Distance or Angle Restraints on AtSite |               | 4     | Note   |
| PLAT003_ALERT_2_G | Number of Uiso or Uij Restrained non-H Atoms ... |               | 5     | Report |
| PLAT007_ALERT_5_G | Number of Unrefined Donor-H Atoms .....          |               | 6     | Report |
| PLAT072_ALERT_2_G | SHELXL First Parameter in WGHT Unusually Large   |               | 0.20  | Report |
| PLAT172_ALERT_4_G | The CIF-Embedded .res File Contains DFIX Records |               | 3     | Report |
| PLAT187_ALERT_4_G | The CIF-Embedded .res File Contains RIGU Records |               | 1     | Report |
| PLAT232_ALERT_2_G | Hirshfeld Test Diff (M-X)                        | Fe01 --C01T   | 6.8   | s.u.   |
| PLAT232_ALERT_2_G | Hirshfeld Test Diff (M-X)                        | Fe02 --C025   | 5.9   | s.u.   |
| PLAT335_ALERT_2_G | Check Large C6 Ring C-C Range                    | C01R -C02F    | 0.15  | Ang.   |
| PLAT335_ALERT_2_G | Check Large C6 Ring C-C Range                    | C022 -C03A    | 0.25  | Ang.   |
| PLAT335_ALERT_2_G | Check Large C6 Ring C-C Range                    | C02G -C03H    | 0.18  | Ang.   |
| PLAT432_ALERT_2_G | Short Inter X...Y Contact                        | O00J ..C04P   | 3.00  | Ang.   |
|                   |                                                  | x,y,z =       | 1_555 | Check  |
| PLAT434_ALERT_2_G | Short Inter HL..HL Contact                       | Cl4 ..Cl4     | 3.19  | Ang.   |
|                   |                                                  | 1-x,y,3/2-z = | 2_656 | Check  |
| PLAT606_ALERT_4_G | Solvent Accessible VOID(S) in Structure .....    |               | !     | Info   |
| PLAT720_ALERT_4_G | Number of Unusual/Non-Standard Labels .....      |               | 256   | Note   |
| PLAT860_ALERT_3_G | Number of Least-Squares Restraints .....         |               | 27    | Note   |
| PLAT869_ALERT_4_G | ALERTS Related to the Use of SQUEEZE Suppressed  |               | !     | Info   |
| PLAT910_ALERT_3_G | Missing # of FCF Reflection(s) Below Theta(Min). |               | 1     | Note   |
| PLAT913_ALERT_3_G | Missing # of Very Strong Reflections in FCF .... |               | 2     | Note   |
| PLAT933_ALERT_2_G | Number of OMIT Records in Embedded .res File ... |               | 3     | Note   |
| PLAT941_ALERT_3_G | Average HKL Measurement Multiplicity .....       |               | 3.5   | Low    |
| PLAT978_ALERT_2_G | Number C-C Bonds with Positive Residual Density. |               | 0     | Info   |

---

3 **ALERT level A** = Most likely a serious problem - resolve or explain  
24 **ALERT level B** = A potentially serious problem, consider carefully  
91 **ALERT level C** = Check. Ensure it is not caused by an omission or oversight  
22 **ALERT level G** = General information/check it is not something unexpected

3 ALERT type 1 CIF construction/syntax error, inconsistent or missing data  
55 ALERT type 2 Indicator that the structure model may be wrong or deficient  
14 ALERT type 3 Indicator that the structure quality may be low  
67 ALERT type 4 Improvement, methodology, query or suggestion  
1 ALERT type 5 Informative message, check

---



It is advisable to attempt to resolve as many as possible of the alerts in all categories. Often the minor alerts point to easily fixed oversights, errors and omissions in your CIF or refinement strategy, so attention to these fine details can be worthwhile. In order to resolve some of the more serious problems it may be necessary to carry out additional measurements or structure refinements. However, the purpose of your study may justify the reported deviations and the more serious of these should normally be commented upon in the discussion or experimental section of a paper or in the "special\_details" fields of the CIF. checkCIF was carefully designed to identify outliers and unusual parameters, but every test has its limitations and alerts that are not important in a particular case may appear. Conversely, the absence of alerts does not guarantee there are no aspects of the results needing attention. It is up to the individual to critically assess their own results and, if necessary, seek expert advice.

### **Publication of your CIF in IUCr journals**

A basic structural check has been run on your CIF. These basic checks will be run on all CIFs submitted for publication in IUCr journals (*Acta Crystallographica*, *Journal of Applied Crystallography*, *Journal of Synchrotron Radiation*); however, if you intend to submit to *Acta Crystallographica Section C* or *E* or *IUCrData*, you should make sure that full publication checks are run on the final version of your CIF prior to submission.

### **Publication of your CIF in other journals**

Please refer to the *Notes for Authors* of the relevant journal for any special instructions relating to CIF submission.

---

**PLATON version of 10/08/2020; check.def file version of 06/08/2020**

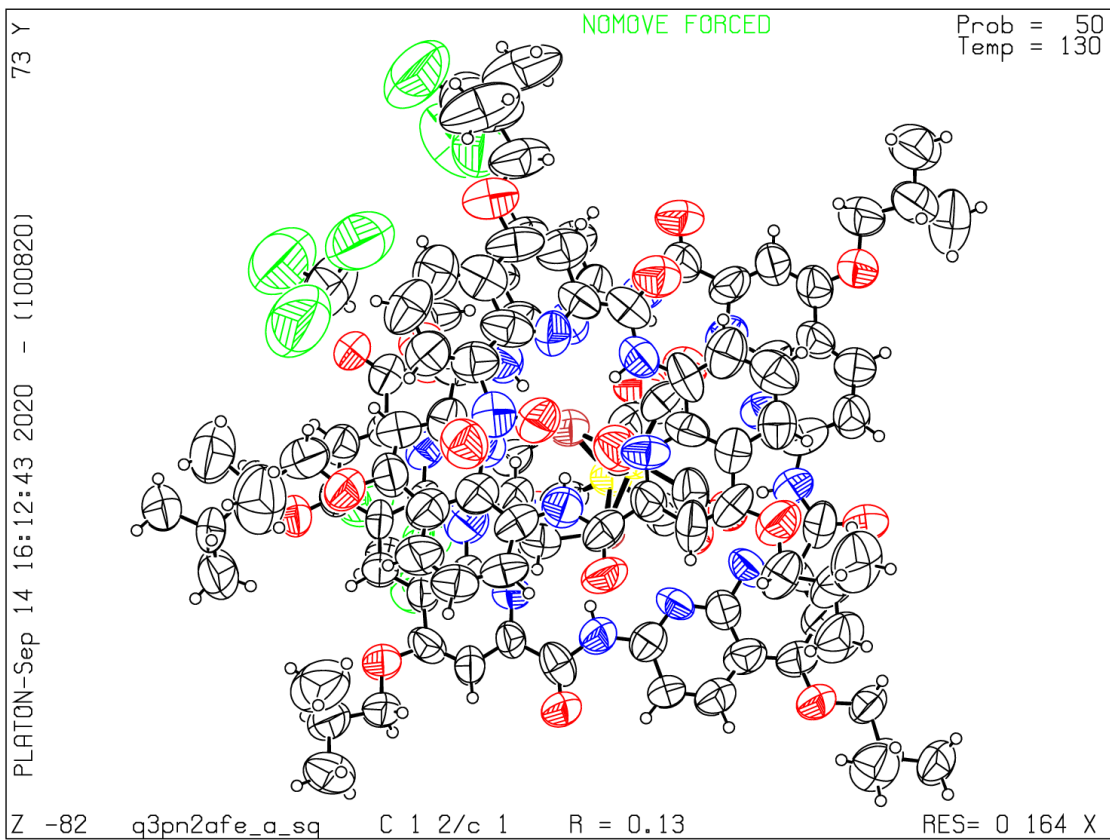

# checkCIF/PLATON report

Structure factors have been supplied for datablock(s) ah2fip\_a\_sq\_sq

THIS REPORT IS FOR GUIDANCE ONLY. IF USED AS PART OF A REVIEW PROCEDURE FOR PUBLICATION, IT SHOULD NOT REPLACE THE EXPERTISE OF AN EXPERIENCED CRYSTALLOGRAPHIC REFEREE.

No syntax errors found.      CIF dictionary      Interpreting this report

## Datablock: ah2fip\_a\_sq\_sq

---

Bond precision:    C-C = 0.0132 A                      Wavelength=0.81000

Cell:                      a=17.679(4)                      b=22.049(4)                      c=25.574(5)  
                                    alpha=72.80(3)                      beta=73.10(3)                      gamma=79.74(3)  
Temperature:            100 K

|                        | Calculated                                       | Reported                        |
|------------------------|--------------------------------------------------|---------------------------------|
| Volume                 | 9065(4)                                          | 9066(4)                         |
| Space group            | P -1                                             | P -1                            |
| Hall group             | -P 1                                             | -P 1                            |
| Moiety formula         | C147 H149 Fe2 N24 O29 S2,<br>C H Cl3 [+ solvent] | ?                               |
| Sum formula            | C148 H150 Cl3 Fe2 N24 O29<br>S2 [+ solvent]      | C148 H150 Cl3 Fe2 N24 O29<br>S2 |
| Mr                     | 3011.10                                          | 3011.08                         |
| Dx, g cm <sup>-3</sup> | 1.103                                            | 1.103                           |
| Z                      | 2                                                | 2                               |
| Mu (mm <sup>-1</sup> ) | 0.413                                            | 0.413                           |
| F000                   | 3146.0                                           | 3146.0                          |
| F000'                  | 3151.13                                          |                                 |
| h,k,lmax               | 19,24,28                                         | 19,24,28                        |
| Nref                   | 26911                                            | 24578                           |
| Tmin,Tmax              | 0.960,0.960                                      |                                 |
| Tmin'                  | 0.960                                            |                                 |

Correction method= Not given

Data completeness= 0.913                      Theta(max)= 27.067

R(reflections)= 0.1129( 15839)                      wR2(reflections)= 0.3608( 24578)

S = 1.367                                      Npar= 1917

---

The following ALERTS were generated. Each ALERT has the format

**test-name\_ALERT\_alert-type\_alert-level.**

Click on the hyperlinks for more details of the test.

---

### 🔴 Alert level A

SHFSU01\_ALERT\_2\_A The absolute value of parameter shift to su ratio > 0.20  
Absolute value of the parameter shift to su ratio given 0.622  
Additional refinement cycles may be required.

PLAT029\_ALERT\_3\_A \_diffn\_measured\_fraction\_theta\_full value Low . 0.913 Why?  
PLAT080\_ALERT\_2\_A Maximum Shift/Error ..... 0.62 Why ?  
PLAT412\_ALERT\_2\_A Short Intra XH3 .. XHn H48A ..H04K . 1.65 Ang.  
x,y,z = 1\_555 Check  
PLAT412\_ALERT\_2\_A Short Intra XH3 .. XHn H48B ..H04X . 1.38 Ang.  
x,y,z = 1\_555 Check  
PLAT412\_ALERT\_2\_A Short Intra XH3 .. XHn H053 ..Hb . 1.69 Ang.  
x,y,z = 1\_555 Check

---

### 🟡 Alert level B

THETM01\_ALERT\_3\_B The value of sine(theta\_max)/wavelength is less than 0.575  
Calculated sin(theta\_max)/wavelength = 0.5618

PLAT031\_ALERT\_4\_B Refined Extinction Parameter Within Range ..... 2.200 Sigma  
PLAT084\_ALERT\_3\_B High wR2 Value (i.e. > 0.25) ..... 0.36 Report  
PLAT242\_ALERT\_2\_B Low 'MainMol' Ueq as Compared to Neighbors of C049 Check  
PLAT242\_ALERT\_2\_B Low 'MainMol' Ueq as Compared to Neighbors of C05E Check  
PLAT360\_ALERT\_2\_B Short C(sp3)-C(sp3) Bond C053 - C05F . 1.24 Ang.  
PLAT416\_ALERT\_2\_B Short Intra D-H..H-D H00T ..H013 . 1.70 Ang.  
x,y,z = 1\_555 Check  
PLAT911\_ALERT\_3\_B Missing FCF Refl Between Thmin & STh/L= 0.562 2324 Report  
PLAT934\_ALERT\_3\_B Number of (Iobs-Icalc)/Sigma(W) > 10 Outliers .. 3 Check

---

### 🟢 Alert level C

PLAT052\_ALERT\_1\_C Info on Absorption Correction Method Not Given Please Do !  
PLAT082\_ALERT\_2\_C High R1 Value ..... 0.11 Report  
PLAT213\_ALERT\_2\_C Atom C12 has ADP max/min Ratio ..... 3.3 prolat  
PLAT213\_ALERT\_2\_C Atom C48 has ADP max/min Ratio ..... 3.4 prolat  
PLAT213\_ALERT\_2\_C Atom C05F has ADP max/min Ratio ..... 3.1 prolat  
PLAT213\_ALERT\_2\_C Atom C05Q has ADP max/min Ratio ..... 3.4 prolat  
PLAT220\_ALERT\_2\_C NonSolvent Resd 1 C Ueq(max)/Ueq(min) Range 5.6 Ratio  
PLAT222\_ALERT\_3\_C NonSolvent Resd 1 H Uiso(max)/Uiso(min) Range 7.0 Ratio  
PLAT232\_ALERT\_2\_C Hirshfeld Test Diff (M-X) Fe02 --S03 . 5.5 s.u.  
PLAT241\_ALERT\_2\_C High 'MainMol' Ueq as Compared to Neighbors of C05A Check  
PLAT241\_ALERT\_2\_C High 'MainMol' Ueq as Compared to Neighbors of C05C Check  
PLAT242\_ALERT\_2\_C Low 'MainMol' Ueq as Compared to Neighbors of 000X Check  
PLAT242\_ALERT\_2\_C Low 'MainMol' Ueq as Compared to Neighbors of 0010 Check  
PLAT242\_ALERT\_2\_C Low 'MainMol' Ueq as Compared to Neighbors of C02N Check  
PLAT242\_ALERT\_2\_C Low 'MainMol' Ueq as Compared to Neighbors of C040 Check  
PLAT242\_ALERT\_2\_C Low 'MainMol' Ueq as Compared to Neighbors of C04K Check  
PLAT242\_ALERT\_2\_C Low 'MainMol' Ueq as Compared to Neighbors of C04W Check  
PLAT242\_ALERT\_2\_C Low 'MainMol' Ueq as Compared to Neighbors of C054 Check  
PLAT242\_ALERT\_2\_C Low 'MainMol' Ueq as Compared to Neighbors of C05I Check  
PLAT244\_ALERT\_4\_C Low 'Solvent' Ueq as Compared to Neighbors of C03F Check  
PLAT250\_ALERT\_2\_C Large U3/U1 Ratio for Average U(i,j) Tensor .... 2.1 Note  
PLAT341\_ALERT\_3\_C Low Bond Precision on C-C Bonds ..... 0.01318 Ang.  
PLAT360\_ALERT\_2\_C Short C(sp3)-C(sp3) Bond C04I - C04M . 1.38 Ang.  
PLAT360\_ALERT\_2\_C Short C(sp3)-C(sp3) Bond C050 - C05Q . 1.42 Ang.  
PLAT369\_ALERT\_2\_C Long C(sp2)-C(sp2) Bond C01J - C021 . 1.53 Ang.  
PLAT369\_ALERT\_2\_C Long C(sp2)-C(sp2) Bond C02E - C02R . 1.53 Ang.  
PLAT369\_ALERT\_2\_C Long C(sp2)-C(sp2) Bond C02T - C03L . 1.53 Ang.

|                   |               |                                              |       |    |         |   |       |       |
|-------------------|---------------|----------------------------------------------|-------|----|---------|---|-------|-------|
| PLAT369_ALERT_2_C | Long          | C(sp <sup>2</sup> )-C(sp <sup>2</sup> ) Bond | C03D  | -  | C041    | . | 1.55  | Ang.  |
| PLAT369_ALERT_2_C | Long          | C(sp <sup>2</sup> )-C(sp <sup>2</sup> ) Bond | C03G  | -  | C045    | . | 1.55  | Ang.  |
| PLAT410_ALERT_2_C | Short         | Intra H...H Contact                          | H04A  | .. | H053    | . | 1.96  | Ang.  |
|                   |               |                                              |       |    | x,y,z = |   | 1_555 | Check |
| PLAT906_ALERT_3_C | Large         | K Value in the Analysis of Variance          | ..... |    |         |   | 7.632 | Check |
| PLAT906_ALERT_3_C | Large         | K Value in the Analysis of Variance          | ..... |    |         |   | 2.623 | Check |
| PLAT910_ALERT_3_C | Missing       | # of FCF Reflection(s) Below Theta(Min).     |       |    |         |   | 8     | Note  |
| PLAT913_ALERT_3_C | Missing       | # of Very Strong Reflections in FCF          | ....  |    |         |   | 25    | Note  |
| PLAT918_ALERT_3_C | Reflection(s) | with I(obs) much Smaller I(calc)             | .     |    |         |   | 1     | Check |
| PLAT977_ALERT_2_C | Check         | Negative Difference Density on Hk            |       |    |         |   | -0.39 | eA-3  |
| PLAT977_ALERT_2_C | Check         | Negative Difference Density on H0AB          |       |    |         |   | -0.36 | eA-3  |

### Alert level G

|                   |                                                  |                                 |    |  |         |   |         |        |
|-------------------|--------------------------------------------------|---------------------------------|----|--|---------|---|---------|--------|
| ABSMU01_ALERT_1_G | Calculation of _exptl_absorpt_correction_mu      |                                 |    |  |         |   |         |        |
|                   | not performed for this radiation type.           |                                 |    |  |         |   |         |        |
| PLAT002_ALERT_2_G | Number of Distance or Angle Restraints on AtSite |                                 |    |  |         |   | 22      | Note   |
| PLAT007_ALERT_5_G | Number of Unrefined Donor-H Atoms                | .....                           |    |  |         |   | 9       | Report |
| PLAT092_ALERT_4_G | Check: Wavelength Given is not Cu,Ga,Mo,Ag,In Ka |                                 |    |  |         |   | 0.81000 | Ang.   |
| PLAT154_ALERT_1_G | The s.u.'s on the Cell Angles are Equal          | ..(Note)                        |    |  |         |   | 0.03    | Degree |
| PLAT171_ALERT_4_G | The CIF-Embedded .res File Contains EADP Records |                                 |    |  |         |   | 1       | Report |
| PLAT172_ALERT_4_G | The CIF-Embedded .res File Contains DFIX Records |                                 |    |  |         |   | 10      | Report |
| PLAT187_ALERT_4_G | The CIF-Embedded .res File Contains RIGU Records |                                 |    |  |         |   | 4       | Report |
| PLAT300_ALERT_4_G | Atom Site Occupancy of C1                        | Constrained at                  |    |  |         |   | 0.5     | Check  |
| PLAT300_ALERT_4_G | Atom Site Occupancy of C2                        | Constrained at                  |    |  |         |   | 0.5     | Check  |
| PLAT300_ALERT_4_G | Atom Site Occupancy of C5                        | Constrained at                  |    |  |         |   | 0.5     | Check  |
| PLAT300_ALERT_4_G | Atom Site Occupancy of C056                      | Constrained at                  |    |  |         |   | 0.5     | Check  |
| PLAT300_ALERT_4_G | Atom Site Occupancy of C05B                      | Constrained at                  |    |  |         |   | 0.5     | Check  |
| PLAT300_ALERT_4_G | Atom Site Occupancy of C05K                      | Constrained at                  |    |  |         |   | 0.5     | Check  |
| PLAT300_ALERT_4_G | Atom Site Occupancy of C05N                      | Constrained at                  |    |  |         |   | 0.5     | Check  |
| PLAT300_ALERT_4_G | Atom Site Occupancy of C0AA                      | Constrained at                  |    |  |         |   | 0.5     | Check  |
| PLAT300_ALERT_4_G | Atom Site Occupancy of H1                        | Constrained at                  |    |  |         |   | 0.5     | Check  |
| PLAT300_ALERT_4_G | Atom Site Occupancy of H2A                       | Constrained at                  |    |  |         |   | 0.5     | Check  |
| PLAT300_ALERT_4_G | Atom Site Occupancy of H2B                       | Constrained at                  |    |  |         |   | 0.5     | Check  |
| PLAT300_ALERT_4_G | Atom Site Occupancy of H2C                       | Constrained at                  |    |  |         |   | 0.5     | Check  |
| PLAT300_ALERT_4_G | Atom Site Occupancy of H5A                       | Constrained at                  |    |  |         |   | 0.5     | Check  |
| PLAT300_ALERT_4_G | Atom Site Occupancy of H5B                       | Constrained at                  |    |  |         |   | 0.5     | Check  |
| PLAT300_ALERT_4_G | Atom Site Occupancy of H05L                      | Constrained at                  |    |  |         |   | 0.5     | Check  |
| PLAT300_ALERT_4_G | Atom Site Occupancy of H05M                      | Constrained at                  |    |  |         |   | 0.5     | Check  |
| PLAT300_ALERT_4_G | Atom Site Occupancy of H05V                      | Constrained at                  |    |  |         |   | 0.5     | Check  |
| PLAT300_ALERT_4_G | Atom Site Occupancy of H05W                      | Constrained at                  |    |  |         |   | 0.5     | Check  |
| PLAT300_ALERT_4_G | Atom Site Occupancy of H05X                      | Constrained at                  |    |  |         |   | 0.5     | Check  |
| PLAT300_ALERT_4_G | Atom Site Occupancy of H8AA                      | Constrained at                  |    |  |         |   | 0.5     | Check  |
| PLAT300_ALERT_4_G | Atom Site Occupancy of Hj                        | Constrained at                  |    |  |         |   | 0.5     | Check  |
| PLAT300_ALERT_4_G | Atom Site Occupancy of Hk                        | Constrained at                  |    |  |         |   | 0.5     | Check  |
| PLAT300_ALERT_4_G | Atom Site Occupancy of H1BA                      | Constrained at                  |    |  |         |   | 0.5     | Check  |
| PLAT300_ALERT_4_G | Atom Site Occupancy of H0AB                      | Constrained at                  |    |  |         |   | 0.5     | Check  |
| PLAT300_ALERT_4_G | Atom Site Occupancy of H0AC                      | Constrained at                  |    |  |         |   | 0.5     | Check  |
| PLAT300_ALERT_4_G | Atom Site Occupancy of H0AD                      | Constrained at                  |    |  |         |   | 0.5     | Check  |
| PLAT301_ALERT_3_G | Main Residue Disorder                            | .....(Resd 1 )                  |    |  |         |   | 2%      | Note   |
| PLAT335_ALERT_2_G | Check Large C6 Ring C-C Range                    | C01U -C02U                      |    |  |         |   | 0.15    | Ang.   |
| PLAT335_ALERT_2_G | Check Large C6 Ring C-C Range                    | C04D -C04X                      |    |  |         |   | 0.19    | Ang.   |
| PLAT343_ALERT_2_G | Unusual sp <sup>3</sup>                          | Angle Range in Main Residue for |    |  |         |   | C053    | Check  |
| PLAT410_ALERT_2_G | Short Intra H...H Contact                        | H02G                            | .. |  | H05L    | . | 2.12    | Ang.   |
|                   |                                                  |                                 |    |  | x,y,z = |   | 1_555   | Check  |
| PLAT606_ALERT_4_G | Solvent Accessible VOID(S) in Structure          | .....                           |    |  |         |   | !       | Info   |
| PLAT720_ALERT_4_G | Number of Unusual/Non-Standard Labels            | .....                           |    |  |         |   | 353     | Note   |
| PLAT860_ALERT_3_G | Number of Least-Squares Restraints               | .....                           |    |  |         |   | 1707    | Note   |
| PLAT869_ALERT_4_G | ALERTS Related to the Use of SQUEEZE Suppressed  |                                 |    |  |         |   | !       | Info   |
| PLAT883_ALERT_1_G | No Info/Value for _atom_sites_solution_primary   |                                 |    |  |         |   | Please  | Do !   |
| PLAT933_ALERT_2_G | Number of OMIT Records in Embedded .res File     | ...                             |    |  |         |   | 14      | Note   |

|                   |                                                  |        |       |
|-------------------|--------------------------------------------------|--------|-------|
| PLAT941_ALERT_3_G | Average HKL Measurement Multiplicity .....       | 3.8    | Low   |
| PLAT961_ALERT_5_G | Dataset Contains no Negative Intensities .....   | Please | Check |
| PLAT978_ALERT_2_G | Number C-C Bonds with Positive Residual Density. | 0      | Info  |
| PLAT984_ALERT_1_G | The Cl-f' = 0.1831 Deviates from the B&C-Value   | 0.1809 | Check |
| PLAT984_ALERT_1_G | The Fe-f' = 0.3573 Deviates from the B&C-Value   | 0.3558 | Check |
| PLAT984_ALERT_1_G | The S-f' = 0.1552 Deviates from the B&C-Value    | 0.1530 | Check |
| PLAT985_ALERT_1_G | The Cl-f" = 0.2090 Deviates from the B&C-Value   | 0.2068 | Check |
| PLAT985_ALERT_1_G | The Fe-f" = 1.0787 Deviates from the B&C-Value   | 1.0748 | Check |
| PLAT985_ALERT_1_G | The S-f" = 0.1633 Deviates from the B&C-Value    | 0.1616 | Check |

---

6 **ALERT level A** = Most likely a serious problem - resolve or explain  
9 **ALERT level B** = A potentially serious problem, consider carefully  
37 **ALERT level C** = Check. Ensure it is not caused by an omission or oversight  
54 **ALERT level G** = General information/check it is not something unexpected

10 ALERT type 1 CIF construction/syntax error, inconsistent or missing data  
44 ALERT type 2 Indicator that the structure model may be wrong or deficient  
15 ALERT type 3 Indicator that the structure quality may be low  
35 ALERT type 4 Improvement, methodology, query or suggestion  
2 ALERT type 5 Informative message, check

---

It is advisable to attempt to resolve as many as possible of the alerts in all categories. Often the minor alerts point to easily fixed oversights, errors and omissions in your CIF or refinement strategy, so attention to these fine details can be worthwhile. In order to resolve some of the more serious problems it may be necessary to carry out additional measurements or structure refinements. However, the purpose of your study may justify the reported deviations and the more serious of these should normally be commented upon in the discussion or experimental section of a paper or in the "special\_details" fields of the CIF. checkCIF was carefully designed to identify outliers and unusual parameters, but every test has its limitations and alerts that are not important in a particular case may appear. Conversely, the absence of alerts does not guarantee there are no aspects of the results needing attention. It is up to the individual to critically assess their own results and, if necessary, seek expert advice.

### **Publication of your CIF in IUCr journals**

A basic structural check has been run on your CIF. These basic checks will be run on all CIFs submitted for publication in IUCr journals (*Acta Crystallographica*, *Journal of Applied Crystallography*, *Journal of Synchrotron Radiation*); however, if you intend to submit to *Acta Crystallographica Section C* or *E* or *IUCrData*, you should make sure that full publication checks are run on the final version of your CIF prior to submission.

### **Publication of your CIF in other journals**

Please refer to the *Notes for Authors* of the relevant journal for any special instructions relating to CIF submission.

---

**PLATON version of 10/08/2020; check.def file version of 06/08/2020**

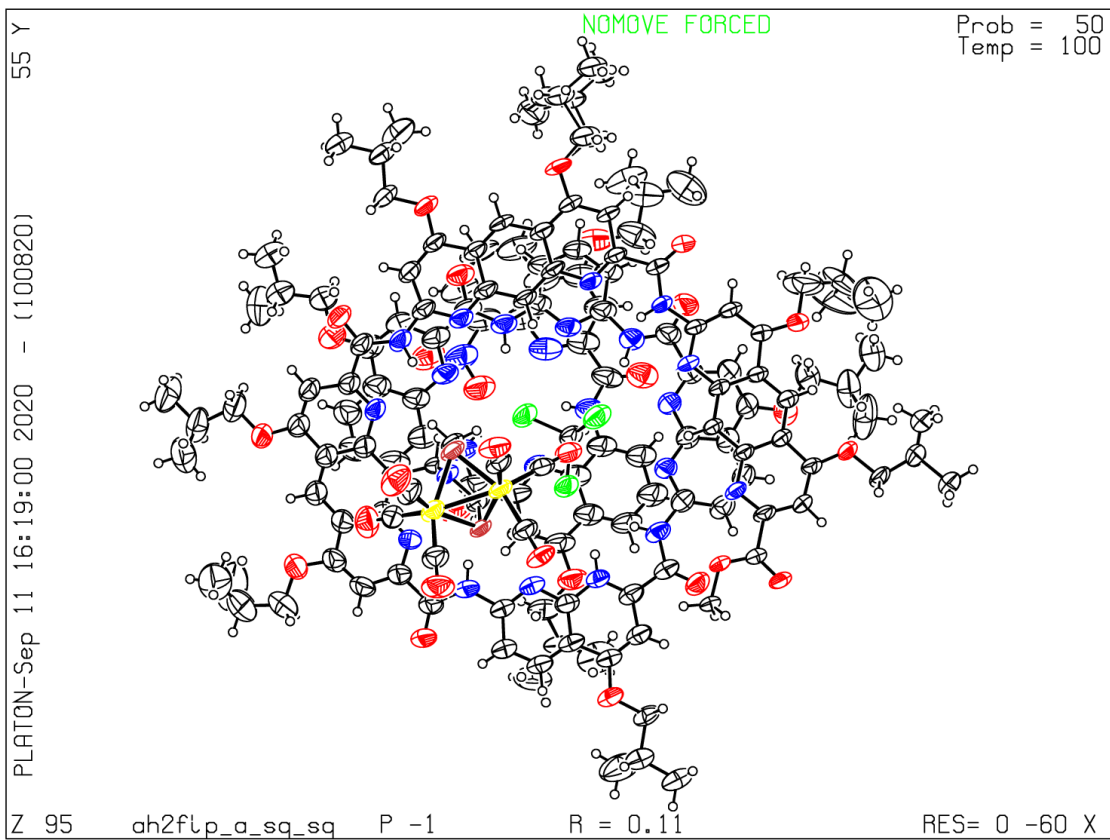

# checkCIF/PLATON report

Structure factors have been supplied for datablock(s) squeezed

THIS REPORT IS FOR GUIDANCE ONLY. IF USED AS PART OF A REVIEW PROCEDURE FOR PUBLICATION, IT SHOULD NOT REPLACE THE EXPERTISE OF AN EXPERIENCED CRYSTALLOGRAPHIC REFEREE.

No syntax errors found.      CIF dictionary      Interpreting this report

## Datablock: squeezed

---

Bond precision:    C-C = 0.0232 A

Wavelength=1.54178

Cell:                a=26.6118(13)        b=29.0835(13)        c=36.1175(12)  
                      alpha=83.259(3)      beta=82.984(3)      gamma=68.182(4)  
Temperature:        100 K

|                        | Calculated                              | Reported                        |
|------------------------|-----------------------------------------|---------------------------------|
| Volume                 | 25678(2)                                | 25678(2)                        |
| Space group            | P -1                                    | P -1                            |
| Hall group             | -P 1                                    | -P 1                            |
| Moiety formula         | C198 H204 Fe2 N30 O37 S2,<br>2(C H Cl3) | ?                               |
| Sum formula            | C200 H206 Cl6 Fe2 N30 O37<br>S2         | C200 H206 Cl6 Fe2 N30 O37<br>S2 |
| Mr                     | 4010.48                                 | 4010.46                         |
| Dx, g cm <sup>-3</sup> | 1.037                                   | 1.037                           |
| Z                      | 4                                       | 4                               |
| Mu (mm <sup>-1</sup> ) | 2.149                                   | 2.149                           |
| F000                   | 8392.0                                  | 8392.0                          |
| F000'                  | 8418.56                                 |                                 |
| h,k,lmax               | 24,26,32                                | 24,26,32                        |
| Nref                   | 39970                                   | 35867                           |
| Tmin,Tmax              | 0.807,0.807                             |                                 |
| Tmin'                  | 0.807                                   |                                 |

Correction method= Not given

Data completeness= 0.897

Theta(max)= 44.284

R(reflections)= 0.1170( 9759)

wR2(reflections)= 0.2564( 35867)

S = 1.088

Npar= 4990

---



The following ALERTS were generated. Each ALERT has the format

**test-name\_ALERT\_alert-type\_alert-level.**

Click on the hyperlinks for more details of the test.

---

**Alert level A**

THETM01\_ALERT\_3\_A The value of sine(theta\_max)/wavelength is less than 0.550  
Calculated sin(theta\_max)/wavelength = 0.4529  
PLAT026\_ALERT\_3\_A Ratio Observed / Unique Reflections (too) Low .. 27 %  
PLAT029\_ALERT\_3\_A \_diffrn\_measured\_fraction\_theta\_full value Low . 0.897 Note  
PLAT602\_ALERT\_2\_A VERY LARGE Solvent Accessible VOID(S) in Structure ! Info

---

**Alert level B**

REFNR01\_ALERT\_3\_B Ratio of reflections to parameters is < 8 for a  
centrosymmetric structure  
sine(theta)/lambda 0.4529  
Proportion of unique data used 1.0000  
Ratio reflections to parameters 7.1878  
PLAT088\_ALERT\_3\_B Poor Data / Parameter Ratio ..... 7.19 Note  
PLAT220\_ALERT\_2\_B Non-Solvent Resd 2 C Ueq(max)/Ueq(min) Range 6.1 Ratio  
PLAT241\_ALERT\_2\_B High 'MainMol' Ueq as Compared to Neighbors of O31\_13 Check  
PLAT241\_ALERT\_2\_B High 'MainMol' Ueq as Compared to Neighbors of C15\_1 Check  
PLAT241\_ALERT\_2\_B High 'MainMol' Ueq as Compared to Neighbors of C33\_1 Check  
PLAT241\_ALERT\_2\_B High 'MainMol' Ueq as Compared to Neighbors of Cg\_7 Check  
PLAT241\_ALERT\_2\_B High 'MainMol' Ueq as Compared to Neighbors of O21\_42 Check  
PLAT241\_ALERT\_2\_B High 'MainMol' Ueq as Compared to Neighbors of C22\_31 Check  
PLAT241\_ALERT\_2\_B High 'MainMol' Ueq as Compared to Neighbors of C32\_31 Check  
PLAT241\_ALERT\_2\_B High 'MainMol' Ueq as Compared to Neighbors of C33\_31 Check  
PLAT241\_ALERT\_2\_B High 'MainMol' Ueq as Compared to Neighbors of C3\_35 Check  
PLAT241\_ALERT\_2\_B High 'MainMol' Ueq as Compared to Neighbors of C23\_45 Check  
PLAT241\_ALERT\_2\_B High 'MainMol' Ueq as Compared to Neighbors of C5\_72 Check  
PLAT241\_ALERT\_2\_B High 'MainMol' Ueq as Compared to Neighbors of C\_78 Check  
PLAT242\_ALERT\_2\_B Low 'MainMol' Ueq as Compared to Neighbors of Ob\_7 Check  
PLAT242\_ALERT\_2\_B Low 'MainMol' Ueq as Compared to Neighbors of O\_16 Check  
PLAT242\_ALERT\_2\_B Low 'MainMol' Ueq as Compared to Neighbors of N\_5 Check  
PLAT242\_ALERT\_2\_B Low 'MainMol' Ueq as Compared to Neighbors of C22\_1 Check  
PLAT242\_ALERT\_2\_B Low 'MainMol' Ueq as Compared to Neighbors of Cd\_7 Check  
PLAT242\_ALERT\_2\_B Low 'MainMol' Ueq as Compared to Neighbors of C23\_12 Check  
PLAT242\_ALERT\_2\_B Low 'MainMol' Ueq as Compared to Neighbors of C33\_12 Check  
PLAT242\_ALERT\_2\_B Low 'MainMol' Ueq as Compared to Neighbors of C33\_13 Check  
PLAT242\_ALERT\_2\_B Low 'MainMol' Ueq as Compared to Neighbors of C22\_15 Check  
PLAT242\_ALERT\_2\_B Low 'MainMol' Ueq as Compared to Neighbors of O31\_31 Check  
PLAT242\_ALERT\_2\_B Low 'MainMol' Ueq as Compared to Neighbors of O8\_72 Check  
PLAT242\_ALERT\_2\_B Low 'MainMol' Ueq as Compared to Neighbors of N\_35 Check  
PLAT242\_ALERT\_2\_B Low 'MainMol' Ueq as Compared to Neighbors of C23\_31 Check  
PLAT242\_ALERT\_2\_B Low 'MainMol' Ueq as Compared to Neighbors of C16\_33 Check  
PLAT242\_ALERT\_2\_B Low 'MainMol' Ueq as Compared to Neighbors of Cd\_37 Check  
PLAT242\_ALERT\_2\_B Low 'MainMol' Ueq as Compared to Neighbors of C22\_42 Check  
PLAT242\_ALERT\_2\_B Low 'MainMol' Ueq as Compared to Neighbors of C11\_42 Check  
PLAT242\_ALERT\_2\_B Low 'MainMol' Ueq as Compared to Neighbors of C33\_43 Check  
PLAT242\_ALERT\_2\_B Low 'MainMol' Ueq as Compared to Neighbors of C23\_44 Check  
PLAT242\_ALERT\_2\_B Low 'MainMol' Ueq as Compared to Neighbors of C22\_45 Check  
PLAT242\_ALERT\_2\_B Low 'MainMol' Ueq as Compared to Neighbors of C33\_45 Check  
PLAT242\_ALERT\_2\_B Low 'MainMol' Ueq as Compared to Neighbors of C7\_72 Check  
PLAT341\_ALERT\_3\_B Low Bond Precision on C-C Bonds ..... 0.02318 Ang.  
PLAT411\_ALERT\_2\_B Short Inter H...H Contact H3\_4 .. H1\_87 . 1.86 Ang.  
PLAT413\_ALERT\_2\_B Short Inter XH3 .. XHn H18A\_32.. H34B\_42 .. 1.92 Ang.  
PLAT911\_ALERT\_3\_B Missing # FCF Refl Between THmin & STh/L= 0.453 4100 Report

---

● Alert level C

|                   |                                      |                                 |              |
|-------------------|--------------------------------------|---------------------------------|--------------|
| PLAT052_ALERT_1_C | Info on Absorption Correction Method | Not Given                       | Please Do !  |
| PLAT082_ALERT_2_C | High R1 Value .....                  |                                 | 0.12 Report  |
| PLAT084_ALERT_3_C | High wR2 Value (i.e. > 0.25) .....   |                                 | 0.26 Report  |
| PLAT213_ALERT_2_C | Atom C25_1                           | has ADP max/min Ratio .....     | 3.3 prolat   |
| PLAT213_ALERT_2_C | Atom C3_1                            | has ADP max/min Ratio .....     | 3.3 oblate   |
| PLAT213_ALERT_2_C | Atom C35_13                          | has ADP max/min Ratio .....     | 3.9 prolat   |
| PLAT213_ALERT_2_C | Atom C23_15                          | has ADP max/min Ratio .....     | 3.4 prolat   |
| PLAT213_ALERT_2_C | Atom O_54                            | has ADP max/min Ratio .....     | 3.6 prolat   |
| PLAT213_ALERT_2_C | Atom C25_31                          | has ADP max/min Ratio .....     | 3.1 prolat   |
| PLAT213_ALERT_2_C | Atom C22_31                          | has ADP max/min Ratio .....     | 3.5 prolat   |
| PLAT213_ALERT_2_C | Atom C33_31                          | has ADP max/min Ratio .....     | 3.5 prolat   |
| PLAT213_ALERT_2_C | Atom C24_44                          | has ADP max/min Ratio .....     | 3.7 prolat   |
| PLAT213_ALERT_2_C | Atom C23_45                          | has ADP max/min Ratio .....     | 3.3 oblate   |
| PLAT213_ALERT_2_C | Atom C35_45                          | has ADP max/min Ratio .....     | 3.1 oblate   |
| PLAT213_ALERT_2_C | Atom C9_72                           | has ADP max/min Ratio .....     | 3.5 prolat   |
| PLAT214_ALERT_2_C | Atom Cl_85 (Anion/Solvent)           | ADP max/min Ratio               | 4.7 prolat   |
| PLAT220_ALERT_2_C | Non-Solvent Resd 1                   | C Ueq(max)/Ueq(min) Range       | 5.4 Ratio    |
| PLAT220_ALERT_2_C | Non-Solvent Resd 2                   | O Ueq(max)/Ueq(min) Range       | 3.1 Ratio    |
| PLAT222_ALERT_3_C | Non-Solvent Resd 1                   | H Uiso(max)/Uiso(min) Range     | 5.7 Ratio    |
| PLAT222_ALERT_3_C | Non-Solvent Resd 2                   | H Uiso(max)/Uiso(min) Range     | 7.6 Ratio    |
| PLAT241_ALERT_2_C | High 'MainMol'                       | Ueq as Compared to Neighbors of | O21_1 Check  |
| PLAT241_ALERT_2_C | High 'MainMol'                       | Ueq as Compared to Neighbors of | Ob_5 Check   |
| PLAT241_ALERT_2_C | High 'MainMol'                       | Ueq as Compared to Neighbors of | Ob_6 Check   |
| PLAT241_ALERT_2_C | High 'MainMol'                       | Ueq as Compared to Neighbors of | O21_13 Check |
| PLAT241_ALERT_2_C | High 'MainMol'                       | Ueq as Compared to Neighbors of | N63_1 Check  |
| PLAT241_ALERT_2_C | High 'MainMol'                       | Ueq as Compared to Neighbors of | N0_15 Check  |
| PLAT241_ALERT_2_C | High 'MainMol'                       | Ueq as Compared to Neighbors of | C7_1 Check   |
| PLAT241_ALERT_2_C | High 'MainMol'                       | Ueq as Compared to Neighbors of | C6_1 Check   |
| PLAT241_ALERT_2_C | High 'MainMol'                       | Ueq as Compared to Neighbors of | C3_2 Check   |
| PLAT241_ALERT_2_C | High 'MainMol'                       | Ueq as Compared to Neighbors of | C8_2 Check   |
| PLAT241_ALERT_2_C | High 'MainMol'                       | Ueq as Compared to Neighbors of | C4_3 Check   |
| PLAT241_ALERT_2_C | High 'MainMol'                       | Ueq as Compared to Neighbors of | C3_4 Check   |
| PLAT241_ALERT_2_C | High 'MainMol'                       | Ueq as Compared to Neighbors of | C6_4 Check   |
| PLAT241_ALERT_2_C | High 'MainMol'                       | Ueq as Compared to Neighbors of | C5_5 Check   |
| PLAT241_ALERT_2_C | High 'MainMol'                       | Ueq as Compared to Neighbors of | C9_5 Check   |
| PLAT241_ALERT_2_C | High 'MainMol'                       | Ueq as Compared to Neighbors of | C3_6 Check   |
| PLAT241_ALERT_2_C | High 'MainMol'                       | Ueq as Compared to Neighbors of | C4_6 Check   |
| PLAT241_ALERT_2_C | High 'MainMol'                       | Ueq as Compared to Neighbors of | C4_7 Check   |
| PLAT241_ALERT_2_C | High 'MainMol'                       | Ueq as Compared to Neighbors of | C8_7 Check   |
| PLAT241_ALERT_2_C | High 'MainMol'                       | Ueq as Compared to Neighbors of | C9_12 Check  |
| PLAT241_ALERT_2_C | High 'MainMol'                       | Ueq as Compared to Neighbors of | C2_13 Check  |
| PLAT241_ALERT_2_C | High 'MainMol'                       | Ueq as Compared to Neighbors of | C6_14 Check  |
| PLAT241_ALERT_2_C | High 'MainMol'                       | Ueq as Compared to Neighbors of | C12_15 Check |
| PLAT241_ALERT_2_C | High 'MainMol'                       | Ueq as Compared to Neighbors of | C10_15 Check |
| PLAT241_ALERT_2_C | High 'MainMol'                       | Ueq as Compared to Neighbors of | C7_15 Check  |
| PLAT241_ALERT_2_C | High 'MainMol'                       | Ueq as Compared to Neighbors of | C7_71 Check  |
| PLAT241_ALERT_2_C | High 'MainMol'                       | Ueq as Compared to Neighbors of | Ob_35 Check  |
| PLAT241_ALERT_2_C | High 'MainMol'                       | Ueq as Compared to Neighbors of | Ob_36 Check  |
| PLAT241_ALERT_2_C | High 'MainMol'                       | Ueq as Compared to Neighbors of | O21_43 Check |
| PLAT241_ALERT_2_C | High 'MainMol'                       | Ueq as Compared to Neighbors of | O10_72 Check |
| PLAT241_ALERT_2_C | High 'MainMol'                       | Ueq as Compared to Neighbors of | N14_31 Check |
| PLAT241_ALERT_2_C | High 'MainMol'                       | Ueq as Compared to Neighbors of | N63_31 Check |
| PLAT241_ALERT_2_C | High 'MainMol'                       | Ueq as Compared to Neighbors of | N1_33 Check  |
| PLAT241_ALERT_2_C | High 'MainMol'                       | Ueq as Compared to Neighbors of | N_36 Check   |
| PLAT241_ALERT_2_C | High 'MainMol'                       | Ueq as Compared to Neighbors of | N0_45 Check  |
| PLAT241_ALERT_2_C | High 'MainMol'                       | Ueq as Compared to Neighbors of | C12_31 Check |
| PLAT241_ALERT_2_C | High 'MainMol'                       | Ueq as Compared to Neighbors of | C10_31 Check |
| PLAT241_ALERT_2_C | High 'MainMol'                       | Ueq as Compared to Neighbors of | C7_31 Check  |
| PLAT241_ALERT_2_C | High 'MainMol'                       | Ueq as Compared to Neighbors of | C61_31 Check |
| PLAT241_ALERT_2_C | High 'MainMol'                       | Ueq as Compared to Neighbors of | C62_31 Check |



|                   |        |                               |                    |    |          |    |           |    |           |       |
|-------------------|--------|-------------------------------|--------------------|----|----------|----|-----------|----|-----------|-------|
| PLAT242_ALERT_2_C | Low    | 'MainMol'                     | Ueq                | as | Compared | to | Neighbors | of | C4_71     | Check |
| PLAT242_ALERT_2_C | Low    | 'MainMol'                     | Ueq                | as | Compared | to | Neighbors | of | C_74      | Check |
| PLAT242_ALERT_2_C | Low    | 'MainMol'                     | Ueq                | as | Compared | to | Neighbors | of | C_75      | Check |
| PLAT242_ALERT_2_C | Low    | 'MainMol'                     | Ueq                | as | Compared | to | Neighbors | of | C_76      | Check |
| PLAT242_ALERT_2_C | Low    | 'MainMol'                     | Ueq                | as | Compared | to | Neighbors | of | C_82      | Check |
| PLAT242_ALERT_2_C | Low    | 'MainMol'                     | Ueq                | as | Compared | to | Neighbors | of | Fe02_50   | Check |
| PLAT242_ALERT_2_C | Low    | 'MainMol'                     | Ueq                | as | Compared | to | Neighbors | of | S64_31    | Check |
| PLAT242_ALERT_2_C | Low    | 'MainMol'                     | Ueq                | as | Compared | to | Neighbors | of | S65_31    | Check |
| PLAT242_ALERT_2_C | Low    | 'MainMol'                     | Ueq                | as | Compared | to | Neighbors | of | O21_31    | Check |
| PLAT242_ALERT_2_C | Low    | 'MainMol'                     | Ueq                | as | Compared | to | Neighbors | of | O31_42    | Check |
| PLAT242_ALERT_2_C | Low    | 'MainMol'                     | Ueq                | as | Compared | to | Neighbors | of | O_46      | Check |
| PLAT242_ALERT_2_C | Low    | 'MainMol'                     | Ueq                | as | Compared | to | Neighbors | of | N7_33     | Check |
| PLAT242_ALERT_2_C | Low    | 'MainMol'                     | Ueq                | as | Compared | to | Neighbors | of | N11_35    | Check |
| PLAT242_ALERT_2_C | Low    | 'MainMol'                     | Ueq                | as | Compared | to | Neighbors | of | N_37      | Check |
| PLAT242_ALERT_2_C | Low    | 'MainMol'                     | Ueq                | as | Compared | to | Neighbors | of | N14_43    | Check |
| PLAT242_ALERT_2_C | Low    | 'MainMol'                     | Ueq                | as | Compared | to | Neighbors | of | N6_43     | Check |
| PLAT242_ALERT_2_C | Low    | 'MainMol'                     | Ueq                | as | Compared | to | Neighbors | of | N0_43     | Check |
| PLAT242_ALERT_2_C | Low    | 'MainMol'                     | Ueq                | as | Compared | to | Neighbors | of | N6_44     | Check |
| PLAT242_ALERT_2_C | Low    | 'MainMol'                     | Ueq                | as | Compared | to | Neighbors | of | C13_31    | Check |
| PLAT242_ALERT_2_C | Low    | 'MainMol'                     | Ueq                | as | Compared | to | Neighbors | of | C9_31     | Check |
| PLAT242_ALERT_2_C | Low    | 'MainMol'                     | Ueq                | as | Compared | to | Neighbors | of | C4_31     | Check |
| PLAT242_ALERT_2_C | Low    | 'MainMol'                     | Ueq                | as | Compared | to | Neighbors | of | C1_31     | Check |
| PLAT242_ALERT_2_C | Low    | 'MainMol'                     | Ueq                | as | Compared | to | Neighbors | of | C60_31    | Check |
| PLAT242_ALERT_2_C | Low    | 'MainMol'                     | Ueq                | as | Compared | to | Neighbors | of | C16_32    | Check |
| PLAT242_ALERT_2_C | Low    | 'MainMol'                     | Ueq                | as | Compared | to | Neighbors | of | C5_32     | Check |
| PLAT242_ALERT_2_C | Low    | 'MainMol'                     | Ueq                | as | Compared | to | Neighbors | of | C12_32    | Check |
| PLAT242_ALERT_2_C | Low    | 'MainMol'                     | Ueq                | as | Compared | to | Neighbors | of | C15_32    | Check |
| PLAT242_ALERT_2_C | Low    | 'MainMol'                     | Ueq                | as | Compared | to | Neighbors | of | C8_33     | Check |
| PLAT242_ALERT_2_C | Low    | 'MainMol'                     | Ueq                | as | Compared | to | Neighbors | of | C2_35     | Check |
| PLAT242_ALERT_2_C | Low    | 'MainMol'                     | Ueq                | as | Compared | to | Neighbors | of | C8_35     | Check |
| PLAT242_ALERT_2_C | Low    | 'MainMol'                     | Ueq                | as | Compared | to | Neighbors | of | C9_35     | Check |
| PLAT242_ALERT_2_C | Low    | 'MainMol'                     | Ueq                | as | Compared | to | Neighbors | of | C_35      | Check |
| PLAT242_ALERT_2_C | Low    | 'MainMol'                     | Ueq                | as | Compared | to | Neighbors | of | C2_36     | Check |
| PLAT242_ALERT_2_C | Low    | 'MainMol'                     | Ueq                | as | Compared | to | Neighbors | of | Cg_36     | Check |
| PLAT242_ALERT_2_C | Low    | 'MainMol'                     | Ueq                | as | Compared | to | Neighbors | of | Cd_36     | Check |
| PLAT242_ALERT_2_C | Low    | 'MainMol'                     | Ueq                | as | Compared | to | Neighbors | of | C3_37     | Check |
| PLAT242_ALERT_2_C | Low    | 'MainMol'                     | Ueq                | as | Compared | to | Neighbors | of | C7_37     | Check |
| PLAT242_ALERT_2_C | Low    | 'MainMol'                     | Ueq                | as | Compared | to | Neighbors | of | C9_37     | Check |
| PLAT242_ALERT_2_C | Low    | 'MainMol'                     | Ueq                | as | Compared | to | Neighbors | of | C13_42    | Check |
| PLAT242_ALERT_2_C | Low    | 'MainMol'                     | Ueq                | as | Compared | to | Neighbors | of | C7_42     | Check |
| PLAT242_ALERT_2_C | Low    | 'MainMol'                     | Ueq                | as | Compared | to | Neighbors | of | C33_42    | Check |
| PLAT242_ALERT_2_C | Low    | 'MainMol'                     | Ueq                | as | Compared | to | Neighbors | of | C22_43    | Check |
| PLAT242_ALERT_2_C | Low    | 'MainMol'                     | Ueq                | as | Compared | to | Neighbors | of | C2_43     | Check |
| PLAT242_ALERT_2_C | Low    | 'MainMol'                     | Ueq                | as | Compared | to | Neighbors | of | C2_44     | Check |
| PLAT242_ALERT_2_C | Low    | 'MainMol'                     | Ueq                | as | Compared | to | Neighbors | of | C33_44    | Check |
| PLAT242_ALERT_2_C | Low    | 'MainMol'                     | Ueq                | as | Compared | to | Neighbors | of | C13_45    | Check |
| PLAT242_ALERT_2_C | Low    | 'MainMol'                     | Ueq                | as | Compared | to | Neighbors | of | C1_45     | Check |
| PLAT242_ALERT_2_C | Low    | 'MainMol'                     | Ueq                | as | Compared | to | Neighbors | of | C1_72     | Check |
| PLAT242_ALERT_2_C | Low    | 'MainMol'                     | Ueq                | as | Compared | to | Neighbors | of | C4_72     | Check |
| PLAT242_ALERT_2_C | Low    | 'MainMol'                     | Ueq                | as | Compared | to | Neighbors | of | C_79      | Check |
| PLAT242_ALERT_2_C | Low    | 'MainMol'                     | Ueq                | as | Compared | to | Neighbors | of | C_80      | Check |
| PLAT244_ALERT_4_C | Low    | 'Solvent'                     | Ueq                | as | Compared | to | Neighbors | of | C1_85     | Check |
| PLAT244_ALERT_4_C | Low    | 'Solvent'                     | Ueq                | as | Compared | to | Neighbors | of | C1_86     | Check |
| PLAT244_ALERT_4_C | Low    | 'Solvent'                     | Ueq                | as | Compared | to | Neighbors | of | C1_87     | Check |
| PLAT244_ALERT_4_C | Low    | 'Solvent'                     | Ueq                | as | Compared | to | Neighbors | of | C1_88     | Check |
| PLAT309_ALERT_2_C | Single | Bonded Oxygen (C-O > 1.3 Ang) | .....              |    |          |    |           |    | O4#       | Check |
| PLAT309_ALERT_2_C | Single | Bonded Oxygen (C-O > 1.3 Ang) | .....              |    |          |    |           |    | O31#      | Check |
| PLAT361_ALERT_2_C | Long   | C(sp3)-C(sp3) Bond            | C32_12 - C33_12 .. |    |          |    |           |    | 1.65 Ang. |       |
| PLAT361_ALERT_2_C | Long   | C(sp3)-C(sp3) Bond            | C33_31 - C35_31 .. |    |          |    |           |    | 1.65 Ang. |       |
| PLAT410_ALERT_2_C | Short  | Intra H...H Contact           | H2_1 .. H32A_1 .   |    |          |    |           |    | 1.93 Ang. |       |
| PLAT410_ALERT_2_C | Short  | Intra H...H Contact           | H9_5 .. Hg2_5 .    |    |          |    |           |    | 1.96 Ang. |       |
| PLAT413_ALERT_2_C | Short  | Inter XH3 .. XHn              | Hd_6 .. He2B_37 .. |    |          |    |           |    | 2.05 Ang. |       |

|                   |                                                  |        |       |
|-------------------|--------------------------------------------------|--------|-------|
| PLAT906_ALERT_3_C | Large K value in the Analysis of Variance .....  | 41.226 | Check |
| PLAT906_ALERT_3_C | Large K value in the Analysis of Variance .....  | 8.793  | Check |
| PLAT906_ALERT_3_C | Large K value in the Analysis of Variance .....  | 4.011  | Check |
| PLAT906_ALERT_3_C | Large K value in the Analysis of Variance .....  | 2.223  | Check |
| PLAT918_ALERT_3_C | Reflection(s) with I(obs) much Smaller I(calc) . | 2      | Check |
| PLAT978_ALERT_2_C | Number C-C Bonds with Positive Residual Density. | 0      | Info  |

---

● **Alert level G**

|                   |                                                            |        |              |
|-------------------|------------------------------------------------------------|--------|--------------|
| PLAT002_ALERT_2_G | Number of Distance or Angle Restraints on AtSite           | 564    | Note         |
| PLAT003_ALERT_2_G | Number of Uiso or Uij Restrained non-H Atoms ...           | 554    | Report       |
| PLAT007_ALERT_5_G | Number of Unrefined Donor-H Atoms .....                    | 18     | Report       |
| PLAT013_ALERT_1_G | N.O.K. _shelx_hkl_checksum found in CIF .....              |        | Please Check |
| PLAT172_ALERT_4_G | The CIF-Embedded .res File Contains DFIX Records           | 239    | Report       |
| PLAT173_ALERT_4_G | The CIF-Embedded .res File Contains DANG Records           | 211    | Report       |
| PLAT174_ALERT_4_G | The CIF-Embedded .res File Contains FLAT Records           | 141    | Report       |
| PLAT177_ALERT_4_G | The CIF-Embedded .res File Contains DELU Records           | 1      | Report       |
| PLAT186_ALERT_4_G | The CIF-Embedded .res File Contains ISOR Records           | 8      | Report       |
| PLAT187_ALERT_4_G | The CIF-Embedded .res File Contains RIGU Records           | 1      | Report       |
| PLAT343_ALERT_2_G | Unusual sp? Angle Range in Main Residue for                | C_73   | Check        |
| PLAT343_ALERT_2_G | Unusual sp? Angle Range in Main Residue for                | C_74   | Check        |
| PLAT343_ALERT_2_G | Unusual sp? Angle Range in Main Residue for                | C_81   | Check        |
| PLAT343_ALERT_2_G | Unusual sp? Angle Range in Main Residue for                | C_77   | Check        |
| PLAT343_ALERT_2_G | Unusual sp? Angle Range in Main Residue for                | C_78   | Check        |
| PLAT343_ALERT_2_G | Unusual sp? Angle Range in Main Residue for                | C_79   | Check        |
| PLAT343_ALERT_2_G | Unusual sp? Angle Range in Main Residue for                | C_84   | Check        |
| PLAT398_ALERT_2_G | Deviating C-O-C Angle from 120 Deg for Ob_6                | 105.5  | Degree       |
| PLAT432_ALERT_2_G | Short Inter X...Y Contact O_37 .. C1_88 ..                 | 3.00   | Ang.         |
| PLAT720_ALERT_4_G | Number of Unusual/Non-Standard Labels .....                | 966    | Note         |
| PLAT790_ALERT_4_G | Centre of Gravity not Within Unit Cell: Resd. #<br>C H Cl3 | 5      | Note         |
| PLAT860_ALERT_3_G | Number of Least-Squares Restraints .....                   | 8374   | Note         |
| PLAT908_ALERT_2_G | Max. Perc. Data with I > 2*s(I) per Res.Shell .            | 66.20% | Note         |
| PLAT910_ALERT_3_G | Missing # of FCF Reflection(s) Below Theta(Min).           | 2      | Note         |
| PLAT913_ALERT_3_G | Missing # of Very Strong Reflections in FCF ....           | 1      | Note         |
| PLAT933_ALERT_2_G | Number of OMIT Records in Embedded .res File ...           | 104    | Note         |
| PLAT961_ALERT_5_G | Dataset Contains no Negative Intensities .....             |        | Please Check |

---

4 **ALERT level A** = Most likely a serious problem - resolve or explain  
41 **ALERT level B** = A potentially serious problem, consider carefully  
190 **ALERT level C** = Check. Ensure it is not caused by an omission or oversight  
27 **ALERT level G** = General information/check it is not something unexpected

2 **ALERT type 1** CIF construction/syntax error, inconsistent or missing data  
228 **ALERT type 2** Indicator that the structure model may be wrong or deficient  
18 **ALERT type 3** Indicator that the structure quality may be low  
12 **ALERT type 4** Improvement, methodology, query or suggestion  
2 **ALERT type 5** Informative message, check

---

It is advisable to attempt to resolve as many as possible of the alerts in all categories. Often the minor alerts point to easily fixed oversights, errors and omissions in your CIF or refinement strategy, so attention to these fine details can be worthwhile. In order to resolve some of the more serious problems it may be necessary to carry out additional measurements or structure refinements. However, the purpose of your study may justify the reported deviations and the more serious of these should normally be commented upon in the discussion or experimental section of a paper or in the "special\_details" fields of the CIF. checkCIF was carefully designed to identify outliers and unusual parameters, but every test has its limitations and alerts that are not important in a particular case may appear. Conversely, the absence of alerts does not guarantee there are no aspects of the results needing attention. It is up to the individual to critically assess their own results and, if necessary, seek expert advice.

### **Publication of your CIF in IUCr journals**

A basic structural check has been run on your CIF. These basic checks will be run on all CIFs submitted for publication in IUCr journals (*Acta Crystallographica*, *Journal of Applied Crystallography*, *Journal of Synchrotron Radiation*); however, if you intend to submit to *Acta Crystallographica Section C* or *E* or *IUCrData*, you should make sure that full publication checks are run on the final version of your CIF prior to submission.

### **Publication of your CIF in other journals**

Please refer to the *Notes for Authors* of the relevant journal for any special instructions relating to CIF submission.

---

**PLATON version of 13/08/2017; check.def file version of 27/07/2017**

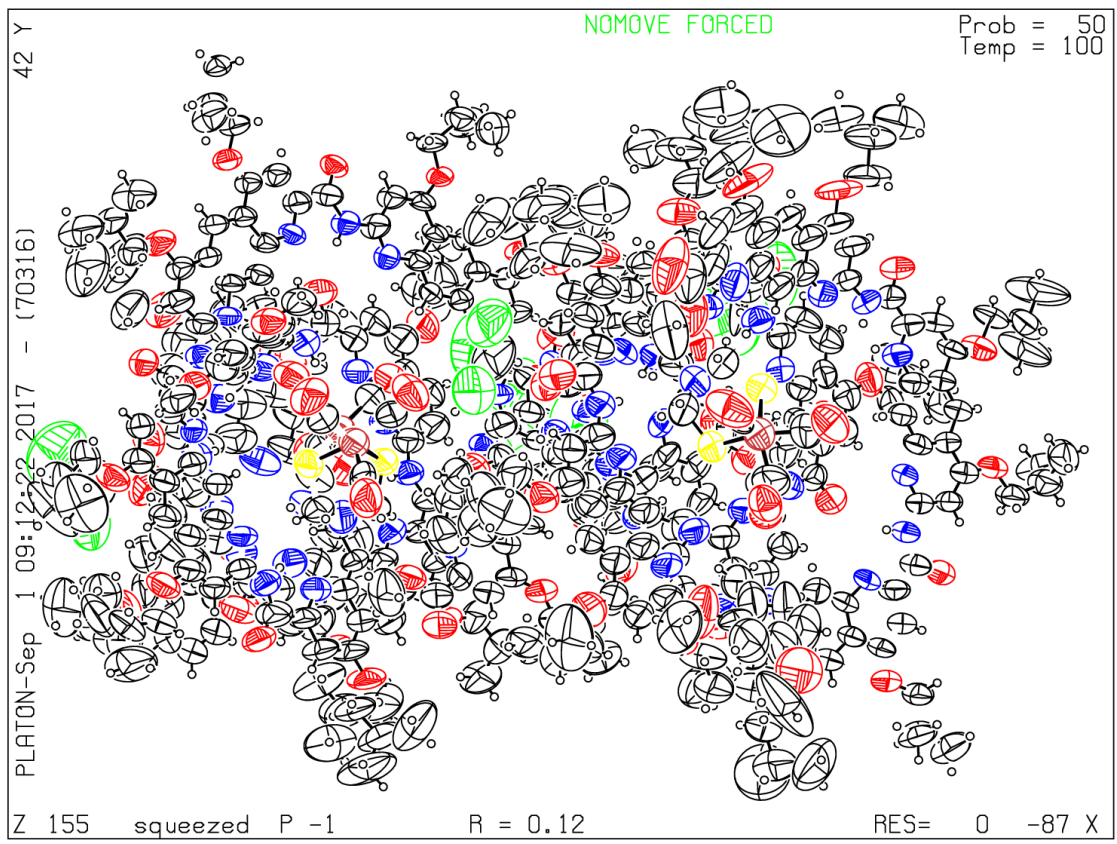

# checkCIF/PLATON report

Structure factors have been supplied for datablock(s) end\_a

THIS REPORT IS FOR GUIDANCE ONLY. IF USED AS PART OF A REVIEW PROCEDURE FOR PUBLICATION, IT SHOULD NOT REPLACE THE EXPERTISE OF AN EXPERIENCED CRYSTALLOGRAPHIC REFEREE.

No syntax errors found.      CIF dictionary      Interpreting this report

## Datablock: end\_a

---

Bond precision:    C-C = 0.0211 Å                      Wavelength=1.54178

Cell:                      a=17.496(4)                      b=21.656(4)                      c=33.846(7)  
                            alpha=97.71(3)                      beta=104.52(3)                      gamma=97.62(3)  
Temperature:            130 K

|                        | Calculated                                        | Reported                              |
|------------------------|---------------------------------------------------|---------------------------------------|
| Volume                 | 12116(5)                                          | 12116(5)                              |
| Space group            | P -1                                              | P -1                                  |
| Hall group             | -P 1                                              | -P 1                                  |
| Moiety formula         | C189 H193 Fe2 N30 O35 S2,<br>C6 H5 Cl [+ solvent] | C189 H193 Fe2 N30 O35 S2,<br>C6 H5 Cl |
| Sum formula            | C195 H198 Cl Fe2 N30 O35<br>S2 [+ solvent]        | C195 H198 Cl Fe2 N30 O35<br>S2        |
| Mr                     | 3733.12                                           | 3733.09                               |
| Dx, g cm <sup>-3</sup> | 1.023                                             | 1.023                                 |
| Z                      | 2                                                 | 2                                     |
| Mu (mm <sup>-1</sup> ) | 1.744                                             | 1.744                                 |
| F000                   | 3918.0                                            | 3918.0                                |
| F000'                  | 3927.23                                           |                                       |
| h,k,lmax               | 15,19,30                                          | 15,19,30                              |
| Nref                   | 19054                                             | 18810                                 |
| Tmin,Tmax              | 0.840,0.840                                       |                                       |
| Tmin'                  | 0.840                                             |                                       |

Correction method= Not given

Data completeness= 0.987                      Theta(max)= 44.491

R(reflections)= 0.0890( 7894)                      wR2(reflections)= 0.2566( 18810)

S = 0.873                                      Npar= 2417

---



The following ALERTS were generated. Each ALERT has the format

**test-name\_ALERT\_alert-type\_alert-level.**

Click on the hyperlinks for more details of the test.

---

### 🔴 Alert level A

THETM01\_ALERT\_3\_A The value of  $\sin(\theta_{\max})/\lambda$  is less than 0.550  
Calculated  $\sin(\theta_{\max})/\lambda = 0.4545$

|                   |                                                |                       |         |       |            |
|-------------------|------------------------------------------------|-----------------------|---------|-------|------------|
| PLAT213_ALERT_2_A | Atom C047                                      | has ADP max/min Ratio | .....   | 5.1   | oblate     |
| PLAT234_ALERT_4_A | Large Hirshfeld Difference                     | C04X                  | --C061  | .     | 0.32 Ang.  |
| PLAT241_ALERT_2_A | High 'MainMol' Ueq as Compared to Neighbors of |                       |         |       | C07D Check |
| PLAT360_ALERT_2_A | Short C(sp3)-C(sp3) Bond                       | C05U                  | - C07D  | .     | 1.22 Ang.  |
| PLAT362_ALERT_2_A | Short C(sp3)-C(sp2) Bond                       | C06X                  | - C07F  | .     | 1.14 Ang.  |
| PLAT410_ALERT_2_A | Short Intra H...H Contact                      | H04G                  | ..H05X  | .     | 1.69 Ang.  |
|                   |                                                |                       | x,y,z = | 1_555 | Check      |

---

### 🟡 Alert level B

|                   |                                                |       |         |       |         |       |
|-------------------|------------------------------------------------|-------|---------|-------|---------|-------|
| PLAT088_ALERT_3_B | Poor Data / Parameter Ratio                    | ..... |         |       | 7.78    | Note  |
| PLAT230_ALERT_2_B | Hirshfeld Test Diff for                        | N00R  | --C03E  | .     | 7.5     | s.u.  |
| PLAT230_ALERT_2_B | Hirshfeld Test Diff for                        | N023  | --C03C  | .     | 7.5     | s.u.  |
| PLAT230_ALERT_2_B | Hirshfeld Test Diff for                        | C031  | --C034  | .     | 7.3     | s.u.  |
| PLAT230_ALERT_2_B | Hirshfeld Test Diff for                        | C039  | --C05F  | .     | 7.6     | s.u.  |
| PLAT234_ALERT_4_B | Large Hirshfeld Difference                     | O01X  | --N01I  | .     | 0.27    | Ang.  |
| PLAT234_ALERT_4_B | Large Hirshfeld Difference                     | C022  | --C04Q  | .     | 0.28    | Ang.  |
| PLAT234_ALERT_4_B | Large Hirshfeld Difference                     | C03H  | --C05C  | .     | 0.28    | Ang.  |
| PLAT234_ALERT_4_B | Large Hirshfeld Difference                     | C03I  | --C04N  | .     | 0.28    | Ang.  |
| PLAT234_ALERT_4_B | Large Hirshfeld Difference                     | C047  | --C04T  | .     | 0.27    | Ang.  |
| PLAT234_ALERT_4_B | Large Hirshfeld Difference                     | C04N  | --C04X  | .     | 0.27    | Ang.  |
| PLAT234_ALERT_4_B | Large Hirshfeld Difference                     | C04S  | --C05E  | .     | 0.27    | Ang.  |
| PLAT234_ALERT_4_B | Large Hirshfeld Difference                     | C052  | --C05V  | .     | 0.26    | Ang.  |
| PLAT234_ALERT_4_B | Large Hirshfeld Difference                     | C05L  | --C06K  | .     | 0.28    | Ang.  |
| PLAT234_ALERT_4_B | Large Hirshfeld Difference                     | C05Y  | --C06I  | .     | 0.28    | Ang.  |
| PLAT234_ALERT_4_B | Large Hirshfeld Difference                     | C065  | --C077  | .     | 0.26    | Ang.  |
| PLAT234_ALERT_4_B | Large Hirshfeld Difference                     | C100  | --C06P  | .     | 0.28    | Ang.  |
| PLAT241_ALERT_2_B | High 'MainMol' Ueq as Compared to Neighbors of |       |         |       | C06X    | Check |
| PLAT242_ALERT_2_B | Low 'MainMol' Ueq as Compared to Neighbors of  |       |         |       | C05U    | Check |
| PLAT242_ALERT_2_B | Low 'MainMol' Ueq as Compared to Neighbors of  |       |         |       | C05Z    | Check |
| PLAT242_ALERT_2_B | Low 'MainMol' Ueq as Compared to Neighbors of  |       |         |       | C08I    | Check |
| PLAT341_ALERT_3_B | Low Bond Precision on C-C Bonds                | ..... |         |       | 0.02108 | Ang.  |
| PLAT360_ALERT_2_B | Short C(sp3)-C(sp3) Bond                       | C16   | - C075  | .     | 1.29    | Ang.  |
| PLAT360_ALERT_2_B | Short C(sp3)-C(sp3) Bond                       | C06A  | - C078  | .     | 1.31    | Ang.  |
| PLAT410_ALERT_2_B | Short Intra H...H Contact                      | H05X  | ..H07M  | .     | 1.80    | Ang.  |
|                   |                                                |       | x,y,z = | 1_555 | Check   |       |
| PLAT412_ALERT_2_B | Short Intra XH3 .. XHn                         | H06F  | ..H0AD  | .     | 1.77    | Ang.  |
|                   |                                                |       | x,y,z = | 1_555 | Check   |       |

---

### 🟢 Alert level C

RINTA01\_ALERT\_3\_C The value of Rint is greater than 0.12  
Rint given 0.143

|                   |                                               |                       |       |  |       |        |
|-------------------|-----------------------------------------------|-----------------------|-------|--|-------|--------|
| PLAT020_ALERT_3_C | The Value of Rint is Greater Than 0.12        | .....                 |       |  | 0.143 | Report |
| PLAT026_ALERT_3_C | Ratio Observed / Unique Reflections (too) Low | ..                    |       |  | 42%   | Check  |
| PLAT084_ALERT_3_C | High wR2 Value (i.e. > 0.25)                  | .....                 |       |  | 0.26  | Report |
| PLAT213_ALERT_2_C | Atom C16                                      | has ADP max/min Ratio | ..... |  | 3.8   | prolat |
| PLAT213_ALERT_2_C | Atom C18                                      | has ADP max/min Ratio | ..... |  | 3.7   | prolat |
| PLAT213_ALERT_2_C | Atom C03Y                                     | has ADP max/min Ratio | ..... |  | 3.3   | prolat |
| PLAT213_ALERT_2_C | Atom C063                                     | has ADP max/min Ratio | ..... |  | 3.3   | prolat |
| PLAT213_ALERT_2_C | Atom C06X                                     | has ADP max/min Ratio | ..... |  | 3.5   | prolat |
| PLAT213_ALERT_2_C | Atom C073                                     | has ADP max/min Ratio | ..... |  | 3.1   | prolat |
| PLAT213_ALERT_2_C | Atom C07D                                     | has ADP max/min Ratio | ..... |  | 3.2   | prolat |

|                   |                            |                           |       |      |        |
|-------------------|----------------------------|---------------------------|-------|------|--------|
| PLAT213_ALERT_2_C | Atom C07V                  | has ADP max/min Ratio     | ..... | 4.0  | prolat |
| PLAT213_ALERT_2_C | Atom C0AA                  | has ADP max/min Ratio     | ..... | 3.3  | prolat |
| PLAT220_ALERT_2_C | NonSolvent Resd 1 C        | Ueq(max)/Ueq(min) Range   |       | 6.0  | Ratio  |
| PLAT222_ALERT_3_C | NonSolvent Resd 1 H        | Uiso(max)/Uiso(min) Range |       | 7.0  | Ratio  |
| PLAT230_ALERT_2_C | Hirshfeld Test Diff for    | O000 --C046               | .     | 5.5  | s.u.   |
| PLAT230_ALERT_2_C | Hirshfeld Test Diff for    | N00Q --C02M               | .     | 6.8  | s.u.   |
| PLAT230_ALERT_2_C | Hirshfeld Test Diff for    | N00U --C02J               | .     | 6.3  | s.u.   |
| PLAT230_ALERT_2_C | Hirshfeld Test Diff for    | N01V --C05D               | .     | 6.9  | s.u.   |
| PLAT230_ALERT_2_C | Hirshfeld Test Diff for    | C02R --C03H               | .     | 6.8  | s.u.   |
| PLAT230_ALERT_2_C | Hirshfeld Test Diff for    | C02V --C03B               | .     | 6.8  | s.u.   |
| PLAT230_ALERT_2_C | Hirshfeld Test Diff for    | C037 --C04T               | .     | 6.8  | s.u.   |
| PLAT230_ALERT_2_C | Hirshfeld Test Diff for    | C043 --C04E               | .     | 6.1  | s.u.   |
| PLAT230_ALERT_2_C | Hirshfeld Test Diff for    | C046 --C04O               | .     | 5.4  | s.u.   |
| PLAT230_ALERT_2_C | Hirshfeld Test Diff for    | C047 --C05J               | .     | 5.5  | s.u.   |
| PLAT230_ALERT_2_C | Hirshfeld Test Diff for    | C04O --C05C               | .     | 5.2  | s.u.   |
| PLAT230_ALERT_2_C | Hirshfeld Test Diff for    | C04Y --C056               | .     | 6.3  | s.u.   |
| PLAT230_ALERT_2_C | Hirshfeld Test Diff for    | C051 --C07O               | .     | 5.1  | s.u.   |
| PLAT230_ALERT_2_C | Hirshfeld Test Diff for    | C052 --C064               | .     | 6.1  | s.u.   |
| PLAT234_ALERT_4_C | Large Hirshfeld Difference | Fe01 --C05I               | .     | 0.20 | Ang.   |
| PLAT234_ALERT_4_C | Large Hirshfeld Difference | O005 --C04M               | .     | 0.21 | Ang.   |
| PLAT234_ALERT_4_C | Large Hirshfeld Difference | O007 --C02M               | .     | 0.19 | Ang.   |
| PLAT234_ALERT_4_C | Large Hirshfeld Difference | O008 --C03Q               | .     | 0.22 | Ang.   |
| PLAT234_ALERT_4_C | Large Hirshfeld Difference | O00E --C05Y               | .     | 0.20 | Ang.   |
| PLAT234_ALERT_4_C | Large Hirshfeld Difference | O00W --C05A               | .     | 0.19 | Ang.   |
| PLAT234_ALERT_4_C | Large Hirshfeld Difference | O016 --C03P               | .     | 0.20 | Ang.   |
| PLAT234_ALERT_4_C | Large Hirshfeld Difference | O016 --C05Z               | .     | 0.22 | Ang.   |
| PLAT234_ALERT_4_C | Large Hirshfeld Difference | O018 --C05M               | .     | 0.21 | Ang.   |
| PLAT234_ALERT_4_C | Large Hirshfeld Difference | O019 --C064               | .     | 0.19 | Ang.   |
| PLAT234_ALERT_4_C | Large Hirshfeld Difference | O01D --C04Z               | .     | 0.18 | Ang.   |
| PLAT234_ALERT_4_C | Large Hirshfeld Difference | O01Z --C05I               | .     | 0.21 | Ang.   |
| PLAT234_ALERT_4_C | Large Hirshfeld Difference | O027 --C046               | .     | 0.23 | Ang.   |
| PLAT234_ALERT_4_C | Large Hirshfeld Difference | O02K --C03Y               | .     | 0.25 | Ang.   |
| PLAT234_ALERT_4_C | Large Hirshfeld Difference | N00A --C02O               | .     | 0.19 | Ang.   |
| PLAT234_ALERT_4_C | Large Hirshfeld Difference | N00A --C025               | .     | 0.17 | Ang.   |
| PLAT234_ALERT_4_C | Large Hirshfeld Difference | N00I --C028               | .     | 0.25 | Ang.   |
| PLAT234_ALERT_4_C | Large Hirshfeld Difference | N00M --C03K               | .     | 0.20 | Ang.   |
| PLAT234_ALERT_4_C | Large Hirshfeld Difference | N00M --C049               | .     | 0.20 | Ang.   |
| PLAT234_ALERT_4_C | Large Hirshfeld Difference | N00Q --C02O               | .     | 0.17 | Ang.   |
| PLAT234_ALERT_4_C | Large Hirshfeld Difference | N00T --C02V               | .     | 0.19 | Ang.   |
| PLAT234_ALERT_4_C | Large Hirshfeld Difference | N00V --C02O               | .     | 0.22 | Ang.   |
| PLAT234_ALERT_4_C | Large Hirshfeld Difference | N012 --C025               | .     | 0.16 | Ang.   |
| PLAT234_ALERT_4_C | Large Hirshfeld Difference | N012 --C03G               | .     | 0.16 | Ang.   |
| PLAT234_ALERT_4_C | Large Hirshfeld Difference | N01A --C038               | .     | 0.17 | Ang.   |
| PLAT234_ALERT_4_C | Large Hirshfeld Difference | N01B --C03U               | .     | 0.17 | Ang.   |
| PLAT234_ALERT_4_C | Large Hirshfeld Difference | N01F --C044               | .     | 0.24 | Ang.   |
| PLAT234_ALERT_4_C | Large Hirshfeld Difference | N01J --C04B               | .     | 0.21 | Ang.   |
| PLAT234_ALERT_4_C | Large Hirshfeld Difference | N01O --C03A               | .     | 0.19 | Ang.   |
| PLAT234_ALERT_4_C | Large Hirshfeld Difference | N01V --C05Q               | .     | 0.20 | Ang.   |
| PLAT234_ALERT_4_C | Large Hirshfeld Difference | N01W --C02Y               | .     | 0.18 | Ang.   |
| PLAT234_ALERT_4_C | Large Hirshfeld Difference | N01Y --C05B               | .     | 0.19 | Ang.   |
| PLAT234_ALERT_4_C | Large Hirshfeld Difference | C01P --C02L               | .     | 0.20 | Ang.   |
| PLAT234_ALERT_4_C | Large Hirshfeld Difference | C01P --C041               | .     | 0.19 | Ang.   |
| PLAT234_ALERT_4_C | Large Hirshfeld Difference | C01R --C033               | .     | 0.20 | Ang.   |
| PLAT234_ALERT_4_C | Large Hirshfeld Difference | C01T --C021               | .     | 0.22 | Ang.   |
| PLAT234_ALERT_4_C | Large Hirshfeld Difference | C02O --C04E               | .     | 0.18 | Ang.   |
| PLAT234_ALERT_4_C | Large Hirshfeld Difference | C024 --C03F               | .     | 0.19 | Ang.   |
| PLAT234_ALERT_4_C | Large Hirshfeld Difference | C026 --C04G               | .     | 0.22 | Ang.   |
| PLAT234_ALERT_4_C | Large Hirshfeld Difference | C02A --C04H               | .     | 0.24 | Ang.   |
| PLAT234_ALERT_4_C | Large Hirshfeld Difference | C02B --C02T               | .     | 0.18 | Ang.   |
| PLAT234_ALERT_4_C | Large Hirshfeld Difference | C02C --C045               | .     | 0.21 | Ang.   |
| PLAT234_ALERT_4_C | Large Hirshfeld Difference | C02F --C03T               | .     | 0.19 | Ang.   |
| PLAT234_ALERT_4_C | Large Hirshfeld Difference | C02H --C032               | .     | 0.17 | Ang.   |

|                   |       |           |                 |                 |        |   |      |       |
|-------------------|-------|-----------|-----------------|-----------------|--------|---|------|-------|
| PLAT234_ALERT_4_C | Large | Hirshfeld | Difference      | C02I            | --C03S | . | 0.18 | Ang.  |
| PLAT234_ALERT_4_C | Large | Hirshfeld | Difference      | C02N            | --C02X | . | 0.23 | Ang.  |
| PLAT234_ALERT_4_C | Large | Hirshfeld | Difference      | C02P            | --C035 | . | 0.19 | Ang.  |
| PLAT234_ALERT_4_C | Large | Hirshfeld | Difference      | C02Q            | --C050 | . | 0.25 | Ang.  |
| PLAT234_ALERT_4_C | Large | Hirshfeld | Difference      | C02S            | --C03N | . | 0.23 | Ang.  |
| PLAT234_ALERT_4_C | Large | Hirshfeld | Difference      | C02U            | --C04U | . | 0.21 | Ang.  |
| PLAT234_ALERT_4_C | Large | Hirshfeld | Difference      | C02W            | --C03F | . | 0.22 | Ang.  |
| PLAT234_ALERT_4_C | Large | Hirshfeld | Difference      | C02W            | --C04D | . | 0.19 | Ang.  |
| PLAT234_ALERT_4_C | Large | Hirshfeld | Difference      | C02Z            | --C030 | . | 0.23 | Ang.  |
| PLAT234_ALERT_4_C | Large | Hirshfeld | Difference      | C038            | --C04L | . | 0.18 | Ang.  |
| PLAT234_ALERT_4_C | Large | Hirshfeld | Difference      | C039            | --C03B | . | 0.20 | Ang.  |
| PLAT234_ALERT_4_C | Large | Hirshfeld | Difference      | C03B            | --C030 | . | 0.22 | Ang.  |
| PLAT234_ALERT_4_C | Large | Hirshfeld | Difference      | C03D            | --C03P | . | 0.24 | Ang.  |
| PLAT234_ALERT_4_C | Large | Hirshfeld | Difference      | C03D            | --C03V | . | 0.19 | Ang.  |
| PLAT234_ALERT_4_C | Large | Hirshfeld | Difference      | C03J            | --C053 | . | 0.21 | Ang.  |
| PLAT234_ALERT_4_C | Large | Hirshfeld | Difference      | C03M            | --C04H | . | 0.18 | Ang.  |
| PLAT234_ALERT_4_C | Large | Hirshfeld | Difference      | C03N            | --C03T | . | 0.24 | Ang.  |
| PLAT234_ALERT_4_C | Large | Hirshfeld | Difference      | C03Q            | --C060 | . | 0.21 | Ang.  |
| PLAT234_ALERT_4_C | Large | Hirshfeld | Difference      | C03V            | --C040 | . | 0.19 | Ang.  |
| PLAT234_ALERT_4_C | Large | Hirshfeld | Difference      | C04A            | --C04Q | . | 0.20 | Ang.  |
| PLAT234_ALERT_4_C | Large | Hirshfeld | Difference      | C04A            | --C04W | . | 0.24 | Ang.  |
| PLAT234_ALERT_4_C | Large | Hirshfeld | Difference      | C04D            | --C04F | . | 0.25 | Ang.  |
| PLAT234_ALERT_4_C | Large | Hirshfeld | Difference      | C04M            | --C05P | . | 0.18 | Ang.  |
| PLAT234_ALERT_4_C | Large | Hirshfeld | Difference      | C04Q            | --C05W | . | 0.25 | Ang.  |
| PLAT234_ALERT_4_C | Large | Hirshfeld | Difference      | C04U            | --C05G | . | 0.22 | Ang.  |
| PLAT234_ALERT_4_C | Large | Hirshfeld | Difference      | C04V            | --C050 | . | 0.25 | Ang.  |
| PLAT234_ALERT_4_C | Large | Hirshfeld | Difference      | C04W            | --C05X | . | 0.24 | Ang.  |
| PLAT234_ALERT_4_C | Large | Hirshfeld | Difference      | C04Y            | --C05B | . | 0.22 | Ang.  |
| PLAT234_ALERT_4_C | Large | Hirshfeld | Difference      | C04Z            | --C05J | . | 0.21 | Ang.  |
| PLAT234_ALERT_4_C | Large | Hirshfeld | Difference      | C051            | --C054 | . | 0.23 | Ang.  |
| PLAT234_ALERT_4_C | Large | Hirshfeld | Difference      | C05N            | --C05P | . | 0.24 | Ang.  |
| PLAT234_ALERT_4_C | Large | Hirshfeld | Difference      | C05T            | --C05W | . | 0.23 | Ang.  |
| PLAT234_ALERT_4_C | Large | Hirshfeld | Difference      | C060            | --C06Q | . | 0.20 | Ang.  |
| PLAT241_ALERT_2_C | High  | 'MainMol' | Ueq as Compared | to Neighbors of |        |   | O00Y | Check |
| PLAT241_ALERT_2_C | High  | 'MainMol' | Ueq as Compared | to Neighbors of |        |   | N01W | Check |
| PLAT241_ALERT_2_C | High  | 'MainMol' | Ueq as Compared | to Neighbors of |        |   | C045 | Check |
| PLAT241_ALERT_2_C | High  | 'MainMol' | Ueq as Compared | to Neighbors of |        |   | C04C | Check |
| PLAT241_ALERT_2_C | High  | 'MainMol' | Ueq as Compared | to Neighbors of |        |   | C04E | Check |
| PLAT241_ALERT_2_C | High  | 'MainMol' | Ueq as Compared | to Neighbors of |        |   | C04L | Check |
| PLAT241_ALERT_2_C | High  | 'MainMol' | Ueq as Compared | to Neighbors of |        |   | C04M | Check |
| PLAT241_ALERT_2_C | High  | 'MainMol' | Ueq as Compared | to Neighbors of |        |   | C04N | Check |
| PLAT241_ALERT_2_C | High  | 'MainMol' | Ueq as Compared | to Neighbors of |        |   | C04U | Check |
| PLAT241_ALERT_2_C | High  | 'MainMol' | Ueq as Compared | to Neighbors of |        |   | C05I | Check |
| PLAT241_ALERT_2_C | High  | 'MainMol' | Ueq as Compared | to Neighbors of |        |   | C061 | Check |
| PLAT241_ALERT_2_C | High  | 'MainMol' | Ueq as Compared | to Neighbors of |        |   | C063 | Check |
| PLAT241_ALERT_2_C | High  | 'MainMol' | Ueq as Compared | to Neighbors of |        |   | C064 | Check |
| PLAT241_ALERT_2_C | High  | 'MainMol' | Ueq as Compared | to Neighbors of |        |   | C06L | Check |
| PLAT242_ALERT_2_C | Low   | 'MainMol' | Ueq as Compared | to Neighbors of |        |   | Fe01 | Check |
| PLAT242_ALERT_2_C | Low   | 'MainMol' | Ueq as Compared | to Neighbors of |        |   | Fe02 | Check |
| PLAT242_ALERT_2_C | Low   | 'MainMol' | Ueq as Compared | to Neighbors of |        |   | O000 | Check |
| PLAT242_ALERT_2_C | Low   | 'MainMol' | Ueq as Compared | to Neighbors of |        |   | O00X | Check |
| PLAT242_ALERT_2_C | Low   | 'MainMol' | Ueq as Compared | to Neighbors of |        |   | O019 | Check |
| PLAT242_ALERT_2_C | Low   | 'MainMol' | Ueq as Compared | to Neighbors of |        |   | C022 | Check |
| PLAT242_ALERT_2_C | Low   | 'MainMol' | Ueq as Compared | to Neighbors of |        |   | C16  | Check |
| PLAT242_ALERT_2_C | Low   | 'MainMol' | Ueq as Compared | to Neighbors of |        |   | C02Y | Check |
| PLAT242_ALERT_2_C | Low   | 'MainMol' | Ueq as Compared | to Neighbors of |        |   | C03C | Check |
| PLAT242_ALERT_2_C | Low   | 'MainMol' | Ueq as Compared | to Neighbors of |        |   | C03I | Check |
| PLAT242_ALERT_2_C | Low   | 'MainMol' | Ueq as Compared | to Neighbors of |        |   | C030 | Check |
| PLAT242_ALERT_2_C | Low   | 'MainMol' | Ueq as Compared | to Neighbors of |        |   | C03Q | Check |
| PLAT242_ALERT_2_C | Low   | 'MainMol' | Ueq as Compared | to Neighbors of |        |   | C04J | Check |
| PLAT242_ALERT_2_C | Low   | 'MainMol' | Ueq as Compared | to Neighbors of |        |   | C04P | Check |
| PLAT242_ALERT_2_C | Low   | 'MainMol' | Ueq as Compared | to Neighbors of |        |   | C04X | Check |

|                   |          |                                       |                                 |         |   |        |        |
|-------------------|----------|---------------------------------------|---------------------------------|---------|---|--------|--------|
| PLAT242_ALERT_2_C | Low      | 'MainMol'                             | Ueq as Compared to Neighbors of |         |   | C04Y   | Check  |
| PLAT242_ALERT_2_C | Low      | 'MainMol'                             | Ueq as Compared to Neighbors of |         |   | C04Z   | Check  |
| PLAT242_ALERT_2_C | Low      | 'MainMol'                             | Ueq as Compared to Neighbors of |         |   | C051   | Check  |
| PLAT242_ALERT_2_C | Low      | 'MainMol'                             | Ueq as Compared to Neighbors of |         |   | C05L   | Check  |
| PLAT242_ALERT_2_C | Low      | 'MainMol'                             | Ueq as Compared to Neighbors of |         |   | C05P   | Check  |
| PLAT242_ALERT_2_C | Low      | 'MainMol'                             | Ueq as Compared to Neighbors of |         |   | C05R   | Check  |
| PLAT242_ALERT_2_C | Low      | 'MainMol'                             | Ueq as Compared to Neighbors of |         |   | C065   | Check  |
| PLAT242_ALERT_2_C | Low      | 'MainMol'                             | Ueq as Compared to Neighbors of |         |   | C066   | Check  |
| PLAT242_ALERT_2_C | Low      | 'MainMol'                             | Ueq as Compared to Neighbors of |         |   | C06C   | Check  |
| PLAT242_ALERT_2_C | Low      | 'MainMol'                             | Ueq as Compared to Neighbors of |         |   | C06I   | Check  |
| PLAT242_ALERT_2_C | Low      | 'MainMol'                             | Ueq as Compared to Neighbors of |         |   | C073   | Check  |
| PLAT242_ALERT_2_C | Low      | 'MainMol'                             | Ueq as Compared to Neighbors of |         |   | C078   | Check  |
| PLAT244_ALERT_4_C | Low      | 'Solvent'                             | Ueq as Compared to Neighbors of |         |   | C06P   | Check  |
| PLAT250_ALERT_2_C | Large    | U3/U1 Ratio for Average U(i,j) Tensor | ...                             |         |   | 2.9    | Note   |
| PLAT260_ALERT_2_C | Large    | Average Ueq of Residue Including      | Fe01                            |         |   | 0.128  | Check  |
| PLAT260_ALERT_2_C | Large    | Average Ueq of Residue Including      | Cl00                            |         |   | 0.208  | Check  |
| PLAT360_ALERT_2_C | Short    | C(sp3)-C(sp3) Bond                    | C2                              | - C066  | . | 1.41   | Ang.   |
| PLAT360_ALERT_2_C | Short    | C(sp3)-C(sp3) Bond                    | C06I                            | - C07L  | . | 1.43   | Ang.   |
| PLAT360_ALERT_2_C | Short    | C(sp3)-C(sp3) Bond                    | C073                            | - C07V  | . | 1.36   | Ang.   |
| PLAT361_ALERT_2_C | Long     | C(sp3)-C(sp3) Bond                    | C16                             | - C067  | . | 1.71   | Ang.   |
| PLAT361_ALERT_2_C | Long     | C(sp3)-C(sp3) Bond                    | C078                            | - C07Q  | . | 1.70   | Ang.   |
| PLAT369_ALERT_2_C | Long     | C(sp2)-C(sp2) Bond                    | C038                            | - C049  | . | 1.53   | Ang.   |
| PLAT369_ALERT_2_C | Long     | C(sp2)-C(sp2) Bond                    | C04Z                            | - C05J  | . | 1.53   | Ang.   |
| PLAT412_ALERT_2_C | Short    | Intra XH3 .. XHn                      | H07D                            | ..H0AC  | . | 1.85   | Ang.   |
|                   |          |                                       |                                 | x,y,z = |   | 1_555  | Check  |
| PLAT905_ALERT_3_C | Negative | K value in the Analysis of Variance   | ...                             |         |   | -6.206 | Report |
| PLAT911_ALERT_3_C | Missing  | FCF Refl Between Thmin & STh/L=       | 0.455                           |         |   | 244    | Report |

### Alert level G

|                   |                                                  |                                 |           |   |  |             |        |
|-------------------|--------------------------------------------------|---------------------------------|-----------|---|--|-------------|--------|
| PLAT002_ALERT_2_G | Number of Distance or Angle Restraints on AtSite |                                 |           |   |  | 8           | Note   |
| PLAT003_ALERT_2_G | Number of Uiso or Uij Restrained non-H Atoms ... |                                 |           |   |  | 47          | Report |
| PLAT007_ALERT_5_G | Number of Unrefined Donor-H Atoms .....          |                                 |           |   |  | 10          | Report |
| PLAT072_ALERT_2_G | SHELXL First Parameter in WGHT Unusually Large   |                                 |           |   |  | 0.15        | Report |
| PLAT154_ALERT_1_G | The s.u.'s on the Cell Angles are Equal ..(Note) |                                 |           |   |  | 0.03        | Degree |
| PLAT172_ALERT_4_G | The CIF-Embedded .res File Contains DFIX Records |                                 |           |   |  | 4           | Report |
| PLAT187_ALERT_4_G | The CIF-Embedded .res File Contains RIGU Records |                                 |           |   |  | 12          | Report |
| PLAT232_ALERT_2_G | Hirshfeld Test Diff (M-X)                        | Fe01                            | --C03Y    | . |  | 7.2         | s.u.   |
| PLAT232_ALERT_2_G | Hirshfeld Test Diff (M-X)                        | Fe02                            | --S003    | . |  | 7.7         | s.u.   |
| PLAT232_ALERT_2_G | Hirshfeld Test Diff (M-X)                        | Fe02                            | --C063    | . |  | 6.2         | s.u.   |
| PLAT343_ALERT_2_G | Unusual sp?                                      | Angle Range in Main Residue for |           |   |  | C063        | Check  |
| PLAT343_ALERT_2_G | Unusual sp3                                      | Angle Range in Main Residue for |           |   |  | C07D        | Check  |
| PLAT432_ALERT_2_G | Short Inter X...Y Contact                        | C02Z                            | ..C04N    |   |  | 3.20        | Ang.   |
|                   |                                                  |                                 | 1+x,y,z = |   |  | 1_655       | Check  |
| PLAT606_ALERT_4_G | Solvent Accessible VOID(S) in Structure .....    |                                 |           |   |  | !           | Info   |
| PLAT720_ALERT_4_G | Number of Unusual/Non-Standard Labels .....      |                                 |           |   |  | 444         | Note   |
| PLAT773_ALERT_2_G | Check long C-C Bond in CIF: C067                 | --C16                           |           |   |  | 1.71        | Ang.   |
| PLAT773_ALERT_2_G | Check long C-C Bond in CIF: C078                 | --C07Q                          |           |   |  | 1.70        | Ang.   |
| PLAT860_ALERT_3_G | Number of Least-Squares Restraints .....         |                                 |           |   |  | 231         | Note   |
| PLAT868_ALERT_4_G | ALERTS Due to the Use of _smtbx_masks Suppressed |                                 |           |   |  | !           | Info   |
| PLAT883_ALERT_1_G | No Info/Value for _atom_sites_solution_primary   |                                 |           |   |  | Please Do ! |        |
| PLAT910_ALERT_3_G | Missing # of FCF Reflection(s) Below Theta(Min). |                                 |           |   |  | 2           | Note   |
| PLAT913_ALERT_3_G | Missing # of Very Strong Reflections in FCF .... |                                 |           |   |  | 1           | Note   |
| PLAT933_ALERT_2_G | Number of OMIT Records in Embedded .res File ... |                                 |           |   |  | 8           | Note   |
| PLAT941_ALERT_3_G | Average HKL Measurement Multiplicity .....       |                                 |           |   |  | 4.2         | Low    |
| PLAT978_ALERT_2_G | Number C-C Bonds with Positive Residual Density. |                                 |           |   |  | 1           | Info   |

- 
- 7 **ALERT level A** = Most likely a serious problem - resolve or explain  
26 **ALERT level B** = A potentially serious problem, consider carefully  
161 **ALERT level C** = Check. Ensure it is not caused by an omission or oversight  
25 **ALERT level G** = General information/check it is not something unexpected

2 ALERT type 1 CIF construction/syntax error, inconsistent or missing data  
106 ALERT type 2 Indicator that the structure model may be wrong or deficient  
14 ALERT type 3 Indicator that the structure quality may be low  
96 ALERT type 4 Improvement, methodology, query or suggestion  
1 ALERT type 5 Informative message, check

---

It is advisable to attempt to resolve as many as possible of the alerts in all categories. Often the minor alerts point to easily fixed oversights, errors and omissions in your CIF or refinement strategy, so attention to these fine details can be worthwhile. In order to resolve some of the more serious problems it may be necessary to carry out additional measurements or structure refinements. However, the purpose of your study may justify the reported deviations and the more serious of these should normally be commented upon in the discussion or experimental section of a paper or in the "special\_details" fields of the CIF. checkCIF was carefully designed to identify outliers and unusual parameters, but every test has its limitations and alerts that are not important in a particular case may appear. Conversely, the absence of alerts does not guarantee there are no aspects of the results needing attention. It is up to the individual to critically assess their own results and, if necessary, seek expert advice.

### **Publication of your CIF in IUCr journals**

A basic structural check has been run on your CIF. These basic checks will be run on all CIFs submitted for publication in IUCr journals (*Acta Crystallographica*, *Journal of Applied Crystallography*, *Journal of Synchrotron Radiation*); however, if you intend to submit to *Acta Crystallographica Section C* or *E* or *IUCrData*, you should make sure that full publication checks are run on the final version of your CIF prior to submission.

### **Publication of your CIF in other journals**

Please refer to the *Notes for Authors* of the relevant journal for any special instructions relating to CIF submission.

---

**PLATON version of 10/08/2020; check.def file version of 06/08/2020**

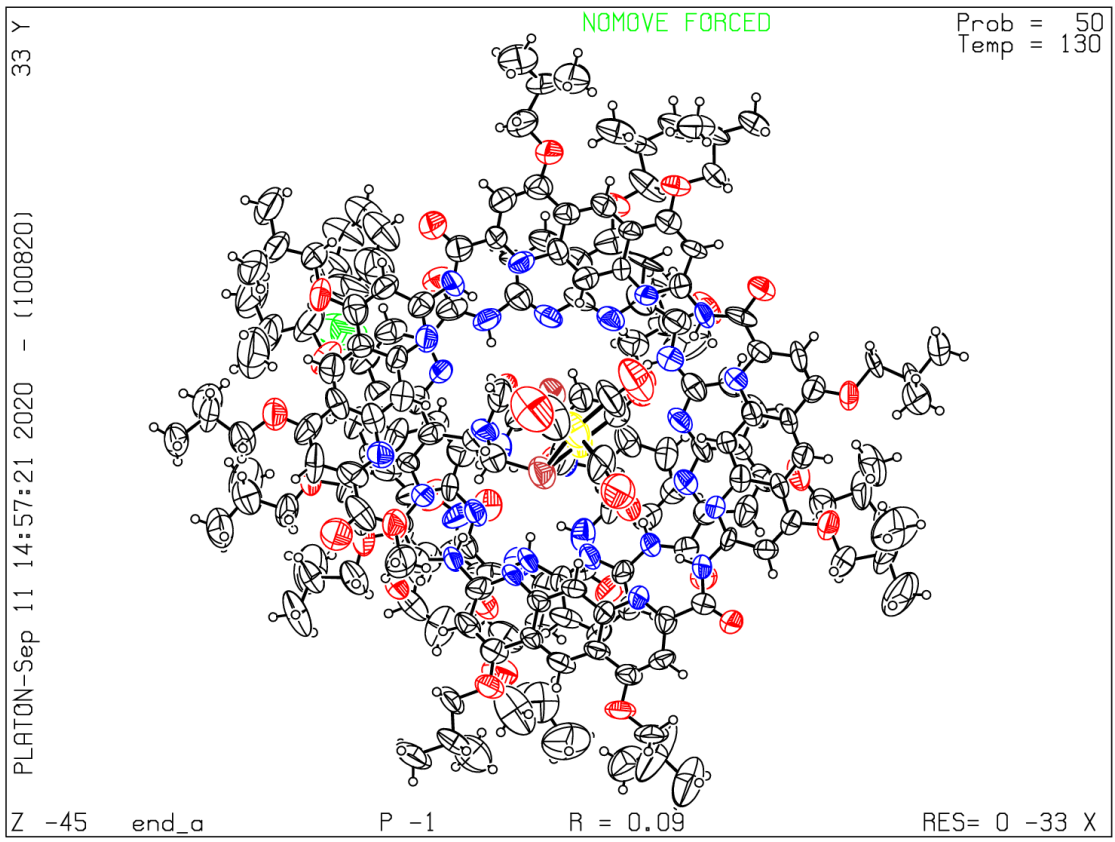

# checkCIF/PLATON report

Structure factors have been supplied for datablock(s) a-fe\_fip2011

THIS REPORT IS FOR GUIDANCE ONLY. IF USED AS PART OF A REVIEW PROCEDURE FOR PUBLICATION, IT SHOULD NOT REPLACE THE EXPERTISE OF AN EXPERIENCED CRYSTALLOGRAPHIC REFEREE.

No syntax errors found.      CIF dictionary      Interpreting this report

## Datablock: a-fe\_fip2011

---

Bond precision:    C-C = 0.0083 A                      Wavelength=0.80000

Cell:                      a=11.614(2)              b=11.913(2)              c=14.995(3)  
                            alpha=90.34(3)          beta=100.67(3)          gamma=114.20(3)  
Temperature:    100 K

|                | Calculated            | Reported              |
|----------------|-----------------------|-----------------------|
| Volume         | 1851.9(8)             | 1851.9(8)             |
| Space group    | P -1                  | P -1                  |
| Hall group     | -P 1                  | -P 1                  |
| Moiety formula | C33 H33 Fe2 N3 O12 S2 | C33 H33 Fe2 N3 O12 S2 |
| Sum formula    | C33 H33 Fe2 N3 O12 S2 | C33 H33 Fe2 N3 O12 S2 |
| Mr             | 839.44                | 839.44                |
| Dx,g cm-3      | 1.505                 | 1.505                 |
| Z              | 2                     | 2                     |
| Mu (mm-1)      | 1.320                 | 1.329                 |
| F000           | 864.0                 | 864.0                 |
| F000'          | 866.58                |                       |
| h,k,lmax       | 12,12,15              | 12,12,15              |
| Nref           | 4528                  | 3993                  |
| Tmin,Tmax      |                       |                       |
| Tmin'          |                       |                       |

Correction method= Not given

Data completeness= 0.882                      Theta(max)= 24.895

R(reflections)= 0.0575( 3617)              wR2(reflections)= 0.1550( 3993)

S = 1.038                                      Npar= 507

---

The following ALERTS were generated. Each ALERT has the format  
**test-name\_ALERT\_alert-type\_alert-level.**  
Click on the hyperlinks for more details of the test.

---

### 🔴 Alert level A

THETM01\_ALERT\_3\_A The value of sine(theta\_max)/wavelength is less than 0.550  
Calculated sin(theta\_max)/wavelength = 0.5262  
PLAT029\_ALERT\_3\_A \_diffn\_measured\_fraction\_theta\_full value Low . 0.882 Why?

---

### 🟡 Alert level B

PLAT088\_ALERT\_3\_B Poor Data / Parameter Ratio ..... 7.88 Note  
PLAT213\_ALERT\_2\_B Atom C17A has ADP max/min Ratio ..... 4.7 oblate  
PLAT911\_ALERT\_3\_B Missing FCF Refl Between Thmin & STh/L= 0.526 533 Report

---

### 🟢 Alert level C

PLAT213\_ALERT\_2\_C Atom O5 has ADP max/min Ratio ..... 3.1 oblate  
PLAT213\_ALERT\_2\_C Atom C20B has ADP max/min Ratio ..... 3.4 prolat  
PLAT213\_ALERT\_2\_C Atom C201 has ADP max/min Ratio ..... 3.3 oblate  
PLAT220\_ALERT\_2\_C NonSolvent Resd 1 C Ueq(max)/Ueq(min) Range 4.3 Ratio  
PLAT222\_ALERT\_3\_C NonSolvent Resd 1 H Uiso(max)/Uiso(min) Range 4.3 Ratio  
PLAT250\_ALERT\_2\_C Large U3/U1 Ratio for Average U(i,j) Tensor .... 2.4 Note  
PLAT341\_ALERT\_3\_C Low Bond Precision on C-C Bonds ..... 0.00828 Ang.  
PLAT913\_ALERT\_3\_C Missing # of Very Strong Reflections in FCF .... 4 Note  
PLAT977\_ALERT\_2\_C Check Negative Difference Density on H28A -0.32 eA-3

---

### 🟠 Alert level G

ABSMU01\_ALERT\_1\_G Calculation of \_exptl\_absorpt\_correction\_mu  
not performed for this radiation type.  
PLAT003\_ALERT\_2\_G Number of Uiso or Uij Restrained non-H Atoms ... 6 Report  
PLAT083\_ALERT\_2\_G SHELXL Second Parameter in WGHT Unusually Large 6.58 Why ?  
PLAT092\_ALERT\_4\_G Check: Wavelength Given is not Cu,Ga,Mo,Ag,In Ka 0.80000 Ang.  
PLAT154\_ALERT\_1\_G The s.u.'s on the Cell Angles are Equal ..(Note) 0.03 Degree  
PLAT186\_ALERT\_4\_G The CIF-Embedded .res File Contains ISOR Records 1 Report  
PLAT187\_ALERT\_4\_G The CIF-Embedded .res File Contains RIGU Records 1 Report  
PLAT301\_ALERT\_3\_G Main Residue Disorder .....(Resd 1 ) 8% Note  
PLAT432\_ALERT\_2\_G Short Inter X...Y Contact 0605 ..C202 2.90 Ang.  
2-x,2-y,-z = 2\_775 Check  
PLAT722\_ALERT\_1\_G Angle Calc 110.00, Rep 108.90 Dev... 1.10 Degree  
H17A -C17A -H17B 1.555 1.555 1.555 # 151 Check  
PLAT860\_ALERT\_3\_G Number of Least-Squares Restraints ..... 465 Note  
PLAT883\_ALERT\_1\_G No Info/Value for \_atom\_sites\_solution\_primary . Please Do !  
PLAT909\_ALERT\_3\_G Percentage of I>2sig(I) Data at Theta(Max) Still 82% Note  
PLAT910\_ALERT\_3\_G Missing # of FCF Reflection(s) Below Theta(Min). 2 Note  
PLAT933\_ALERT\_2\_G Number of OMIT Records in Embedded .res File ... 20 Note  
PLAT941\_ALERT\_3\_G Average HKL Measurement Multiplicity ..... 2.8 Low  
PLAT978\_ALERT\_2\_G Number C-C Bonds with Positive Residual Density. 1 Info  
PLAT984\_ALERT\_1\_G The Fe-f'= 0.3685 Deviates from the B&C-Value 0.3563 Check  
PLAT985\_ALERT\_1\_G The Fe-f"= 1.0547 Deviates from the B&C-Value 1.0512 Check

---

2 **ALERT level A** = Most likely a serious problem - resolve or explain  
3 **ALERT level B** = A potentially serious problem, consider carefully  
9 **ALERT level C** = Check. Ensure it is not caused by an omission or oversight  
19 **ALERT level G** = General information/check it is not something unexpected

6 ALERT type 1 CIF construction/syntax error, inconsistent or missing data  
12 ALERT type 2 Indicator that the structure model may be wrong or deficient  
12 ALERT type 3 Indicator that the structure quality may be low  
3 ALERT type 4 Improvement, methodology, query or suggestion  
0 ALERT type 5 Informative message, check

---



It is advisable to attempt to resolve as many as possible of the alerts in all categories. Often the minor alerts point to easily fixed oversights, errors and omissions in your CIF or refinement strategy, so attention to these fine details can be worthwhile. In order to resolve some of the more serious problems it may be necessary to carry out additional measurements or structure refinements. However, the purpose of your study may justify the reported deviations and the more serious of these should normally be commented upon in the discussion or experimental section of a paper or in the "special\_details" fields of the CIF. checkCIF was carefully designed to identify outliers and unusual parameters, but every test has its limitations and alerts that are not important in a particular case may appear. Conversely, the absence of alerts does not guarantee there are no aspects of the results needing attention. It is up to the individual to critically assess their own results and, if necessary, seek expert advice.

### **Publication of your CIF in IUCr journals**

A basic structural check has been run on your CIF. These basic checks will be run on all CIFs submitted for publication in IUCr journals (*Acta Crystallographica*, *Journal of Applied Crystallography*, *Journal of Synchrotron Radiation*); however, if you intend to submit to *Acta Crystallographica Section C* or *E* or *IUCrData*, you should make sure that full publication checks are run on the final version of your CIF prior to submission.

### **Publication of your CIF in other journals**

Please refer to the *Notes for Authors* of the relevant journal for any special instructions relating to CIF submission.

---

**PLATON version of 26/06/2020; check.def file version of 17/06/2020**

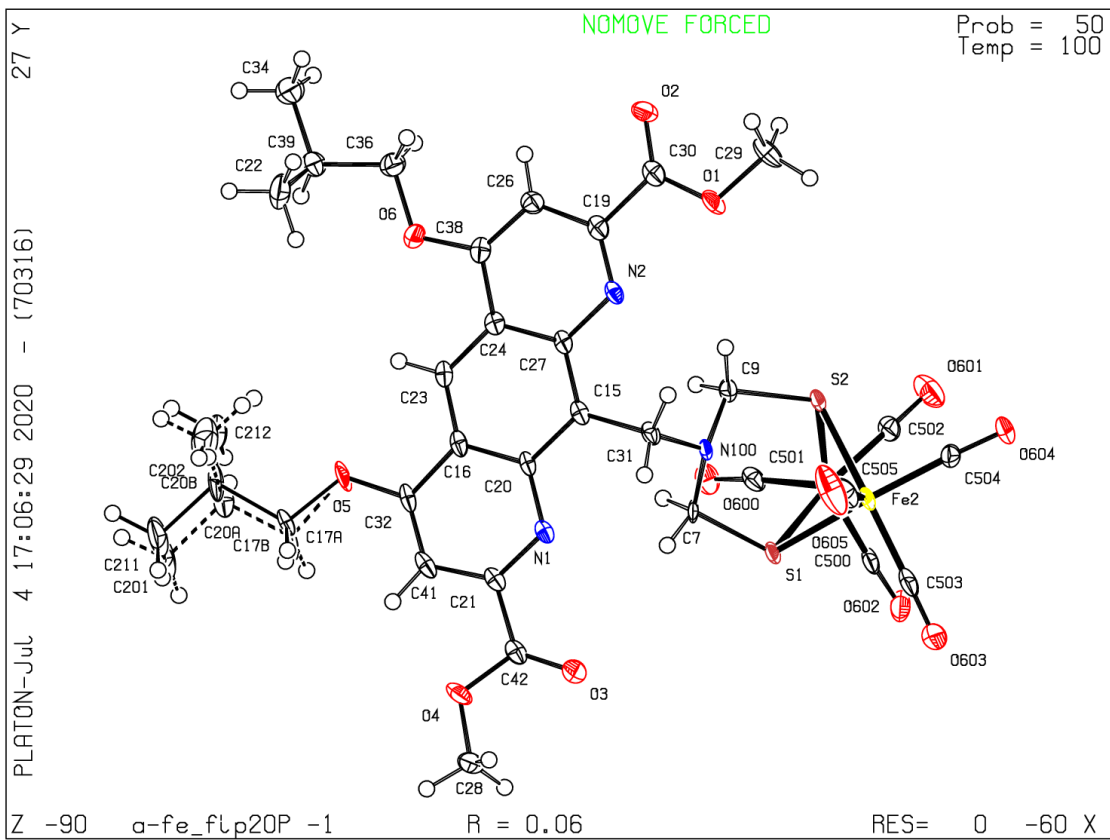

Supplement: d0sc05143h1.pdf [file d0sc05143h1.pdf]
